# Supplementary material for: Climate change policies fail to protect child health
Source: Research Square preprint supplement (doi:10.21203/rs.3.rs-6670422/v1), 2025-05-22
Supplement: Supplementary file 1 [file 9fbfcc3191a02d3814f36ab6.docx]

**Explanation of policy evaluation criteria**

We elected to use the binary “yes/no” Cheung et al. system (1) to minimise subjectivity, and to improve the speed and reproducibility of the method. This makes it a simple, effective tool for policymakers and researchers that can be adapted for a variety of other health contexts. Items 2 and 9 were adapted from the WHO criteria to resemble the Paz-Soldán et al. criteria: “There are a minimum of two detected problems with context included” and “There are a minimum of two proposals, actions, and/or suggestions” (2). This further minimised subjectivity, considering the scarcity of objective, country-aggregated research on climate-sensitive health risks for children.

**Explanations for changes made from the Cheung et al. criteria in each category:**

*Accessibility:* it was unrealistic to determine whether policies were available in hard-copy form.

*Policy background:* “Children have been recognised as being disproportionately affected by the impacts of climate change” was added - this was considered a necessary aspect of our analysis as it determined whether policies acknowledge that child health should be prioritised for adaptation, regardless if actions were provided. “The policy encompasses some set of feasible alternatives” was excluded – as we assessed individual actions for child health, not the policy as a whole, we did not consider it realistic or useful to provide alternatives for individual actions within the policies.

*Goals:* “The mechanisms by which children and/or pregnant women will be specifically targeted by the action are explicitly stated” was added – some policies provided a generic action targeted at vulnerable populations but did not explicitly describe what mechanisms would be used to target children. “The policy is supported by evidence of external validity…” and “the policy is supported by internal validity…” were excluded, as these items were difficult to determine for individual sections of policies. “Actions comprehensively address climate-sensitive health risks identified in policy background” was added, as this helped to identify whether actions comprehensively addressed the specific vulnerabilities of children in that region.

*Resources:* “The cost of condition to community has been mentioned” was excluded. To adapt this criterion to child health, policies would be required to provide the financial cost of harms to child health due to climate change. However, given that there is limited research in this area (3), comprehensive financial costs to children cannot be estimated. “The policy indicates strategies to mobilise the required resources” was added, as this will help countries to seek external funding and optimise resource use for medium- and long-term sustainability of initiatives (4).

*“Public opportunities”* and *“Obligations”* have been merged to form the category *“Implementation”.* “Primary concerns of stakeholders are recognised and acknowledged to obtain long-term support” was excluded as external support was difficult to ascertain from the policy document alone. “Scientific results are compelling for action” was excluded as scientific evidence has already established that the impacts of climate change on child health are severe enough to compel action (5).

1. Cheung KK, Mirzaei M, Leeder S. Health Policy Analysis: A Tool to Evaluate in Policy Documents the Alignment between Policy Statements and Intended Outcomes. Australian health review. 2010;34(4):405-13.

2. Paz-Soldán VA, Valcarcel A, Canal-Solis K, Miranda-Chacon Z, Palmeiro-Silva YK, Hartinger SM, et al. A critical analysis of national plans for climate adaptation for health in South America. Lancet Regional Health - Americas (Online). 2023;26:100604-.

3. Berrang-Ford L, Sietsma AJ, Callaghan M, Minx JC, Scheelbeek PFD, Haddaway NR, et al. Systematic mapping of global research on climate and health: a machine learning review. Lancet Planet Health. 2021;5(8):e514-e25.

4. World Health Organization. Quality Criteria for Health National Adaptation Plans. Geneva; 2021. Available from: https://iris.who.int/bitstream/handle/10665/339454/9789240018983-eng.pdf?sequence=1.

5. UNICEF. Climate change [Internet]. Panama: UNICEF Latin American and the Caribbean Regional Office; 2024. Available from: https://www.unicef.org/lac/en/climatechange#:~:text=They%20are%20also%20at%20higher%20risk%20of%20diseases,will%20be%20bor ne%20by%20children%20under%20five%20years.
