# Supplementary material for: Climate change policies fail to protect child health
Source: Research Square preprint supplement (doi:10.21203/rs.3.rs-6670422/v1), 2025-05-22
Supplement: Supplementary file 2 [file a1b6e935fd269cca2ec2af01.docx]

## **AFRICAN REGION**

### **Algeria** – Plan National Climat

|  | **Criteria** | **Criterion addressed?** | **Explanation** | **Quote** |
| --- | --- | --- | --- | --- |
| Policy Background | Children recognised as disproportionately affected by the impacts of climate change | No |  |  |
| Minimum of two context-specific climate-sensitive health risks for children identified | No |  |  |
| Source of background is explicit  Authority (one or more persons, books, scientific articles or sources of information)  Quantitative or qualitative analysis,  Deduction (premises that have been established from authority, observation, intuition or all three) | No |  |  |
| Goals | Goals for child health explicitly stated | No |  |  |
| Goals are concrete enough (quantitative where possible and qualitative where not) to be evaluated later | No |  |  |
| Goal is clear in its intent and in the mechanism with which to achieve the desired goals, yet does not attempt to prescribe in detail what the change must be | No |  |  |
| Action/s outlined to improve child health | Yes |  | “Support for the implementation of diarrhea surveillance in children in the wilaya of Oran” |
| Mechanisms by which children and/or pregnant women will be specifically targeted by the action are explicitly stated | No | The exact nature of the “support” is not described. Further information needed on how the surveillance will target children |  |
| Minimum of two actions | No |  |  |
| Actions comprehensively address climate-sensitive health risks identified in policy background | No |  |  |
| Resources | Financial resources addressed  Estimated financial resources for implementation of the action/s given  Allocated financial resources for implementation of the action/s clear  Rewards/sanctions for spending allocated resources on other programs | No |  |  |
| Human resources addressed | No |  |  |
| Organisational capacity addressed | No |  |  |
| Policy indicated strategies to mobilise required resources | No |  |  |
| Monitoring and Evaluation | Policy indicated monitoring and evaluation mechanisms to track progress on goals for child health | No | No goals for child health |  |
| Policy nominated a committee or independent body to do evaluation | No |  |  |
| Outcome measures identified for each of the explicit and implicit objectives | No |  |  |
| Data for evaluation will be collected before, during, and after introduction of the new policy | No |  |  |
| Follow-up takes place after a sufficient period to allow the effects of policy change to become evident | No |  |  |
| Other factors that could have produced the change (other than policy) identified | No |  |  |
| Criteria for evaluation adequate or clear | No |  |  |
| Implementation | Multiple stakeholders involved in the design and implementation of the action/s | No | MSPRH is involved; other stakeholders consulted for the action are unclear/not explicitly stated |  |
| Obligations of the various implementers specified – who has to do what? | No |  |  |

Summary

| **Criteria** | **Quality** |
| --- | --- |
| Policy Background | Weak |
| Goals | Needs improvement |
| Resources | Weak |
| Monitoring and Evaluation | Weak |
| Implementation | Weak |

### **Angola** – National Strategy for Climate Change 2022-2035

|  | **Criteria** | **Criterion addressed?** | **Explanation** | **Quote** |
| --- | --- | --- | --- | --- |
| Policy Background | Children recognised as disproportionately affected by the impacts of climate change | Yes |  |  |
| Minimum of two context-specific climate-sensitive health risks for children identified | No | Climate risk areas identified: vector-borne diseases | “[malaria] is the leading cause of death in the country (130 per 1,000 inhabitants in 2014), significantly affecting the child population (around 33% of perinatal deaths).” |
| Source of background is explicit  Authority (one or more persons, books, scientific articles or sources of information)  Quantitative or qualitative analysis,  Deduction (premises that have been established from authority, observation, intuition or all three) | Yes | Government publications |  |
| Goals | Goals for child health explicitly stated | No |  |  |
| Goals are concrete enough (quantitative where possible and qualitative where not) to be evaluated later | No |  |  |
| Goal is clear in its intent and in the mechanism with which to achieve the desired goals, yet does not attempt to prescribe in detail what the change must be | No |  |  |
| Action/s outlined to improve child health | No | Teaching climate change mitigation and adaptation in schools is described, but it is unclear whether this includes health information |  |
| Mechanisms by which children and/or pregnant women will be specifically targeted by the action are explicitly stated | No |  |  |
| Minimum of two actions | No |  |  |
| Actions comprehensively address climate-sensitive health risks identified in policy background | No |  |  |
| Resources | Financial resources addressed  Estimated financial resources for implementation of the action/s given  Allocated financial resources for implementation of the action/s clear  Rewards/sanctions for spending allocated resources on other programs | No |  |  |
| Human resources addressed | No |  |  |
| Organisational capacity addressed | No |  |  |
| Policy indicated strategies to mobilise required resources | No |  |  |
| Monitoring and Evaluation | Policy indicated monitoring and evaluation mechanisms to track progress on goals for child health | No |  |  |
| Policy nominated a committee or independent body to do evaluation | No |  |  |
| Outcome measures identified for each of the explicit and implicit objectives | No |  |  |
| Data for evaluation will be collected before, during, and after introduction of the new policy | No |  |  |
| Follow-up takes place after a sufficient period to allow the effects of policy change to become evident | No |  |  |
| Other factors that could have produced the change (other than policy) identified | No |  |  |
| Criteria for evaluation adequate or clear | No |  |  |
| Implementation | Multiple stakeholders involved in the design and implementation of the action/s | No |  |  |
| Obligations of the various implementers specified – who has to do what? | No |  |  |

Summary

| **Criteria** | **Quality** |
| --- | --- |
| Policy Background | Needs improvement |
| Goals | Weak |
| Resources | Weak |
| Monitoring and Evaluation | Weak |
| Implementation | Weak |

### **Benin** – Plan national d’adaptation aux changements climatiques du Bénin

|  | **Criteria** | **Criterion addressed?** | **Explanation** | **Quote** |
| --- | --- | --- | --- | --- |
| Policy Background | Children recognised as disproportionately affected by the impacts of climate change | Yes | Children are described as a vulnerable group | “…the NAP and its recommended measures integrate the differential impacts of climate change on… children… and other potentially vulnerable groups” |
| Minimum of two context-specific climate-sensitive health risks for children identified | Yes | Climate risk areas: extreme weather events; effects on health systems; malnutrition and food insecurity | “Women and children are assigned to the chore of fetching water and collecting fuelwood for reproductive activities (drinking, meal preparation, laundry, washing up, showering, watering, etc.). In times of drought, they have to travel long distances to collect water… Water collection increases the vulnerability of women and girls in the context of climate change, through their exposure to water scarcity and recurrent flooding.”  “From a social and health standpoint, the population’s ability to access the services offered by the health system appears to be uneven across the different communes. The elderly, transporters and children under 5 are the social groups that make the least use of the health center.”  “In the southern health zones… the health services most exposed to [flooding and heavy rainfall] are those in charge of prenatal consultations (CPN)…”  “According to the TCN report, the consequences in terms of health include a drop in acquired immunity in pregnant women… a decline in growth in children (under 5) and very high infant mortality.”  “[vulnerable groups] are characterized by reduced food accessibility and increased malnutrition, with often irreversible consequences for young children.” |
| Source of background is explicit  Authority (one or more persons, books, scientific articles or sources of information)  Quantitative or qualitative analysis,  Deduction (premises that have been established from authority, observation, intuition or all three) | Yes | Vulnerability assessment, scientific reports |  |
| Goals | Goals for child health explicitly stated | No | The goal “Strengthen the adaptive capacity of vulnerable groups such as women, orphans, vulnerable children…” is provided. However, all associated measures do not have an explicit link to child health. |  |
| Goals are concrete enough (quantitative where possible and qualitative where not) to be evaluated later | No |  |  |
| Goal is clear in its intent and in the mechanism with which to achieve the desired goals, yet does not attempt to prescribe in detail what the change must be | No |  |  |
| Action/s outlined to improve child health | Yes |  | “Ensure women’s access to all health services and, where necessary, provide free care for mothers and their children.” |
| Mechanisms by which children and/or pregnant women will be specifically targeted by the action are explicitly stated | Yes | Free care for mothers and their children. |  |
| Minimum of two actions | No |  |  |
| Actions comprehensively address climate-sensitive health risks identified in policy background | No |  |  |
| Resources | Financial resources addressed  Estimated financial resources for implementation of the action/s given  Allocated financial resources for implementation of the action/s clear  Rewards/sanctions for spending allocated resources on other programs | No |  |  |
| Human resources addressed | No |  |  |
| Organisational capacity addressed | No |  |  |
| Policy indicated strategies to mobilise required resources | No |  |  |
| Monitoring and Evaluation | Policy indicated monitoring and evaluation mechanisms to track progress on goals for child health | No |  |  |
| Policy nominated a committee or independent body to do evaluation | No |  |  |
| Outcome measures identified for each of the explicit and implicit objectives | No |  |  |
| Data for evaluation will be collected before, during, and after introduction of the new policy | No |  |  |
| Follow-up takes place after a sufficient period to allow the effects of policy change to become evident | No |  |  |
| Other factors that could have produced the change (other than policy) identified | No |  |  |
| Criteria for evaluation adequate or clear | No |  |  |
| Implementation | Multiple stakeholders involved in the design and implementation of the action/s | No |  |  |
| Obligations of the various implementers specified – who has to do what? | No |  |  |

Summary

| **Criteria** | **Quality** |
| --- | --- |
| Policy Background | Strong |
| Goals | Needs improvement |
| Resources | Weak |
| Monitoring and Evaluation | Weak |
| Implementation | Weak |

### **Botswana** – A National Climate Change Action Plan for Botswana

|  | **Criteria** | **Criterion addressed?** | **Explanation** | **Quote** |
| --- | --- | --- | --- | --- |
| Policy Background | Children recognised as disproportionately affected by the impacts of climate change | Yes | Children are referred to as a vulnerable group | “…community members most vulnerable to health impacts from climate change (…young children…)” |
| Minimum of two context-specific climate-sensitive health risks for children identified | No |  |  |
| Source of background is explicit  Authority (one or more persons, books, scientific articles or sources of information)  Quantitative or qualitative analysis,  Deduction (premises that have been established from authority, observation, intuition or all three) | No |  |  |
| Goals | Goals for child health explicitly stated | No |  |  |
| Goals are concrete enough (quantitative where possible and qualitative where not) to be evaluated later | No |  |  |
| Goal is clear in its intent and in the mechanism with which to achieve the desired goals, yet does not attempt to prescribe in detail what the change must be | No |  |  |
| Action/s outlined to improve child health | Yes | Community-based monitoring and response system, providing community support (no further detail provided on community support)  Improve participation of women and female-headed households in disaster management public gatherings  Updating the national school curriculum to discuss climate change effects and adaptive capacities of different social groups; unclear if this includes health information. | “Implement a voluntary community-based monitoring and response system to identify community members most vulnerable to health impacts from climate change (…young children…) and to provide community support to these vulnerable members in times of need.”  “Ensure the full participation of women and female-headed households in disaster management public gatherings, to address both the higher vulnerability of women and children and to plan for the higher post-disaster burden placed on women due to their dual roles as producers and carers.” |
| Mechanisms by which children and/or pregnant women will be specifically targeted by the action are explicitly stated | No | Mechanisms by which children will be targeted are not explicitly stated |  |
| Minimum of two actions | Yes |  |  |
| Actions comprehensively address climate-sensitive health risks identified in policy background | No |  |  |
| Resources | Financial resources addressed  Estimated financial resources for implementation of the action/s given  Allocated financial resources for implementation of the action/s clear  Rewards/sanctions for spending allocated resources on other programs | No |  |  |
| Human resources addressed | No |  |  |
| Organisational capacity addressed | No |  |  |
| Policy indicated strategies to mobilise required resources | No |  |  |
| Monitoring and Evaluation | Policy indicated monitoring and evaluation mechanisms to track progress on goals for child health | Yes |  |  |
| Policy nominated a committee or independent body to do evaluation | No |  |  |
| Outcome measures identified for each of the explicit and implicit objectives | Yes | Targets and indicators have been set for 2020, 2023, 2026 and 2030. | “2020 Target: Begin a process of community level engagement, identify individuals/organisations in the community to establish forums to design and manage monitoring and response system. Delineate clear paths of action, responsibility and response within the system… 2020 KP indicators: System design underway. List of individuals and organisations completed. Plan of action created.”  “2023 Target: System formalised and ratified. National roll out of the system. Awareness campaign material distributed, and systems set up in… 2023 KP indicators: System design complete. System launched and rolled out to 30% of population.”  “2026 Target: Awareness campaign material distributed, and systems set up in communities. Systems operational and working in conjunction with national healthcare system… 2026 KP indicators: System operational and accessible to 60% of population.”  “2030 Target: Systems operational and working in conjunction with national healthcare system… 2030 KP indicators: System operational and accessible to 90%+ of population.”  “2020 Target: The NDMO actively targets women’s groups for invitation to and participation in regional gatherings and information dissemination exercises… 2020 KP indicators: Plan created by NDMO for actively targeting women to increase attendance in disaster management public meetings. Implementation commenced.”  “2023 Target: Women are equal participants in yearly disaster management public gatherings… 2023 KP indicators: Plan implemented. Attendance of women at meetings up by 30%.”  “2026 Target: Women are equal participants in yearly disaster management public gatherings… 2026 KP indicators: Plan implemented. Attendance of women at meetings up by 60%.”  “2030 Target: Women are equal participants in yearly disaster management public gatherings… 2030 KP indicators: Plan implemented. Attendance of women at meetings up by 90%+” |
| Data for evaluation will be collected before, during, and after introduction of the new policy | Yes |  |  |
| Follow-up takes place after a sufficient period to allow the effects of policy change to become evident | Yes |  |  |
| Other factors that could have produced the change (other than policy) identified | No |  |  |
| Criteria for evaluation adequate or clear | No | Criteria do not evaluate health outcomes |  |
| Implementation | Multiple stakeholders involved in the design and implementation of the action/s | Yes | Ministry of Health and Wellness; Ministry of Local Government; Rural Development and the National Strategy Office; Office of the President; Ministry of Environment; Natural Resources Conservation and Tourism (MENT); Gender Affairs Department |  |
| Obligations of the various implementers specified – who has to do what? | No |  |  |

Summary

| **Criteria** | **Quality** |
| --- | --- |
| Policy Background | Needs improvement |
| Goals | Needs improvement |
| Resources | Weak |
| Monitoring and Evaluation | Needs improvement |
| Implementation | Needs improvement |

### **Burkina Faso** – Burkina Faso National Climate Change Adaptation Plan

|  | **Criteria** | **Criterion addressed?** | **Explanation** | **Quote** |
| --- | --- | --- | --- | --- |
| Policy Background | Children recognised as disproportionately affected by the impacts of climate change | Yes | Children are referred to as a vulnerable group | “…women and children will be the groups at highest risk and proactive policies should be adopted for their benefit” |
| Minimum of two context-specific climate-sensitive health risks for children identified | Yes | Climate risk areas: malnutrition and food insecurity; effects on health care facilities | “…flooding might pose a risk to food security if harvests are destroyed, thereby also resulting in increased malnutrition, especially among children.”  “…access to water for women is still a problem on the whole. This impacts on their health and on children’s health in terms of the quality of the water and the physical effort required.” |
| Source of background is explicit  Authority (one or more persons, books, scientific articles or sources of information)  Quantitative or qualitative analysis,  Deduction (premises that have been established from authority, observation, intuition or all three) | No |  |  |
| Goals | Goals for child health explicitly stated | Yes | Improve nutritional status of children through the availability of an adequate quantity of high-quality products | “Improve the nutritional status of the most vulnerable groups (women and children) through the availability of an adequate quantity of high-quality products” |
| Goals are concrete enough (quantitative where possible and qualitative where not) to be evaluated later | Yes | Nutritional status improvements can be quantitatively measured |  |
| Goal is clear in its intent and in the mechanism with which to achieve the desired goals, yet does not attempt to prescribe in detail what the change must be | Yes |  |  |
| Action/s outlined to improve child health | Yes | Preventive malaria treatment for pregnant women and children  Encourage pregnant women to attend prenatal consultations  Increase the availability of high-quality products to improve nutritional statuses of women and children. | “Provide intermittent preventive treatment of malaria using TPI for pregnant women and children and distribute long-lasting insecticidal nets (LLIN) in routine mass campaigns”  “Encourage all pregnant women to attend prenatal consultations at maternal and child health services.” |
| Mechanisms by which children and/or pregnant women will be specifically targeted by the action are explicitly stated | Yes | The actions are specifically conducted on pregnant women and children |  |
| Minimum of two actions | Yes |  |  |
| Actions comprehensively address climate-sensitive health risks identified in policy background | Yes |  |  |
| Resources | Financial resources addressed  Estimated financial resources for implementation of the action/s given  Allocated financial resources for implementation of the action/s clear  Rewards/sanctions for spending allocated resources on other programs | No |  |  |
| Human resources addressed | No |  |  |
| Organisational capacity addressed | No |  |  |
| Policy indicated strategies to mobilise required resources | No |  |  |
| Monitoring and Evaluation | Policy indicated monitoring and evaluation mechanisms to track progress on goals for child health | No |  |  |
| Policy nominated a committee or independent body to do evaluation | No |  |  |
| Outcome measures identified for each of the explicit and implicit objectives | No | Outcome measures are only provided for the objective to improve nutritional status in children. The measure of “nutritional status” is not associated with a quantitative health outcome.  No outcome measures have been associated with actions to prevent malaria and encourage pregnant women to attend prenatal consultations. | “The nutritional status of the most vulnerable groups (women and children) has improved.” |
| Data for evaluation will be collected before, during, and after introduction of the new policy | No |  |  |
| Follow-up takes place after a sufficient period to allow the effects of policy change to become evident | No |  |  |
| Other factors that could have produced the change (other than policy) identified | No |  |  |
| Criteria for evaluation adequate or clear | No |  |  |
| Implementations | Multiple stakeholders involved in the design and implementation of the action/s | No | Unclear who the stakeholders are for the actions outlined above |  |
| Obligations of the various implementers specified – who has to do what? | No |  |  |

Summary

| **Criteria** | **Quality** |
| --- | --- |
| Policy Background | Needs improvement |
| Goals | Needs improvement |
| Resources | Weak |
| Monitoring and Evaluation | Weak |
| Implementation | Weak |

### **Burundi** – Plan National d’Adaptation Initial

|  | **Criteria** | **Criterion addressed?** | **Explanation** | **Quote** |
| --- | --- | --- | --- | --- |
| Policy Background | Children recognised as disproportionately affected by the impacts of climate change | Yes | Children are described as a vulnerable population |  |
| Minimum of two context-specific climate-sensitive health risks for children identified | Yes | Climate risk areas: vector-borne diseases, malnutrition and food insecurity | “According to the TCNCC (2019), climate change is likely to increase vulnerability in the health sector, resulting in a growing number of vulnerable populations (children…), particularly to malaria and malnutrition.” |
| Source of background is explicit  Authority (one or more persons, books, scientific articles or sources of information)  Quantitative or qualitative analysis,  Deduction (premises that have been established from authority, observation, intuition or all three) | Yes | TCNCC |  |
| Goals | Goals for child health explicitly stated | No |  |  |
| Goals are concrete enough (quantitative where possible and qualitative where not) to be evaluated later | No |  |  |
| Goal is clear in its intent and in the mechanism with which to achieve the desired goals, yet does not attempt to prescribe in detail what the change must be | No |  |  |
| Action/s outlined to improve child health | No |  |  |
| Mechanisms by which children and/or pregnant women will be specifically targeted by the action are explicitly stated | No |  |  |
| Minimum of two actions | No |  |  |
| Actions comprehensively address climate-sensitive health risks identified in policy background | No |  |  |
| Resources | Financial resources addressed  Estimated financial resources for implementation of the action/s given  Allocated financial resources for implementation of the action/s clear  Rewards/sanctions for spending allocated resources on other programs | No |  |  |
| Human resources addressed | No |  |  |
| Organisational capacity addressed | No |  |  |
| Policy indicated strategies to mobilise required resources | No |  |  |
| Monitoring and Evaluation | Policy indicated monitoring and evaluation mechanisms to track progress on goals for child health | No |  |  |
| Policy nominated a committee or independent body to do evaluation | No |  |  |
| Outcome measures identified for each of the explicit and implicit objectives | No |  |  |
| Data for evaluation will be collected before, during, and after introduction of the new policy | No |  |  |
| Follow-up takes place after a sufficient period to allow the effects of policy change to become evident | No |  |  |
| Other factors that could have produced the change (other than policy) identified | No |  |  |
| Criteria for evaluation adequate or clear | No |  |  |
| Implementation | Multiple stakeholders involved in the design and implementation of the action/s | No |  |  |
| Obligations of the various implementers specified – who has to do what? | No |  |  |

Summary

| **Criteria** | **Quality** |
| --- | --- |
| Policy Background | Strong |
| Goals | Weak |
| Resources | Weak |
| Monitoring and Evaluation | Weak |
| Implementation | Weak |

### **Cabo Verde** – National Adaptation Plan of Cabo Verde

|  | **Criteria** | **Criterion addressed?** | **Explanation** | **Quote** |
| --- | --- | --- | --- | --- |
| Policy Background | Children recognised as disproportionately affected by the impacts of climate change | Yes | Under section “Greater and Better Participation of the Most Vulnerable” | “…climate change particularly affects women and single-parent families represented by women, children… who have less adaptive capacity…” |
| Minimum of two context-specific climate-sensitive health risks for children identified | No | No descriptions of specific health impacts |  |
| Source of background is explicit  Authority (one or more persons, books, scientific articles or sources of information)  Quantitative or qualitative analysis,  Deduction (premises that have been established from authority, observation, intuition or all three) | No |  |  |
| Goals | Goals for child health explicitly stated | No |  |  |
| Goals are concrete enough (quantitative where possible and qualitative where not) to be evaluated later | No |  |  |
| Goal is clear in its intent and in the mechanism with which to achieve the desired goals, yet does not attempt to prescribe in detail what the change must be | No |  |  |
| Action/s outlined to improve child health | Yes | As part of their Communication Plan to “mobilise various actors for action to strengthen climate resilience”, the initiative “Living laboratories” is outlined.  The initiative targets “…youth from fishing, agricultural, coastal, and rural communities… Health students from all related fields”. Communication tools include artivism, eco-design and branding, tactical urbanism, rubric in television and radio, documentaries, campaigns on social networks, outdoor advertising, exhibitions, and communication by ambassadors and influencers. Health is one of five areas that will be focused on.  Revising primary and secondary school curricula to cover climate risks, resilience and adaptation was outlined, but no reference to health was made. | “Implementation of innovative experiences within the adaptation measure 10-pilot projects, which may be replicated in other municipalities. Areas: …health” |
| Mechanisms by which children and/or pregnant women will be specifically targeted by the action are explicitly stated | No |  |  |
| Minimum of two actions | No |  |  |
| Actions comprehensively address climate-sensitive health risks identified in policy background | No |  |  |
| Resources | Financial resources addressed  Estimated financial resources for implementation of the action/s given  Allocated financial resources for implementation of the action/s clear  Rewards/sanctions for spending allocated resources on other programs | No | No costs were estimated specifically for Living laboratories. The implementation of the communication programme is estimated to be €1,850,000 total. |  |
| Human resources addressed | No |  |  |
| Organisational capacity addressed | No |  |  |
| Policy indicated strategies to mobilise required resources | No |  |  |
| Monitoring and Evaluation | Policy indicated monitoring and evaluation mechanisms to track progress on goals for child health | Yes | No specific child health goals were outlined, but monitoring and evaluation mechanisms for the communication programme that are relevant to children were outlined. | “Number of live laboratories implemented; Number of communities directly impacted, by… age characterization... Number of participants by themes and municipalities, by… age… Number of people sensitized, disaggregated by age group…” |
| Policy nominated a committee or independent body to do evaluation | Yes | MAA Communication Office and related institutions |  |
| Outcome measures identified for each of the explicit and implicit objectives | Yes |  |  |
| Data for evaluation will be collected before, during, and after introduction of the new policy | No | Times for data collection have not been specified. |  |
| Follow-up takes place after a sufficient period to allow the effects of policy change to become evident | No |  |  |
| Other factors that could have produced the change (other than policy) identified | No |  |  |
| Criteria for evaluation adequate or clear | No | No specific reference to health outcomes has been made. |  |
| Implementation | Multiple stakeholders involved in the design and implementation of the action/s | No | Examples of adaptation actions to be implemented by different actors are provided. It is unclear which actors will specifically be responsible for the communication initiative for youth.  Government and community-based organisations are stated to be involved in project implementation, which may include Living laboratories (unclear).  For the communication programme as a whole, the MAA Communication Office and all related institutions are responsible. | “Government… project design and implementation”  “Community-based organizations… support and cooperation in the implementation of programs and projects”  “Leading institution: MAA Communication Office. Contributing institutions: All related” |
| Obligations of the various implementers specified – who has to do what? | No |  |  |

Summary

| **Criteria** | **Quality** |
| --- | --- |
| Policy Background | Needs improvement |
| Goals | Needs improvement |
| Resources | Weak |
| Monitoring and Evaluation | Needs improvement |
| Implementation | Weak |

###

### **Cameroon** – Plan National d’Adaptation aux Changements Climatiques du Cameroun

|  | **Criteria** | **Criterion addressed?** | **Explanation** | **Quote** |
| --- | --- | --- | --- | --- |
| Policy Background | Children recognised as disproportionately affected by the impacts of climate change | Yes |  | “[young children and other vulnerable populations] are often the most sensitive to climate risks and the least able to cope with them, as they are poor and/or dependent.” |
| Minimum of two context-specific climate-sensitive health risks for children identified | No | Climate risk: heat-related illnesses | “Increased risk of heat-related mortality (for children…)” |
| Source of background is explicit  Authority (one or more persons, books, scientific articles or sources of information)  Quantitative or qualitative analysis,  Deduction (premises that have been established from authority, observation, intuition or all three) | Yes | Vulnerability assessment |  |
| Goals | Goals for child health explicitly stated | Yes |  | “Reduce the vulnerability of fragile, vulnerable or marginalized populations, and strengthen their capacities, autonomy and independence. Ensure a social protection system and encourage national solidarity.”  “Anticipating climate-related disasters and ensuring that vulnerable populations are taken into account in disaster management plans.” |
| Goals are concrete enough (quantitative where possible and qualitative where not) to be evaluated later | No | No measurable health outcome has been provided |  |
| Goal is clear in its intent and in the mechanism with which to achieve the desired goals, yet does not attempt to prescribe in detail what the change must be | No |  |  |
| Action/s outlined to improve child health | Yes | Actions are targeted towards “vulnerable groups”, which has been previously stated to include children.  Actions centre around disaster risk management. Vaccination and limiting exposure to diseases is also provided. | “Adapt government programs, including emergency response plans and programs for vulnerable groups, to better address the impacts of climate change on these groups.”  “Adapt public services, including the construction of schools and hospitals, to the effects of common climatic hazards (storms, heat waves, floods, drought, etc.)”  “Make vulnerable populations aware of climate change and their own vulnerability, and train them to act in the event of disasters/extreme events.”  “Intensify immunization of children, young people and pregnant women (vaccination) and limit their exposure to diseases linked to climate change (diarrhea, malaria, itching, coughs, colds, cholera, measles, typhoid etc.)”  “Raise public awareness of the spirit of solidarity and mutual aid”  “Encourage faith-based and civil society organizations to provide welfare programs and other forms of support to address climate change-induced needs of vulnerable groups”  “Strengthen the country’s capacity to anticipate climate-related disasters and their impact on internal migration and security, particularly for vulnerable groups.” |
| Mechanisms by which children and/or pregnant women will be specifically targeted by the action are explicitly stated | No | More detail is needed on how children and/or pregnant women will be targeted for actions that refer broadly to “vulnerable groups”. |  |
| Minimum of two actions | Yes |  |  |
| Actions comprehensively address climate-sensitive health risks identified in policy background | No |  |  |
| Resources | Financial resources addressed  Estimated financial resources for implementation of the action/s given  Allocated financial resources for implementation of the action/s clear  Rewards/sanctions for spending allocated resources on other programs | Yes | Budget of 2 million euros |  |
| Human resources addressed | No |  |  |
| Organisational capacity addressed | No |  |  |
| Policy indicated strategies to mobilise required resources | Yes | A financing plan is described, with input from the public investment budget, regional and international financing, the private sector, and partnerships. |  |
| Monitoring and Evaluation | Policy indicated monitoring and evaluation mechanisms to track progress on goals for child health | Yes |  |  |
| Policy nominated a committee or independent body to do evaluation | Yes | The Ecological Monitoring and Climate-Monitoring Sub-Directorate |  |
| Outcome measures identified for each of the explicit and implicit objectives | No | More detail needed. | “Awareness rate among vulnerable groups” |
| Data for evaluation will be collected before, during, and after introduction of the new policy | No | Data was not collected before the introduction of the policy. |  |
| Follow-up takes place after a sufficient period to allow the effects of policy change to become evident | Yes | Five-year reviews are planned: a mid-term assessment, end-of-phase assessment, and retrospective assessment |  |
| Other factors that could have produced the change (other than policy) identified | No |  |  |
| Criteria for evaluation adequate or clear | No |  |  |
| Implementation | Multiple stakeholders involved in the design and implementation of the action/s | Yes | The Ministry for the Promotion of Women and the Family; the Ministry of Social Affairs; the Ministry of Youth |  |
| Obligations of the various implementers specified – who has to do what? | Yes |  | “The Ministry for the Promotion of Women and the Family (MINPROFF), the Ministry of Social Affairs (MINAS) and the Ministry of Youth (MINJEC) must have awareness-raising programs and ensure that vulnerable groups are taken care of in the event of disasters or the impact of climate change on these groups. MINSANTE must develop an immunization program for children, and to cerebrospinal meningitis.” |

Summary

| **Criteria** | **Quality** |
| --- | --- |
| Policy Background | Needs improvement |
| Goals | Needs improvement |
| Resources | Needs improvement |
| Monitoring and Evaluation | Needs improvement |
| Implementation | Strong |

### **Central African Republic** – Plan National Initial d’Adaptation aux Changements Climatiques de la République Centrafricaine

|  | **Criteria** | **Criterion addressed?** | **Explanation** | **Quote** |
| --- | --- | --- | --- | --- |
| Policy Background | Children recognised as disproportionately affected by the impacts of climate change | Yes |  | “Young people are vulnerable, all the more so as the prospect of an uncertain future makes them "vectors of new unrest and social and intercommunity conflict", according to a report by the United Nations Population Fund” |
| Minimum of two context-specific climate-sensitive health risks for children identified | No |  |  |
| Source of background is explicit  Authority (one or more persons, books, scientific articles or sources of information)  Quantitative or qualitative analysis,  Deduction (premises that have been established from authority, observation, intuition or all three) | Yes | Report by the United Nations Population Fund |  |
| Goals | Goals for child health explicitly stated | No |  |  |
| Goals are concrete enough (quantitative where possible and qualitative where not) to be evaluated later | No |  |  |
| Goal is clear in its intent and in the mechanism with which to achieve the desired goals, yet does not attempt to prescribe in detail what the change must be | No |  |  |
| Action/s outlined to improve child health | No | “Integrate basic notions of climate change into primary and secondary school curricula” is provided but it is unclear whether this includes health information. |  |
| Mechanisms by which children and/or pregnant women will be specifically targeted by the action are explicitly stated | No |  |  |
| Minimum of two actions | No |  |  |
| Actions comprehensively address climate-sensitive health risks identified in policy background | No |  |  |
| Resources | Financial resources addressed  Estimated financial resources for implementation of the action/s given  Allocated financial resources for implementation of the action/s clear  Rewards/sanctions for spending allocated resources on other programs | No |  |  |
| Human resources addressed | No |  |  |
| Organisational capacity addressed | No |  |  |
| Policy indicated strategies to mobilise required resources | No |  |  |
| Monitoring and Evaluation | Policy indicated monitoring and evaluation mechanisms to track progress on goals for child health | No |  |  |
| Policy nominated a committee or independent body to do evaluation | No |  |  |
| Outcome measures identified for each of the explicit and implicit objectives | No |  |  |
| Data for evaluation will be collected before, during, and after introduction of the new policy | No |  |  |
| Follow-up takes place after a sufficient period to allow the effects of policy change to become evident | No |  |  |
| Other factors that could have produced the change (other than policy) identified | No |  |  |
| Criteria for evaluation adequate or clear | No |  |  |
| Implementation | Multiple stakeholders involved in the design and implementation of the action/s | No |  |  |
| Obligations of the various implementers specified – who has to do what? | No |  |  |

Summary

| **Criteria** | **Quality** |
| --- | --- |
| Policy Background | Weak |
| Goals | Weak |
| Resources | Weak |
| Monitoring and Evaluation | Weak |
| Implementation | Weak |

### **Chad** – First National Climate Change Adaptation Plan of Chad

|  | **Criteria** | **Criterion addressed?** | **Explanation** | **Quote** |
| --- | --- | --- | --- | --- |
| Policy Background | Children recognised as disproportionately affected by the impacts of climate change | Yes |  |  |
| Minimum of two context-specific climate-sensitive health risks for children identified | Yes | Climate risk areas identified: malnutrition and food insecurity; effects on health systems; extreme weather events; heat-related illnesses | “…diarrhoeal diseases remain the leading cause of premature mortality in Chad, which has the highest mortality rate attributable to diarrhoeal diseases among children under 5 years of age in sub-Saharan Africa.”  “Climate change is also likely to aggravate difficulties in accessing basic health services, high mortality rates (i.e. infant, child, maternal and senile mortality) and low life expectancy at birth.”  “[the education sector] is also directly impacted by extreme weather events (e.g. floods, heat waves, etc.) which can lead to the deaths of school children and teachers or impact school infrastructure. It is important to note that children are particularly vulnerable to the impacts of climate change. They are physically more vulnerable and less able to withstand and survive shocks such as floods, droughts, severe weather and heat waves.” |
| Source of background is explicit  Authority (one or more persons, books, scientific articles or sources of information)  Quantitative or qualitative analysis,  Deduction (premises that have been established from authority, observation, intuition or all three) | No |  |  |
| Goals | Goals for child health explicitly stated | No |  |  |
| Goals are concrete enough (quantitative where possible and qualitative where not) to be evaluated later | No |  |  |
| Goal is clear in its intent and in the mechanism with which to achieve the desired goals, yet does not attempt to prescribe in detail what the change must be | No |  |  |
| Action/s outlined to improve child health | Yes | Various programmes to improve nutrition and food security | Programmes/project titles:  “Support to women producers of local fortified food for children aged 6 to 23 months in Chad”  “Strengthening nutritional security in the districts of Mao, Mondo, Moussoro, Chadra and Michemiré-Kanem and Bahr el Gazel Regions, Chad… [beneficiaries include] children under 5 years and pregnant and lactating women”  “Support for the medical and nutritional care of children under 5 years of age and for the maternal health of pregnant and breastfeeding women in N’Djamena and in the districts of N’Gouri and Isserom”  “Support project for populations vulnerable to food and nutrition insecurity in the Batha region… Emergency livelihood support: agropastoral inputs, training in organizing village savings and loan associations, training in vegetable production; Cash transfers: cash distribution; Training of livestock auxiliaries, plant protection officers, local action committees and village development committees”  “Improve the prevention and management of global acute malnutrition in children under 5 years of age and pregnant and lactating women”  “Integrated approach to improving the management of severe acute malnutrition in Chad”  “Local production of complementary foods for children from 6 to 24 months”  “Prevention of acute malnutrition (Sahel)”  “Treatment of malnutrition (crisis response – treatment)”  “Provide and improve humanitarian assistance focused on health, nutrition and protection to emergency affected populations in the Lake Chad region”  “Reduce acute malnutrition of children under five in N’Djamena”  “Emergency support to affected populations” |
| Mechanisms by which children and/or pregnant women will be specifically targeted by the action are explicitly stated | Yes |  |  |
| Minimum of two actions | Yes |  |  |
| Actions comprehensively address climate-sensitive health risks identified in policy background | No |  |  |
| Resources | Financial resources addressed  Estimated financial resources for implementation of the action/s given  Allocated financial resources for implementation of the action/s clear  Rewards/sanctions for spending allocated resources on other programs | Yes | Costs have been estimated for each project – e.g $0.341 million to support women producers of local fortified food |  |
| Human resources addressed | No |  |  |
| Organisational capacity addressed | No |  |  |
| Policy indicated strategies to mobilise required resources | Yes | The UN Food and Agricultural Organisation will provide funding |  |
| Monitoring and Evaluation | Policy indicated monitoring and evaluation mechanisms to track progress on goals for child health | No |  |  |
| Policy nominated a committee or independent body to do evaluation | No |  |  |
| Outcome measures identified for each of the explicit and implicit objectives | No |  |  |
| Data for evaluation will be collected before, during, and after introduction of the new policy | No |  |  |
| Follow-up takes place after a sufficient period to allow the effects of policy change to become evident | No |  |  |
| Other factors that could have produced the change (other than policy) identified | No |  |  |
| Criteria for evaluation adequate or clear | No |  |  |
| Implementation | Multiple stakeholders involved in the design and implementation of the action/s | Yes | Actions above executed by WFP; Action Against Hunger; Alliance for International Medical Action; Solidarity; PMI; UNICEF; Ministry of Women, Protection of Early Childhood and National Solidarity |  |
| Obligations of the various implementers specified – who has to do what? | Yes | The implementers of each project are clear |  |

Summary

| **Criteria** | **Quality** |
| --- | --- |
| Policy Background | Needs improvement |
| Goals | Needs improvement |
| Resources | Needs improvement |
| Monitoring and Evaluation | Weak |
| Implementation | Strong |

### **Comoros** – Contribution Determinee au Niveau National 2021-2030

|  | **Criteria** | **Criterion addressed?** | **Explanation** | **Quote** |
| --- | --- | --- | --- | --- |
| Policy Background | Children recognised as disproportionately affected by the impacts of climate change | No |  |  |
| Minimum of two context-specific climate-sensitive health risks for children identified | No |  |  |
| Source of background is explicit  Authority (one or more persons, books, scientific articles or sources of information)  Quantitative or qualitative analysis,  Deduction (premises that have been established from authority, observation, intuition or all three) | No |  |  |
| Goals | Goals for child health explicitly stated | No |  |  |
| Goals are concrete enough (quantitative where possible and qualitative where not) to be evaluated later | No |  |  |
| Goal is clear in its intent and in the mechanism with which to achieve the desired goals, yet does not attempt to prescribe in detail what the change must be | No |  |  |
| Action/s outlined to improve child health | No |  |  |
| Mechanisms by which children and/or pregnant women will be specifically targeted by the action are explicitly stated | No |  |  |
| Minimum of two actions | No |  |  |
| Actions comprehensively address climate-sensitive health risks identified in policy background | No |  |  |
| Resources | Financial resources addressed  Estimated financial resources for implementation of the action/s given  Allocated financial resources for implementation of the action/s clear  Rewards/sanctions for spending allocated resources on other programs | No |  |  |
| Human resources addressed | No |  |  |
| Organisational capacity addressed | No |  |  |
| Policy indicated strategies to mobilise required resources | No |  |  |
| Monitoring and Evaluation | Policy indicated monitoring and evaluation mechanisms to track progress on goals for child health | No |  |  |
| Policy nominated a committee or independent body to do evaluation | No |  |  |
| Outcome measures identified for each of the explicit and implicit objectives | No |  |  |
| Data for evaluation will be collected before, during, and after introduction of the new policy | No |  |  |
| Follow-up takes place after a sufficient period to allow the effects of policy change to become evident | No |  |  |
| Other factors that could have produced the change (other than policy) identified | No |  |  |
| Criteria for evaluation adequate or clear | No |  |  |
| Implementation | Multiple stakeholders involved in the design and implementation of the action/s | No |  |  |
| Obligations of the various implementers specified – who has to do what? | No |  |  |

Summary

| **Criteria** | **Quality** |
| --- | --- |
| Policy Background | Weak |
| Goals | Weak |
| Resources | Weak |
| Monitoring and Evaluation | Weak |
| Implementation | Weak |

### **Congo** – Contribution Determinee au Niveau National de la Republique du Congo

|  | **Criteria** | **Criterion addressed?** | **Explanation** | **Quote** |
| --- | --- | --- | --- | --- |
| Policy Background | Children recognised as disproportionately affected by the impacts of climate change | No |  |  |
| Minimum of two context-specific climate-sensitive health risks for children identified | No |  |  |
| Source of background is explicit  Authority (one or more persons, books, scientific articles or sources of information)  Quantitative or qualitative analysis,  Deduction (premises that have been established from authority, observation, intuition or all three) | No |  |  |
| Goals | Goals for child health explicitly stated | No |  |  |
| Goals are concrete enough (quantitative where possible and qualitative where not) to be evaluated later | No |  |  |
| Goal is clear in its intent and in the mechanism with which to achieve the desired goals, yet does not attempt to prescribe in detail what the change must be | No |  |  |
| Action/s outlined to improve child health | No |  |  |
| Mechanisms by which children and/or pregnant women will be specifically targeted by the action are explicitly stated | No |  |  |
| Minimum of two actions | No |  |  |
| Actions comprehensively address climate-sensitive health risks identified in policy background | No |  |  |
| Resources | Financial resources addressed  Estimated financial resources for implementation of the action/s given  Allocated financial resources for implementation of the action/s clear  Rewards/sanctions for spending allocated resources on other programs | No |  |  |
| Human resources addressed | No |  |  |
| Organisational capacity addressed | No |  |  |
| Policy indicated strategies to mobilise required resources | No |  |  |
| Monitoring and Evaluation | Policy indicated monitoring and evaluation mechanisms to track progress on goals for child health | No |  |  |
| Policy nominated a committee or independent body to do evaluation | No |  |  |
| Outcome measures identified for each of the explicit and implicit objectives | No |  |  |
| Data for evaluation will be collected before, during, and after introduction of the new policy | No |  |  |
| Follow-up takes place after a sufficient period to allow the effects of policy change to become evident | No |  |  |
| Other factors that could have produced the change (other than policy) identified | No |  |  |
| Criteria for evaluation adequate or clear | No |  |  |
| Implementation | Multiple stakeholders involved in the design and implementation of the action/s | No |  |  |
| Obligations of the various implementers specified – who has to do what? | No |  |  |

Summary

| **Criteria** | **Quality** |
| --- | --- |
| Policy Background | Weak |
| Goals | Weak |
| Resources | Weak |
| Monitoring and Evaluation | Weak |
| Implementation | Weak |

### **Côte d'Ivoire** – Contributions Déterminées au niveau National (CDN) de la Côte d'Ivoire

|  | **Criteria** | **Criterion addressed?** | **Explanation** | **Quote** |
| --- | --- | --- | --- | --- |
| Policy Background | Children recognised as disproportionately affected by the impacts of climate change | No |  |  |
| Minimum of two context-specific climate-sensitive health risks for children identified | No | Climate risks: heat-related illnesses | “increased extreme heat waves with intense effects on pregnant women…” |
| Source of background is explicit  Authority (one or more persons, books, scientific articles or sources of information)  Quantitative or qualitative analysis,  Deduction (premises that have been established from authority, observation, intuition or all three) | No |  |  |
| Goals | Goals for child health explicitly stated | No |  |  |
| Goals are concrete enough (quantitative where possible and qualitative where not) to be evaluated later | No |  |  |
| Goal is clear in its intent and in the mechanism with which to achieve the desired goals, yet does not attempt to prescribe in detail what the change must be | No |  |  |
| Action/s outlined to improve child health | No |  |  |
| Mechanisms by which children and/or pregnant women will be specifically targeted by the action are explicitly stated | No |  |  |
| Minimum of two actions | No |  |  |
| Actions comprehensively address climate-sensitive health risks identified in policy background | No |  |  |
| Resources | Financial resources addressed  Estimated financial resources for implementation of the action/s given  Allocated financial resources for implementation of the action/s clear  Rewards/sanctions for spending allocated resources on other programs | No |  |  |
| Human resources addressed | No |  |  |
| Organisational capacity addressed | No |  |  |
| Policy indicated strategies to mobilise required resources | No |  |  |
| Monitoring and Evaluation | Policy indicated monitoring and evaluation mechanisms to track progress on goals for child health | No |  |  |
| Policy nominated a committee or independent body to do evaluation | No |  |  |
| Outcome measures identified for each of the explicit and implicit objectives | No |  |  |
| Data for evaluation will be collected before, during, and after introduction of the new policy | No |  |  |
| Follow-up takes place after a sufficient period to allow the effects of policy change to become evident | No |  |  |
| Other factors that could have produced the change (other than policy) identified | No |  |  |
| Criteria for evaluation adequate or clear | No |  |  |
| Implementation | Multiple stakeholders involved in the design and implementation of the action/s | No |  |  |
| Obligations of the various implementers specified – who has to do what? | No |  |  |

Summary

| **Criteria** | **Quality** |
| --- | --- |
| Policy Background | Weak |
| Goals | Weak |
| Resources | Weak |
| Monitoring and Evaluation | Weak |
| Implementation | Weak |

### **Democratic Republic of Congo** – National Adaptation Plan to Climate Change (2022-2026)

|  | **Criteria** | **Criterion addressed?** | **Explanation** | **Quote** |
| --- | --- | --- | --- | --- |
| Policy Background | Children recognised as disproportionately affected by the impacts of climate change | Yes |  |  |
| Minimum of two context-specific climate-sensitive health risks for children identified | Yes | Climate risk areas identified: malnutrition and food insecurity; heat-related illnesses; water- and food-borne diseases; vector-borne diseases | “…total yields will not be sufficient to feed the rapidly growing population of the country: the number of malnourished children will increase under all climate change scenarios”  “…children and young people already suffer from [the increasingly severe effects of climate change] due to their metabolic, physiological and developmental needs. This implies, for example, that forced displacement that affects a range of rights – from the right to water, sanitation and food, to the right to adequate housing, education and development – will probably affect children to a greater degree.”  “[increases in temperature will potentially lead to] increased mortality and morbidity rate in women and children from 0 to 5”  “[Increased temperatures during the rainy season lead to] exposure of populations, men, women and children, to diseases, particularly cholera, malaria, typhoid fevers, and measles”  “[Lack of drinking water infrastructures means that] women and children are exposed to water- and food-borne diseases (intestinal worms)” |
| Source of background is explicit  Authority (one or more persons, books, scientific articles or sources of information)  Quantitative or qualitative analysis,  Deduction (premises that have been established from authority, observation, intuition or all three) | No | Unclear where above information was drawn from – some statements seem to be based on opinion |  |
| Goals | Goals for child health explicitly stated | No |  |  |
| Goals are concrete enough (quantitative where possible and qualitative where not) to be evaluated later | No |  |  |
| Goal is clear in its intent and in the mechanism with which to achieve the desired goals, yet does not attempt to prescribe in detail what the change must be | No |  |  |
| Action/s outlined to improve child health | Yes | In response to the potential increases in mortality and morbidity rates in women and children from 0 to 5, various agricultural adaptations, targeted public health services and improving water quality and distribution are proposed. Two specific projects are outlined below.  “*Improving Women’s and Children’s Resilience and Capacity to Adapt to Climate Change in the DRC*”: a project that focused on livelihood activities while providing information and adaptation options on the impacts of climate change on women and vulnerable groups  “*Building the resilience and ability to adapt of women and children to changing climate in Democratic Republic of Congo*”: a project for diversifying sustainable household practices and capacity building | “Promotion of diversity and crop rotation; Adoption of climate-smart agriculture: improve irrigation systems; Reforestation; Improved treatment and distribution of water; Public health services targeting populations at risk”  “Improving Women’s and Children’s Resilience and Capacity to Adapt to Climate Change in the DRC, US$4.725.000, 2014–2019, LDCF. The project was implemented in 5 municipalities of Kwilu (formerly Bandududu), Kongo Central, Lumumbashi (formerly Katanga) and Kasaï Oriental. Although it focuses on livelihood activities, it provides additional information on the impacts of climate change on women and vulnerable groups, and on adaptation options.”  “Building the resilience and ability to adapt of women and children to changing climate in Democratic Republic of Congo, US$4,725,000, 2015–2020, LDCF. The project has two components: Component 1: Diversifying sustainable household practices, under which diversified agricultural practices (integrated fish farming, cattle and goat farming, irrigated agriculture, etc.) and the processing of agricultural production are supported, with the additional support of agrometeorological information; and Component 2: Building key capacities to carry out climate change-resilient activities, within the framework of which capacity-building actions are supported, in particular by improving the production of adapted seeds, technology transfers, and the training of women who process agricultural products (including fish farming products), and the training of community radio operators.” |
| Mechanisms by which children and/or pregnant women will be specifically targeted by the action are explicitly stated | Yes | The two projects aim to build the capacity of women to build resilience to climate change and support their children |  |
| Minimum of two actions | Yes |  |  |
| Actions comprehensively address climate-sensitive health risks identified in policy background | No |  |  |
| Resources | Financial resources addressed  Estimated financial resources for implementation of the action/s given  Allocated financial resources for implementation of the action/s clear  Rewards/sanctions for spending allocated resources on other programs | Yes | Improving Women and Children’s Resilience and Capacity to Adapt to Climate Change in the DRC: US $4,725,000  Building the resilience and ability to adapt of women and children to changing climate in Democratic Republic of Congo, US$4,725,000 |  |
| Human resources addressed | No |  |  |
| Organisational capacity addressed | No |  |  |
| Policy indicated strategies to mobilise required resources | No | No clear plan for sustainable funding for the initiatives |  |
| Monitoring and Evaluation | Policy indicated monitoring and evaluation mechanisms to track progress on goals for child health | No |  |  |
| Policy nominated a committee or independent body to do evaluation | No |  |  |
| Outcome measures identified for each of the explicit and implicit objectives | No |  |  |
| Data for evaluation will be collected before, during, and after introduction of the new policy | No |  |  |
| Follow-up takes place after a sufficient period to allow the effects of policy change to become evident | No |  |  |
| Other factors that could have produced the change (other than policy) identified | No |  |  |
| Criteria for evaluation adequate or clear | No |  |  |
| Implementation | Multiple stakeholders involved in the design and implementation of the action/s | No | Stakeholders for above actions are not explicitly stated |  |
| Obligations of the various implementers specified – who has to do what? | No |  |  |

Summary

| **Criteria** | **Quality** |
| --- | --- |
| Policy Background | Needs improvement |
| Goals | Needs improvement |
| Resources | Needs improvement |
| Monitoring and Evaluation | Weak |
| Implementation | Weak |

### **Equatorial Guinea** – Contribuciones Determinadas a Nivel Nacional

|  | **Criteria** | **Criterion addressed?** | **Explanation** | **Quote** |
| --- | --- | --- | --- | --- |
| Policy Background | Children recognised as disproportionately affected by the impacts of climate change | No |  |  |
| Minimum of two context-specific climate-sensitive health risks for children identified | No |  |  |
| Source of background is explicit  Authority (one or more persons, books, scientific articles or sources of information)  Quantitative or qualitative analysis,  Deduction (premises that have been established from authority, observation, intuition or all three) | No |  |  |
| Goals | Goals for child health explicitly stated | No |  |  |
| Goals are concrete enough (quantitative where possible and qualitative where not) to be evaluated later | No |  |  |
| Goal is clear in its intent and in the mechanism with which to achieve the desired goals, yet does not attempt to prescribe in detail what the change must be | No |  |  |
| Action/s outlined to improve child health | No |  |  |
| Mechanisms by which children and/or pregnant women will be specifically targeted by the action are explicitly stated | No |  |  |
| Minimum of two actions | No |  |  |
| Actions comprehensively address climate-sensitive health risks identified in policy background | No |  |  |
| Resources | Financial resources addressed  Estimated financial resources for implementation of the action/s given  Allocated financial resources for implementation of the action/s clear  Rewards/sanctions for spending allocated resources on other programs | No |  |  |
| Human resources addressed | No |  |  |
| Organisational capacity addressed | No |  |  |
| Policy indicated strategies to mobilise required resources | No |  |  |
| Monitoring and Evaluation | Policy indicated monitoring and evaluation mechanisms to track progress on goals for child health | No |  |  |
| Policy nominated a committee or independent body to do evaluation | No |  |  |
| Outcome measures identified for each of the explicit and implicit objectives | No |  |  |
| Data for evaluation will be collected before, during, and after introduction of the new policy | No |  |  |
| Follow-up takes place after a sufficient period to allow the effects of policy change to become evident | No |  |  |
| Other factors that could have produced the change (other than policy) identified | No |  |  |
| Criteria for evaluation adequate or clear | No |  |  |
| Implementation | Multiple stakeholders involved in the design and implementation of the action/s | No |  |  |
| Obligations of the various implementers specified – who has to do what? | No |  |  |

Summary

| **Criteria** | **Quality** |
| --- | --- |
| Policy Background | Weak |
| Goals | Weak |
| Resources | Weak |
| Monitoring and Evaluation | Weak |
| Implementation | Weak |

### **Eritrea** – Nationally Determined Contributions (NDCs) Report to UNFCCC

|  | **Criteria** | **Criterion addressed?** | **Explanation** | **Quote** |
| --- | --- | --- | --- | --- |
| Policy Background | Children recognised as disproportionately affected by the impacts of climate change | No |  |  |
| Minimum of two context-specific climate-sensitive health risks for children identified | No |  |  |
| Source of background is explicit  Authority (one or more persons, books, scientific articles or sources of information)  Quantitative or qualitative analysis,  Deduction (premises that have been established from authority, observation, intuition or all three) | No |  |  |
| Goals | Goals for child health explicitly stated | No |  |  |
| Goals are concrete enough (quantitative where possible and qualitative where not) to be evaluated later | No |  |  |
| Goal is clear in its intent and in the mechanism with which to achieve the desired goals, yet does not attempt to prescribe in detail what the change must be | No |  |  |
| Action/s outlined to improve child health | Yes | Energy saving cooking stoves for rural households have been implemented | “…the government of Eritrea has already taken concrete measures to introduce energy saving cooking stoves for rural households… the advantages of these stoves lie in… securing the health and wellbeing of women and children” |
| Mechanisms by which children and/or pregnant women will be specifically targeted by the action are explicitly stated | Yes | Cooking stoves have been introduced in rural households |  |
| Minimum of two actions | No |  |  |
| Actions comprehensively address climate-sensitive health risks identified in policy background | No |  |  |
| Resources | Financial resources addressed  Estimated financial resources for implementation of the action/s given  Allocated financial resources for implementation of the action/s clear  Rewards/sanctions for spending allocated resources on other programs | No |  |  |
| Human resources addressed | No |  |  |
| Organisational capacity addressed | No |  |  |
| Policy indicated strategies to mobilise required resources | No |  |  |
| Monitoring and Evaluation | Policy indicated monitoring and evaluation mechanisms to track progress on goals for child health | No |  |  |
| Policy nominated a committee or independent body to do evaluation | No |  |  |
| Outcome measures identified for each of the explicit and implicit objectives | No |  |  |
| Data for evaluation will be collected before, during, and after introduction of the new policy | No |  |  |
| Follow-up takes place after a sufficient period to allow the effects of policy change to become evident | No |  |  |
| Other factors that could have produced the change (other than policy) identified | No |  |  |
| Criteria for evaluation adequate or clear | No |  |  |
| Implementation | Multiple stakeholders involved in the design and implementation of the action/s | No |  |  |
| Obligations of the various implementers specified – who has to do what? | No |  |  |

Summary

| **Criteria** | **Quality** |
| --- | --- |
| Policy Background | Weak |
| Goals | Needs improvement |
| Resources | Weak |
| Monitoring and Evaluation | Weak |
| Implementation | Weak |

### **Eswatini** – Swaziland National Climate Change Policy, 2016

|  | **Criteria** | **Criterion addressed?** | **Explanation** | **Quote** |
| --- | --- | --- | --- | --- |
| Policy Background | Children recognised as disproportionately affected by the impacts of climate change | Yes |  | “While all populations are vulnerable to climate-induced health risks, the populations most at risk include: …children… as a result of their limited adaptive capacity” |
| Minimum of two context-specific climate-sensitive health risks for children identified | No |  |  |
| Source of background is explicit  Authority (one or more persons, books, scientific articles or sources of information)  Quantitative or qualitative analysis,  Deduction (premises that have been established from authority, observation, intuition or all three) | No |  |  |
| Goals | Goals for child health explicitly stated | No |  |  |
| Goals are concrete enough (quantitative where possible and qualitative where not) to be evaluated later | No |  |  |
| Goal is clear in its intent and in the mechanism with which to achieve the desired goals, yet does not attempt to prescribe in detail what the change must be | No |  |  |
| Action/s outlined to improve child health | No |  |  |
| Mechanisms by which children and/or pregnant women will be specifically targeted by the action are explicitly stated | No |  |  |
| Minimum of two actions | No |  |  |
| Actions comprehensively address climate-sensitive health risks identified in policy background | No |  |  |
| Resources | Financial resources addressed  Estimated financial resources for implementation of the action/s given  Allocated financial resources for implementation of the action/s clear  Rewards/sanctions for spending allocated resources on other programs | No |  |  |
| Human resources addressed | No |  |  |
| Organisational capacity addressed | No |  |  |
| Policy indicated strategies to mobilise required resources | No |  |  |
| Monitoring and Evaluation | Policy indicated monitoring and evaluation mechanisms to track progress on goals for child health | No |  |  |
| Policy nominated a committee or independent body to do evaluation | No |  |  |
| Outcome measures identified for each of the explicit and implicit objectives | No |  |  |
| Data for evaluation will be collected before, during, and after introduction of the new policy | No |  |  |
| Follow-up takes place after a sufficient period to allow the effects of policy change to become evident | No |  |  |
| Other factors that could have produced the change (other than policy) identified | No |  |  |
| Criteria for evaluation adequate or clear | No |  |  |
| Implementation | Multiple stakeholders involved in the design and implementation of the action/s | No |  |  |
| Obligations of the various implementers specified – who has to do what? | No |  |  |

Summary

| **Criteria** | **Quality** |
| --- | --- |
| Policy Background | Needs improvement |
| Goals | Weak |
| Resources | Weak |
| Monitoring and Evaluation | Weak |
| Implementation | Weak |

### **Ethiopia** – Ethiopia’s Climate Resilient Green Economy: National Adaptation Plan

|  | **Criteria** | **Criterion addressed?** | **Explanation** | **Quote** |
| --- | --- | --- | --- | --- |
| Policy Background | Children recognised as disproportionately affected by the impacts of climate change | Yes | Children are referred to as a vulnerable group | “Building social protection and livelihood options of vulnerable people. This adaptation option will give special emphasis to women, children…” |
| Minimum of two context-specific climate-sensitive health risks for children identified | No |  |  |
| Source of background is explicit  Authority (one or more persons, books, scientific articles or sources of information)  Quantitative or qualitative analysis,  Deduction (premises that have been established from authority, observation, intuition or all three) | No |  |  |
| Goals | Goals for child health explicitly stated | No | “Building social protection and livelihood options” of vulnerable people, including children, is a goal – however, no explicit link has been made to health. |  |
| Goals are concrete enough (quantitative where possible and qualitative where not) to be evaluated later | No |  |  |
| Goal is clear in its intent and in the mechanism with which to achieve the desired goals, yet does not attempt to prescribe in detail what the change must be | No |  |  |
| Action/s outlined to improve child health | No |  |  |
| Mechanisms by which children and/or pregnant women will be specifically targeted by the action are explicitly stated | No |  |  |
| Minimum of two actions | No |  |  |
| Actions comprehensively address climate-sensitive health risks identified in policy background | No |  |  |
| Resources | Financial resources addressed  Estimated financial resources for implementation of the action/s given  Allocated financial resources for implementation of the action/s clear  Rewards/sanctions for spending allocated resources on other programs | No | No child health actions stated |  |
| Human resources addressed | No |  |  |
| Organisational capacity addressed | No |  |  |
| Policy indicated strategies to mobilise required resources | No |  |  |
| Monitoring and Evaluation | Policy indicated monitoring and evaluation mechanisms to track progress on goals for child health | No | No goals for child health stated. |  |
| Policy nominated a committee or independent body to do evaluation | No |  |  |
| Outcome measures identified for each of the explicit and implicit objectives | No |  |  |
| Data for evaluation will be collected before, during, and after introduction of the new policy | No |  |  |
| Follow-up takes place after a sufficient period to allow the effects of policy change to become evident | No |  |  |
| Other factors that could have produced the change (other than policy) identified | No |  |  |
| Criteria for evaluation adequate or clear | No |  |  |
| Implementation | Multiple stakeholders involved in the design and implementation of the action/s | No | No child health actions stated. |  |
| Obligations of the various implementers specified – who has to do what? | No | No child health actions stated. |  |

Summary

| **Criteria** | **Quality** |
| --- | --- |
| Policy Background | Needs improvement |
| Goals | Weak |
| Resources | Weak |
| Monitoring and Evaluation | Weak |
| Implementation | Weak |

### **Gabon** – Plan National Climat Gabon

|  | **Criteria** | **Criterion addressed?** | **Explanation** | **Quote** |
| --- | --- | --- | --- | --- |
| Policy Background | Children recognised as disproportionately affected by the impacts of climate change | No |  |  |
| Minimum of two context-specific climate-sensitive health risks for children identified | No |  |  |
| Source of background is explicit  Authority (one or more persons, books, scientific articles or sources of information)  Quantitative or qualitative analysis,  Deduction (premises that have been established from authority, observation, intuition or all three) | No |  |  |
| Goals | Goals for child health explicitly stated | No |  |  |
| Goals are concrete enough (quantitative where possible and qualitative where not) to be evaluated later | No |  |  |
| Goal is clear in its intent and in the mechanism with which to achieve the desired goals, yet does not attempt to prescribe in detail what the change must be | No |  |  |
| Action/s outlined to improve child health | No |  |  |
| Mechanisms by which children and/or pregnant women will be specifically targeted by the action are explicitly stated | No |  |  |
| Minimum of two actions | No |  |  |
| Actions comprehensively address climate-sensitive health risks identified in policy background | No |  |  |
| Resources | Financial resources addressed  Estimated financial resources for implementation of the action/s given  Allocated financial resources for implementation of the action/s clear  Rewards/sanctions for spending allocated resources on other programs | No |  |  |
| Human resources addressed | No |  |  |
| Organisational capacity addressed | No |  |  |
| Policy indicated strategies to mobilise required resources | No |  |  |
| Monitoring and Evaluation | Policy indicated monitoring and evaluation mechanisms to track progress on goals for child health | No |  |  |
| Policy nominated a committee or independent body to do evaluation | No |  |  |
| Outcome measures identified for each of the explicit and implicit objectives | No |  |  |
| Data for evaluation will be collected before, during, and after introduction of the new policy | No |  |  |
| Follow-up takes place after a sufficient period to allow the effects of policy change to become evident | No |  |  |
| Other factors that could have produced the change (other than policy) identified | No |  |  |
| Criteria for evaluation adequate or clear | No |  |  |
| Implementation | Multiple stakeholders involved in the design and implementation of the action/s | No |  |  |
| Obligations of the various implementers specified – who has to do what? | No |  |  |

Summary

| **Criteria** | **Quality** |
| --- | --- |
| Policy Background | Weak |
| Goals | Weak |
| Resources | Weak |
| Monitoring and Evaluation | Weak |
| Implementation | Weak |

### **Gambia** – The Gambia 2050 Climate Vision

|  | **Criteria** | **Criterion addressed?** | **Explanation** | **Quote** |
| --- | --- | --- | --- | --- |
| Policy Background | Children recognised as disproportionately affected by the impacts of climate change | No |  |  |
| Minimum of two context-specific climate-sensitive health risks for children identified | No | Climate risk areas: malnutrition and food insecurity | “The 2014 and 2015 agricultural seasons also suffered shocks that impacted household food security and in turn, affected children’s nutrition as well as access to basic social services.” |
| Source of background is explicit  Authority (one or more persons, books, scientific articles or sources of information)  Quantitative or qualitative analysis,  Deduction (premises that have been established from authority, observation, intuition or all three) | Yes | Government publications |  |
| Goals | Goals for child health explicitly stated | No |  |  |
| Goals are concrete enough (quantitative where possible and qualitative where not) to be evaluated later | No |  |  |
| Goal is clear in its intent and in the mechanism with which to achieve the desired goals, yet does not attempt to prescribe in detail what the change must be | No |  |  |
| Action/s outlined to improve child health | No |  |  |
| Mechanisms by which children and/or pregnant women will be specifically targeted by the action are explicitly stated | No |  |  |
| Minimum of two actions | No |  |  |
| Actions comprehensively address climate-sensitive health risks identified in policy background | No |  |  |
| Resources | Financial resources addressed  Estimated financial resources for implementation of the action/s given  Allocated financial resources for implementation of the action/s clear  Rewards/sanctions for spending allocated resources on other programs | No |  |  |
| Human resources addressed | No |  |  |
| Organisational capacity addressed | No |  |  |
| Policy indicated strategies to mobilise required resources | No |  |  |
| Monitoring and Evaluation | Policy indicated monitoring and evaluation mechanisms to track progress on goals for child health | No |  |  |
| Policy nominated a committee or independent body to do evaluation | No |  |  |
| Outcome measures identified for each of the explicit and implicit objectives | No |  |  |
| Data for evaluation will be collected before, during, and after introduction of the new policy | No |  |  |
| Follow-up takes place after a sufficient period to allow the effects of policy change to become evident | No |  |  |
| Other factors that could have produced the change (other than policy) identified | No |  |  |
| Criteria for evaluation adequate or clear | No |  |  |
| Implementation | Multiple stakeholders involved in the design and implementation of the action/s | No |  |  |
| Obligations of the various implementers specified – who has to do what? | No |  |  |

Summary

| **Criteria** | **Quality** |
| --- | --- |
| Policy Background | Needs improvement |
| Goals | Weak |
| Resources | Weak |
| Monitoring and Evaluation | Weak |
| Implementation | Weak |

### **Ghana** – National Climate Change Adaptation Strategy

|  | **Criteria** | **Criterion addressed?** | **Explanation** | **Quote** |
| --- | --- | --- | --- | --- |
| Policy Background | Children recognised as disproportionately affected by the impacts of climate change | No |  |  |
| Minimum of two context-specific climate-sensitive health risks for children identified | No |  |  |
| Source of background is explicit  Authority (one or more persons, books, scientific articles or sources of information)  Quantitative or qualitative analysis,  Deduction (premises that have been established from authority, observation, intuition or all three) | No |  |  |
| Goals | Goals for child health explicitly stated | No |  |  |
| Goals are concrete enough (quantitative where possible and qualitative where not) to be evaluated later | No |  |  |
| Goal is clear in its intent and in the mechanism with which to achieve the desired goals, yet does not attempt to prescribe in detail what the change must be |  |  |  |
| Action/s outlined to improve child health | No | No goals for child health stated. |  |
| Mechanisms by which children and/or pregnant women will be specifically targeted by the action are explicitly stated | No |  |  |
| Minimum of two actions | No |  |  |
| Actions comprehensively address climate-sensitive health risks identified in policy background | No |  |  |
| Resources | Financial resources addressed  Estimated financial resources for implementation of the action/s given  Allocated financial resources for implementation of the action/s clear  Rewards/sanctions for spending allocated resources on other programs | No |  |  |
| Human resources addressed | No |  |  |
| Organisational capacity addressed | No |  |  |
| Policy indicated strategies to mobilise required resources | No |  |  |
| Monitoring and Evaluation | Policy indicated monitoring and evaluation mechanisms to track progress on goals for child health | No | No goals for child heath stated. |  |
| Policy nominated a committee or independent body to do evaluation | No |  |  |
| Outcome measures identified for each of the explicit and implicit objectives | No |  |  |
| Data for evaluation will be collected before, during, and after introduction of the new policy | No |  |  |
| Follow-up takes place after a sufficient period to allow the effects of policy change to become evident | No |  |  |
| Other factors that could have produced the change (other than policy) identified | No |  |  |
| Criteria for evaluation adequate or clear | No |  |  |
| Implementation | Multiple stakeholders involved in the design and implementation of the action/s | No | No actions for child health stated. |  |
| Obligations of the various implementers specified – who has to do what? | No |  |  |

Summary

| **Criteria** | **Quality** |
| --- | --- |
| Policy Background | Weak |
| Goals | Weak |
| Resources | Weak |
| Monitoring and Evaluation | Weak |
| Implementation | Weak |

### **Guinea** – Plan d’Action National d’Adaptation aux Changements Climatiques (PANA) de la République de Guinee

|  | **Criteria** | **Criterion addressed?** | **Explanation** | **Quote** |
| --- | --- | --- | --- | --- |
| Policy Background | Children recognised as disproportionately affected by the impacts of climate change | No |  |  |
| Minimum of two context-specific climate-sensitive health risks for children identified | No |  |  |
| Source of background is explicit  Authority (one or more persons, books, scientific articles or sources of information)  Quantitative or qualitative analysis,  Deduction (premises that have been established from authority, observation, intuition or all three) | No |  |  |
| Goals | Goals for child health explicitly stated | No |  |  |
| Goals are concrete enough (quantitative where possible and qualitative where not) to be evaluated later | No |  |  |
| Goal is clear in its intent and in the mechanism with which to achieve the desired goals, yet does not attempt to prescribe in detail what the change must be | No |  |  |
| Action/s outlined to improve child health | No |  |  |
| Mechanisms by which children and/or pregnant women will be specifically targeted by the action are explicitly stated | No |  |  |
| Minimum of two actions | No |  |  |
| Actions comprehensively address climate-sensitive health risks identified in policy background | No |  |  |
| Resources | Financial resources addressed  Estimated financial resources for implementation of the action/s given  Allocated financial resources for implementation of the action/s clear  Rewards/sanctions for spending allocated resources on other programs | No |  |  |
| Human resources addressed | No |  |  |
| Organisational capacity addressed | No |  |  |
| Policy indicated strategies to mobilise required resources | No |  |  |
| Monitoring and Evaluation | Policy indicated monitoring and evaluation mechanisms to track progress on goals for child health | No |  |  |
| Policy nominated a committee or independent body to do evaluation | No |  |  |
| Outcome measures identified for each of the explicit and implicit objectives | No |  |  |
| Data for evaluation will be collected before, during, and after introduction of the new policy | No |  |  |
| Follow-up takes place after a sufficient period to allow the effects of policy change to become evident | No |  |  |
| Other factors that could have produced the change (other than policy) identified | No |  |  |
| Criteria for evaluation adequate or clear | No |  |  |
| Implementation | Multiple stakeholders involved in the design and implementation of the action/s | No |  |  |
| Obligations of the various implementers specified – who has to do what? | No |  |  |

Summary

| **Criteria** | **Quality** |
| --- | --- |
| Policy Background | Weak |
| Goals | Weak |
| Resources | Weak |
| Monitoring and Evaluation | Weak |
| Implementation | Weak |

### **Guinea-Bissau** – Updated Nationally Determined Contribution in the Framework of the Paris Climate Agreement

|  | **Criteria** | **Criterion addressed?** | **Explanation** | **Quote** |
| --- | --- | --- | --- | --- |
| Policy Background | Children recognised as disproportionately affected by the impacts of climate change | No |  |  |
| Minimum of two context-specific climate-sensitive health risks for children identified | No |  |  |
| Source of background is explicit  Authority (one or more persons, books, scientific articles or sources of information)  Quantitative or qualitative analysis,  Deduction (premises that have been established from authority, observation, intuition or all three) | No |  |  |
| Goals | Goals for child health explicitly stated | No |  |  |
| Goals are concrete enough (quantitative where possible and qualitative where not) to be evaluated later | No |  |  |
| Goal is clear in its intent and in the mechanism with which to achieve the desired goals, yet does not attempt to prescribe in detail what the change must be | No |  |  |
| Action/s outlined to improve child health | No |  |  |
| Mechanisms by which children and/or pregnant women will be specifically targeted by the action are explicitly stated | No |  |  |
| Minimum of two actions | No |  |  |
| Actions comprehensively address climate-sensitive health risks identified in policy background | No |  |  |
| Resources | Financial resources addressed  Estimated financial resources for implementation of the action/s given  Allocated financial resources for implementation of the action/s clear  Rewards/sanctions for spending allocated resources on other programs | No |  |  |
| Human resources addressed | No |  |  |
| Organisational capacity addressed | No |  |  |
| Policy indicated strategies to mobilise required resources | No |  |  |
| Monitoring and Evaluation | Policy indicated monitoring and evaluation mechanisms to track progress on goals for child health | No |  |  |
| Policy nominated a committee or independent body to do evaluation | No |  |  |
| Outcome measures identified for each of the explicit and implicit objectives | No |  |  |
| Data for evaluation will be collected before, during, and after introduction of the new policy | No |  |  |
| Follow-up takes place after a sufficient period to allow the effects of policy change to become evident | No |  |  |
| Other factors that could have produced the change (other than policy) identified | No |  |  |
| Criteria for evaluation adequate or clear | No |  |  |
| Implementation | Multiple stakeholders involved in the design and implementation of the action/s | No |  |  |
| Obligations of the various implementers specified – who has to do what? | No |  |  |

Summary

| **Criteria** | **Quality** |
| --- | --- |
| Policy Background | Weak |
| Goals | Weak |
| Resources | Weak |
| Monitoring and Evaluation | Weak |
| Implementation | Weak |

### **Kenya** – Kenya National Adaptation Plan 2015-2030

|  | **Criteria** | **Criterion addressed?** | **Explanation** | **Quote** |
| --- | --- | --- | --- | --- |
| Policy Background | Children recognised as disproportionately affected by the impacts of climate change | Yes | Children are described as a vulnerable group. | “Strengthen the adaptive capacity of vulnerable groups (women, orphans and vulnerable children…)” |
| Minimum of two context-specific climate-sensitive health risks for children identified | No | Climate risk areas identified: malnutrition and food insecurity | “Climate-driven reductions in food accessibility are likely to lead to increased malnutrition with often irreversible consequences for young children” |
| Source of background is explicit  Authority (one or more persons, books, scientific articles or sources of information)  Quantitative or qualitative analysis,  Deduction (premises that have been established from authority, observation, intuition or all three) | No |  |  |
| Goals | Goals for child health explicitly stated | No |  |  |
| Goals are concrete enough (quantitative where possible and qualitative where not) to be evaluated later | No |  |  |
| Goal is clear in its intent and in the mechanism with which to achieve the desired goals, yet does not attempt to prescribe in detail what the change must be | No |  |  |
| Action/s outlined to improve child health | Yes | Integrating climate change adaptation issues into school curricula is described. It is unclear whether this includes health adaptation information.  Strengthening adaptive capacity of vulnerable groups is linked to improving food accessibility. Various short-, medium- and long-term sub-actions are outlined, but not explicitly linked to specific goals for child health. | Short-term: “Enhance access to the youth and women enterprise funds; Strengthen and expand social protection and insurance mechanisms against main climate hazards; Establish affordable and accessible credit lines for the urban and rural poor, youth and other vulnerable groups; Create awareness for climate opportunities that women and youth can access”  Medium-term: “Promote livelihood diversification for vulnerable groups in order to reduce rural-urban migration”  Long-term: “Promote and support climate resilient sustainable livelihoods” |
| Mechanisms by which children and/or pregnant women will be specifically targeted by the action are explicitly stated | Yes | Ongoing projects/initiatives are targeted towards youth – e.g enterprise funds, credit lines and climate opportunities specifically for youth. |  |
| Minimum of two actions | Yes |  |  |
| Actions comprehensively address climate-sensitive health risks identified in policy background | Yes | Actions have been linked to improving food accessibility |  |
| Resources | Financial resources addressed  Estimated financial resources for implementation of the action/s given  Allocated financial resources for implementation of the action/s clear  Rewards/sanctions for spending allocated resources on other programs | No | The budget for strengthening adaptive capacity is stated to be US $274,646,553. It is unclear how much of the budget will be used on actions targeting children. |  |
| Human resources addressed | No |  |  |
| Organisational capacity addressed | No |  |  |
| Policy indicated strategies to mobilise required resources | No |  |  |
| Monitoring and Evaluation | Policy indicated monitoring and evaluation mechanisms to track progress on goals for child health | No | Monitoring and evaluation mechanisms are indicated, but not explicitly linked to child health. No child health goals were stated. |  |
| Policy nominated a committee or independent body to do evaluation | No |  |  |
| Outcome measures identified for each of the explicit and implicit objectives | No |  |  |
| Data for evaluation will be collected before, during, and after introduction of the new policy | No |  |  |
| Follow-up takes place after a sufficient period to allow the effects of policy change to become evident | No |  |  |
| Other factors that could have produced the change (other than policy) identified | No |  |  |
| Criteria for evaluation adequate or clear | No |  |  |
| Implementation | Multiple stakeholders involved in the design and implementation of the action/s | Yes |  | “Ministry(ies) responsible for gender, vulnerable groups and youth, MDAs, County Governments, research institutions and academia, civil society and private sector” |
| Obligations of the various implementers specified – who has to do what? | No |  |  |

Summary

| **Criteria** | **Quality** |
| --- | --- |
| Policy Background | Needs improvement |
| Goals | Needs improvement |
| Resources | Weak |
| Monitoring and Evaluation | Weak |
| Implementation | Needs improvement |

### **Lesotho** – Lesotho’s Nationally Determined Contribution

|  | **Criteria** | **Criterion addressed?** | **Explanation** | **Quote** |
| --- | --- | --- | --- | --- |
| Policy Background | Children recognised as disproportionately affected by the impacts of climate change | No |  |  |
| Minimum of two context-specific climate-sensitive health risks for children identified | No |  |  |
| Source of background is explicit  Authority (one or more persons, books, scientific articles or sources of information)  Quantitative or qualitative analysis,  Deduction (premises that have been established from authority, observation, intuition or all three) | No |  |  |
| Goals | Goals for child health explicitly stated | No |  |  |
| Goals are concrete enough (quantitative where possible and qualitative where not) to be evaluated later | No |  |  |
| Goal is clear in its intent and in the mechanism with which to achieve the desired goals, yet does not attempt to prescribe in detail what the change must be | No |  |  |
| Action/s outlined to improve child health | No |  |  |
| Mechanisms by which children and/or pregnant women will be specifically targeted by the action are explicitly stated | No |  |  |
| Minimum of two actions | No |  |  |
| Actions comprehensively address climate-sensitive health risks identified in policy background | No |  |  |
| Resources | Financial resources addressed  Estimated financial resources for implementation of the action/s given  Allocated financial resources for implementation of the action/s clear  Rewards/sanctions for spending allocated resources on other programs | No |  |  |
| Human resources addressed | No |  |  |
| Organisational capacity addressed | No |  |  |
| Policy indicated strategies to mobilise required resources | No |  |  |
| Monitoring and Evaluation | Policy indicated monitoring and evaluation mechanisms to track progress on goals for child health | No |  |  |
| Policy nominated a committee or independent body to do evaluation | No |  |  |
| Outcome measures identified for each of the explicit and implicit objectives | No |  |  |
| Data for evaluation will be collected before, during, and after introduction of the new policy | No |  |  |
| Follow-up takes place after a sufficient period to allow the effects of policy change to become evident | No |  |  |
| Other factors that could have produced the change (other than policy) identified | No |  |  |
| Criteria for evaluation adequate or clear | No |  |  |
| Implementation | Multiple stakeholders involved in the design and implementation of the action/s | No |  |  |
| Obligations of the various implementers specified – who has to do what? | No |  |  |

Summary

| **Criteria** | **Quality** |
| --- | --- |
| Policy Background | Weak |
| Goals | Weak |
| Resources | Weak |
| Monitoring and Evaluation | Weak |
| Implementation | Weak |

### **Liberia** – Liberia National Adaptation Plan 2020-2030

|  | **Criteria** | **Criterion addressed?** | **Explanation** | **Quote** |
| --- | --- | --- | --- | --- |
| Policy Background | Children recognised as disproportionately affected by the impacts of climate change | Yes |  | “…women and children are particularly vulnerable to the impacts of climate change” |
| Minimum of two context-specific climate-sensitive health risks for children identified | No | Climate risk areas identified: heat-related illnesses | “Hot nights are those in which the temperature does not drop below 28˚C. This is an important indicator because hot nights have been shown to have significant health impacts, especially on the elderly, children, and pregnant and lactating women.” |
| Source of background is explicit  Authority (one or more persons, books, scientific articles or sources of information)  Quantitative or qualitative analysis,  Deduction (premises that have been established from authority, observation, intuition or all three) | Yes | Scientific articles |  |
| Goals | Goals for child health explicitly stated | No |  |  |
| Goals are concrete enough (quantitative where possible and qualitative where not) to be evaluated later | No |  |  |
| Goal is clear in its intent and in the mechanism with which to achieve the desired goals, yet does not attempt to prescribe in detail what the change must be | No |  |  |
| Action/s outlined to improve child health | No |  |  |
| Mechanisms by which children and/or pregnant women will be specifically targeted by the action are explicitly stated | No |  |  |
| Minimum of two actions | No |  |  |
| Actions comprehensively address climate-sensitive health risks identified in policy background | No |  |  |
| Resources | Financial resources addressed  Estimated financial resources for implementation of the action/s given  Allocated financial resources for implementation of the action/s clear  Rewards/sanctions for spending allocated resources on other programs | No |  |  |
| Human resources addressed | No |  |  |
| Organisational capacity addressed | No |  |  |
| Policy indicated strategies to mobilise required resources | No |  |  |
| Monitoring and Evaluation | Policy indicated monitoring and evaluation mechanisms to track progress on goals for child health | No |  |  |
| Policy nominated a committee or independent body to do evaluation | No |  |  |
| Outcome measures identified for each of the explicit and implicit objectives | No |  |  |
| Data for evaluation will be collected before, during, and after introduction of the new policy | No |  |  |
| Follow-up takes place after a sufficient period to allow the effects of policy change to become evident | No |  |  |
| Other factors that could have produced the change (other than policy) identified | No |  |  |
| Criteria for evaluation adequate or clear | No |  |  |
| Implementation | Multiple stakeholders involved in the design and implementation of the action/s | No |  |  |
| Obligations of the various implementers specified – who has to do what? | No |  |  |

Summary

| **Criteria** | **Quality** |
| --- | --- |
| Policy Background | Needs improvement |
| Goals | Weak |
| Resources | Weak |
| Monitoring and Evaluation | Weak |
| Implementation | Weak |

### **Madagascar** - Plan stratégique d’adaptation du secteur santé au changement climatique

|  | **Criteria** | **Criterion addressed?** | **Explanation** | **Quote** |
| --- | --- | --- | --- | --- |
| Policy Background | Children recognised as disproportionately affected by the impacts of climate change | Yes | Children are described as a vulnerable group | “…victims classified as vulnerable (…pregnant women, infants, children…) to climatic hazards” |
| Minimum of two context-specific climate-sensitive health risks for children identified | No | Climate risk areas: food- and water-borne diseases | “This lack of water-sanitation-hygiene is partly to blame for water-borne diseases such as diarrhoea, which are the main causes of morbidity and mortality in Madagascar, especially among children.” |
| Source of background is explicit  Authority (one or more persons, books, scientific articles or sources of information)  Quantitative or qualitative analysis,  Deduction (premises that have been established from authority, observation, intuition or all three) | Yes | UNICEF publications |  |
| Goals | Goals for child health explicitly stated | No |  |  |
| Goals are concrete enough (quantitative where possible and qualitative where not) to be evaluated later | No |  |  |
| Goal is clear in its intent and in the mechanism with which to achieve the desired goals, yet does not attempt to prescribe in detail what the change must be | No |  |  |
| Action/s outlined to improve child health | Yes | Developing a health surveillance system with indicators specific for children | “Develop a multi-risk health SAP with indicators on the consideration of gender specificities (men, women, children, the elderly, people with disabilities, etc.), in collaboration and coordination with the DGM and BNGRC” |
| Mechanisms by which children and/or pregnant women will be specifically targeted by the action are explicitly stated | Yes | Indicators specifically for children will be present |  |
| Minimum of two actions | No |  |  |
| Actions comprehensively address climate-sensitive health risks identified in policy background | No |  |  |
| Resources | Financial resources addressed  Estimated financial resources for implementation of the action/s given  Allocated financial resources for implementation of the action/s clear  Rewards/sanctions for spending allocated resources on other programs | Yes | USD 3 million to establish multi-hazard early warning systems |  |
| Human resources addressed | No |  |  |
| Organisational capacity addressed | No |  |  |
| Policy indicated strategies to mobilise required resources | Yes | A finance plan is provided, with the strategic priorities to mobilise internal financial resources, external financial resources, and integrate climate change adaptation into national budgeting processes. | “Strategic priority 1: Mobilise internal financial resources and budget planned activities”  “Strategic priority 2: Mobilise external financial resources”  “Strategic priority 3: Integrate climate change adaptation into national budgeting processes” |
| Monitoring and Evaluation | Policy indicated monitoring and evaluation mechanisms to track progress on goals for child health | Yes |  |  |
| Policy nominated a committee or independent body to do evaluation | Yes |  |  |
| Outcome measures identified for each of the explicit and implicit objectives | Yes |  | “Reduction in the number of victims classified as vulnerable (…pregnant women, infants, children…) to climatic hazards” |
| Data for evaluation will be collected before, during, and after introduction of the new policy | Yes |  | “…baseline data collected at the start of the implementation of the monitoring-evaluation system, and periodic data (at specific points in time) during implementation of the NAP.” |
| Follow-up takes place after a sufficient period to allow the effects of policy change to become evident | No | Time before follow-up is unclear |  |
| Other factors that could have produced the change (other than policy) identified | No |  |  |
| Criteria for evaluation adequate or clear | No | Unclear what classifies as a population as “vulnerable”; not directly measuring health outcomes |  |
| Implementation | Multiple stakeholders involved in the design and implementation of the action/s | Yes | Ministry of Public Health; ONE and Technical Partners; financial institutions |  |
| Obligations of the various implementers specified – who has to do what? | No |  |  |

Summary

| **Criteria** | **Quality** |
| --- | --- |
| Policy Background | Needs improvement |
| Goals | Needs improvement |
| Resources | Needs improvement |
| Monitoring and Evaluation | Needs improvement |
| Implementation | Needs improvement |

### **Malawi** – National Climate Change Management Policy (2016)

|  | **Criteria** | **Criterion addressed?** | **Explanation** | **Quote** |
| --- | --- | --- | --- | --- |
| Policy Background | Children recognised as disproportionately affected by the impacts of climate change | Yes |  | “…vulnerable groups such as… children, especially infants and child-headed families…” |
| Minimum of two context-specific climate-sensitive health risks for children identified | No |  |  |
| Source of background is explicit  Authority (one or more persons, books, scientific articles or sources of information)  Quantitative or qualitative analysis,  Deduction (premises that have been established from authority, observation, intuition or all three) | No |  |  |
| Goals | Goals for child health explicitly stated | No |  |  |
| Goals are concrete enough (quantitative where possible and qualitative where not) to be evaluated later | No |  |  |
| Goal is clear in its intent and in the mechanism with which to achieve the desired goals, yet does not attempt to prescribe in detail what the change must be | No |  |  |
| Action/s outlined to improve child health | No |  |  |
| Mechanisms by which children and/or pregnant women will be specifically targeted by the action are explicitly stated | No |  |  |
| Minimum of two actions | No |  |  |
| Actions comprehensively address climate-sensitive health risks identified in policy background | No |  |  |
| Resources | Financial resources addressed  Estimated financial resources for implementation of the action/s given  Allocated financial resources for implementation of the action/s clear  Rewards/sanctions for spending allocated resources on other programs | No |  |  |
| Human resources addressed | No |  |  |
| Organisational capacity addressed | No |  |  |
| Policy indicated strategies to mobilise required resources | No |  |  |
| Monitoring and Evaluation | Policy indicated monitoring and evaluation mechanisms to track progress on goals for child health | No |  |  |
| Policy nominated a committee or independent body to do evaluation | No |  |  |
| Outcome measures identified for each of the explicit and implicit objectives | No |  |  |
| Data for evaluation will be collected before, during, and after introduction of the new policy | No |  |  |
| Follow-up takes place after a sufficient period to allow the effects of policy change to become evident | No |  |  |
| Other factors that could have produced the change (other than policy) identified | No |  |  |
| Criteria for evaluation adequate or clear | No |  |  |
| Implementation | Multiple stakeholders involved in the design and implementation of the action/s | No |  |  |
| Obligations of the various implementers specified – who has to do what? | No |  |  |

Summary

| **Criteria** | **Quality** |
| --- | --- |
| Policy Background | Needs improvement |
| Goals | Weak |
| Resources | Weak |
| Monitoring and Evaluation | Weak |
| Implementation | Weak |

### **Mali** – Contribution Déterminée au niveau National Révisée

|  | **Criteria** | **Criterion addressed?** | **Explanation** | **Quote** |
| --- | --- | --- | --- | --- |
| Policy Background | Children recognised as disproportionately affected by the impacts of climate change | No |  |  |
| Minimum of two context-specific climate-sensitive health risks for children identified | No |  |  |
| Source of background is explicit  Authority (one or more persons, books, scientific articles or sources of information)  Quantitative or qualitative analysis,  Deduction (premises that have been established from authority, observation, intuition or all three) | No |  |  |
| Goals | Goals for child health explicitly stated | No |  |  |
| Goals are concrete enough (quantitative where possible and qualitative where not) to be evaluated later | No |  |  |
| Goal is clear in its intent and in the mechanism with which to achieve the desired goals, yet does not attempt to prescribe in detail what the change must be | No |  |  |
| Action/s outlined to improve child health | No |  |  |
| Mechanisms by which children and/or pregnant women will be specifically targeted by the action are explicitly stated | No |  |  |
| Minimum of two actions | No |  |  |
| Actions comprehensively address climate-sensitive health risks identified in policy background | No |  |  |
| Resources | Financial resources addressed  Estimated financial resources for implementation of the action/s given  Allocated financial resources for implementation of the action/s clear  Rewards/sanctions for spending allocated resources on other programs | No |  |  |
| Human resources addressed | No |  |  |
| Organisational capacity addressed | No |  |  |
| Policy indicated strategies to mobilise required resources | No |  |  |
| Monitoring and Evaluation | Policy indicated monitoring and evaluation mechanisms to track progress on goals for child health | No |  |  |
| Policy nominated a committee or independent body to do evaluation | No |  |  |
| Outcome measures identified for each of the explicit and implicit objectives | No |  |  |
| Data for evaluation will be collected before, during, and after introduction of the new policy | No |  |  |
| Follow-up takes place after a sufficient period to allow the effects of policy change to become evident | No |  |  |
| Other factors that could have produced the change (other than policy) identified | No |  |  |
| Criteria for evaluation adequate or clear | No |  |  |
| Implementation | Multiple stakeholders involved in the design and implementation of the action/s | No |  |  |
| Obligations of the various implementers specified – who has to do what? | No |  |  |

Summary

| **Criteria** | **Quality** |
| --- | --- |
| Policy Background | Weak |
| Goals | Weak |
| Resources | Weak |
| Monitoring and Evaluation | Weak |
| Implementation | Weak |

### **Mauritania** – Contribution Determinee Nationale Actualisee CDN 2021-2030

|  | **Criteria** | **Criterion addressed?** | **Explanation** | **Quote** |
| --- | --- | --- | --- | --- |
| Policy Background | Children recognised as disproportionately affected by the impacts of climate change | Yes |  | “Mauritania is one of the regions of the world most vulnerable to climate change, the effects of which are already affecting all sectors of its economy, its ecosystems and its people, especially women and children.” |
| Minimum of two context-specific climate-sensitive health risks for children identified | No |  |  |
| Source of background is explicit  Authority (one or more persons, books, scientific articles or sources of information)  Quantitative or qualitative analysis,  Deduction (premises that have been established from authority, observation, intuition or all three) | No |  |  |
| Goals | Goals for child health explicitly stated | No |  |  |
| Goals are concrete enough (quantitative where possible and qualitative where not) to be evaluated later | No |  |  |
| Goal is clear in its intent and in the mechanism with which to achieve the desired goals, yet does not attempt to prescribe in detail what the change must be | No |  |  |
| Action/s outlined to improve child health | Yes |  | “Development and implementation of a health strategy [for] women, young people and the elderly” |
| Mechanisms by which children and/or pregnant women will be specifically targeted by the action are explicitly stated | No | Not enough detail on what the health strategy will include |  |
| Minimum of two actions | No |  |  |
| Actions comprehensively address climate-sensitive health risks identified in policy background | No |  |  |
| Resources | Financial resources addressed  Estimated financial resources for implementation of the action/s given  Allocated financial resources for implementation of the action/s clear  Rewards/sanctions for spending allocated resources on other programs | No |  |  |
| Human resources addressed | No |  |  |
| Organisational capacity addressed | No |  |  |
| Policy indicated strategies to mobilise required resources | No |  |  |
| Monitoring and Evaluation | Policy indicated monitoring and evaluation mechanisms to track progress on goals for child health | No |  |  |
| Policy nominated a committee or independent body to do evaluation | No |  |  |
| Outcome measures identified for each of the explicit and implicit objectives | No |  |  |
| Data for evaluation will be collected before, during, and after introduction of the new policy | No |  |  |
| Follow-up takes place after a sufficient period to allow the effects of policy change to become evident | No |  |  |
| Other factors that could have produced the change (other than policy) identified | No |  |  |
| Criteria for evaluation adequate or clear | No |  |  |
| Implementation | Multiple stakeholders involved in the design and implementation of the action/s | No |  |  |
| Obligations of the various implementers specified – who has to do what? | No |  |  |

Summary

| **Criteria** | **Quality** |
| --- | --- |
| Policy Background | Needs improvement |
| Goals | Needs improvement |
| Resources | Weak |
| Monitoring and Evaluation | Weak |
| Implementation | Weak |

### **Mauritius** – National Climate Change Adaptation Policy Framework for the Republic of Mauritius

|  | **Criteria** | **Criterion addressed?** | **Explanation** | **Quote** |
| --- | --- | --- | --- | --- |
| Policy Background | Children recognised as disproportionately affected by the impacts of climate change | No |  |  |
| Minimum of two context-specific climate-sensitive health risks for children identified | Yes | Climate risk areas: extreme weather events; water- and food-borne diseases; malnutrition and food insecurity; noncommunicable diseases | “Floods & landslides… Affected groups: Small children, pregnant women…”  “Heating and cooling… Affected groups: Small children… pregnant women…”  “Diarrheal infections… Affected groups: …children…”  “Hunger… Affected groups: …children, infants”  “Meningitis… Affected groups: …children” |
| Source of background is explicit  Authority (one or more persons, books, scientific articles or sources of information)  Quantitative or qualitative analysis,  Deduction (premises that have been established from authority, observation, intuition or all three) | Yes | Climate Vulnerability Monitor |  |
| Goals | Goals for child health explicitly stated | No |  |  |
| Goals are concrete enough (quantitative where possible and qualitative where not) to be evaluated later | No |  |  |
| Goal is clear in its intent and in the mechanism with which to achieve the desired goals, yet does not attempt to prescribe in detail what the change must be | No |  |  |
| Action/s outlined to improve child health | No |  |  |
| Mechanisms by which children and/or pregnant women will be specifically targeted by the action are explicitly stated | No |  |  |
| Minimum of two actions | No |  |  |
| Actions comprehensively address climate-sensitive health risks identified in policy background | No |  |  |
| Resources | Financial resources addressed  Estimated financial resources for implementation of the action/s given  Allocated financial resources for implementation of the action/s clear  Rewards/sanctions for spending allocated resources on other programs | No |  |  |
| Human resources addressed | No |  |  |
| Organisational capacity addressed | No |  |  |
| Policy indicated strategies to mobilise required resources | No |  |  |
| Monitoring and Evaluation | Policy indicated monitoring and evaluation mechanisms to track progress on goals for child health | No |  |  |
| Policy nominated a committee or independent body to do evaluation | No |  |  |
| Outcome measures identified for each of the explicit and implicit objectives | No |  |  |
| Data for evaluation will be collected before, during, and after introduction of the new policy | No |  |  |
| Follow-up takes place after a sufficient period to allow the effects of policy change to become evident | No |  |  |
| Other factors that could have produced the change (other than policy) identified | No |  |  |
| Criteria for evaluation adequate or clear | No |  |  |
| Implementation | Multiple stakeholders involved in the design and implementation of the action/s | No |  |  |
| Obligations of the various implementers specified – who has to do what? | No |  |  |

Summary

| **Criteria** | **Quality** |
| --- | --- |
| Policy Background | Needs improvement |
| Goals | Weak |
| Resources | Weak |
| Monitoring and Evaluation | Weak |
| Implementation | Weak |

###

### **Mozambique** – Mozambique’s National Adaptation Plan

|  | **Criteria** | **Criterion addressed?** | **Explanation** | **Quote** |
| --- | --- | --- | --- | --- |
| Policy Background | Children recognised as disproportionately affected by the impacts of climate change | Yes | Children are recognised as a vulnerable group. | “Increasing the adaptive capacity of vulnerable people – integrating gender and children into policies and actions” |
| Minimum of two context-specific climate-sensitive health risks for children identified | Yes | Climate risk areas identified: vector-borne diseases; malnutrition and food insecurity | “Increase in human mortality and morbidity due to the spread of vector-borne diseases associated with climatic variables and malnutrition, with exacerbated effects on the most vulnerable groups” |
| Source of background is explicit  Authority (one or more persons, books, scientific articles or sources of information)  Quantitative or qualitative analysis,  Deduction (premises that have been established from authority, observation, intuition or all three) | Yes | Consultations with various partners |  |
| Goals | Goals for child health explicitly stated | No |  |  |
| Goals are concrete enough (quantitative where possible and qualitative where not) to be evaluated later | No |  |  |
| Goal is clear in its intent and in the mechanism with which to achieve the desired goals, yet does not attempt to prescribe in detail what the change must be | No |  |  |
| Action/s outlined to improve child health | No |  |  |
| Mechanisms by which children and/or pregnant women will be specifically targeted by the action are explicitly stated | No |  |  |
| Minimum of two actions | No |  |  |
| Actions comprehensively address climate-sensitive health risks identified in policy background | No |  |  |
| Resources | Financial resources addressed  Estimated financial resources for implementation of the action/s given  Allocated financial resources for implementation of the action/s clear  Rewards/sanctions for spending allocated resources on other programs | No | No child health goals or actions stated. |  |
| Human resources addressed | No |  |  |
| Organisational capacity addressed | No |  |  |
| Policy indicated strategies to mobilise required resources | No |  |  |
| Monitoring and Evaluation | Policy indicated monitoring and evaluation mechanisms to track progress on goals for child health | No | No child health goals were stated. |  |
| Policy nominated a committee or independent body to do evaluation | No |  |  |
| Outcome measures identified for each of the explicit and implicit objectives | No |  |  |
| Data for evaluation will be collected before, during, and after introduction of the new policy | No |  |  |
| Follow-up takes place after a sufficient period to allow the effects of policy change to become evident | No |  |  |
| Other factors that could have produced the change (other than policy) identified | No |  |  |
| Criteria for evaluation adequate or clear | No |  |  |
| Implementation | Multiple stakeholders involved in the design and implementation of the action/s | No |  |  |
| Obligations of the various implementers specified – who has to do what? | No |  |  |

Summary

| **Criteria** | **Quality** |
| --- | --- |
| Policy Background | Needs improvement |
| Goals | Weak |
| Resources | Weak |
| Monitoring and Evaluation | Weak |
| Implementation | Weak |

### **Namibia** – National Policy on Climate Change for Namibia

|  | **Criteria** | **Criterion addressed?** | **Explanation** | **Quote** |
| --- | --- | --- | --- | --- |
| Policy Background | Children recognised as disproportionately affected by the impacts of climate change | Yes |  |  |
| Minimum of two context-specific climate-sensitive health risks for children identified | Yes | Climate risk areas: malnutrition and food insecurity; infectious diseases | “…the poor and vulnerable, especially women and children will be severely affected [by food insecurity]”  “Children in rural areas are still very prone to curable diseases and thus more vulnerable to illness, child and infant mortality.” |
| Source of background is explicit  Authority (one or more persons, books, scientific articles or sources of information)  Quantitative or qualitative analysis,  Deduction (premises that have been established from authority, observation, intuition or all three) | No |  |  |
| Goals | Goals for child health explicitly stated | No |  |  |
| Goals are concrete enough (quantitative where possible and qualitative where not) to be evaluated later | No |  |  |
| Goal is clear in its intent and in the mechanism with which to achieve the desired goals, yet does not attempt to prescribe in detail what the change must be | No |  |  |
| Action/s outlined to improve child health | No |  |  |
| Mechanisms by which children and/or pregnant women will be specifically targeted by the action are explicitly stated | No |  |  |
| Minimum of two actions | No |  |  |
| Actions comprehensively address climate-sensitive health risks identified in policy background | No |  |  |
| Resources | Financial resources addressed  Estimated financial resources for implementation of the action/s given  Allocated financial resources for implementation of the action/s clear  Rewards/sanctions for spending allocated resources on other programs | No |  |  |
| Human resources addressed | No |  |  |
| Organisational capacity addressed | No |  |  |
| Policy indicated strategies to mobilise required resources | No |  |  |
| Monitoring and Evaluation | Policy indicated monitoring and evaluation mechanisms to track progress on goals for child health | No |  |  |
| Policy nominated a committee or independent body to do evaluation | No |  |  |
| Outcome measures identified for each of the explicit and implicit objectives | No |  |  |
| Data for evaluation will be collected before, during, and after introduction of the new policy | No |  |  |
| Follow-up takes place after a sufficient period to allow the effects of policy change to become evident | No |  |  |
| Other factors that could have produced the change (other than policy) identified | No |  |  |
| Criteria for evaluation adequate or clear | No |  |  |
| Implementation | Multiple stakeholders involved in the design and implementation of the action/s | No |  |  |
| Obligations of the various implementers specified – who has to do what? | No |  |  |

Summary

| **Criteria** | **Quality** |
| --- | --- |
| Policy Background | Needs improvement |
| Goals | Weak |
| Resources | Weak |
| Monitoring and Evaluation | Weak |
| Implementation | Weak |

### **Niger** – Plan National d’Adaptation aux Changements Climatiques

|  | **Criteria** | **Criterion addressed?** | **Explanation** | **Quote** |
| --- | --- | --- | --- | --- |
| Policy Background | Children recognised as disproportionately affected by the impacts of climate change | Yes |  | “Children under 5 are the most vulnerable group.” |
| Minimum of two context-specific climate-sensitive health risks for children identified | Yes | Climate risks: malnutrition and food insecurity; heat-related illnesses; respiratory illnesses | “Famine is one of the causes of malnutrition, resulting in the fragility of vulnerable people, particularly pregnant and breastfeeding women and children.”  “…malnutrition affects children under the age of 5 years. These food crises depend on climatic hazards such as drought, locust invasions and floods.”  “[rural women] remain undeniably attached to natural biomass, with all the… health risks for them and their children.”  “As far as mortality is concerned, it can be seen that in years when maximum temperature exceeded the average for the last 8 years, mortality recorded in health facilities increased… this mortality mainly concerned young children.”  “…years with lower minimum temperatures recorded a higher incidence of acute respiratory infections, especially in children under 5.” |
| Source of background is explicit  Authority (one or more persons, books, scientific articles or sources of information)  Quantitative or qualitative analysis,  Deduction (premises that have been established from authority, observation, intuition or all three) | Yes | MSP, statistical analysis |  |
| Goals | Goals for child health explicitly stated | No |  |  |
| Goals are concrete enough (quantitative where possible and qualitative where not) to be evaluated later | No |  |  |
| Goal is clear in its intent and in the mechanism with which to achieve the desired goals, yet does not attempt to prescribe in detail what the change must be | No |  |  |
| Action/s outlined to improve child health | Yes | Program 16: Improving supply and quality of care and demand for services for climate-sensitive diseases  Program 17: Improving healthcare financing  Program 18: Strengthening health information and research on health and CC themes  Defining indicators for the mobilisation of resources to provide access to emergency medical services for maternal and child health | “Strengthen the capacity of healthcare players to integrate climate issues into the sector; Design an emergency preparedness and response plan… More than 50% of the program’s beneficiaries will be vulnerable people, i.e. women, the elderly and children, given their vulnerability to climate-sensitive diseases.”  “Strengthen the capacities of healthcare players in climate finance; Developing climate-sensitive healthcare projects… More than 50% of the program’s beneficiaries will be vulnerable people, namely women, the elderly and children, given their vulnerability to climate-sensitive diseases.”  “Strengthen the capacity of MSP/P/AS managers in research and innovation methodologies at district level; Organize evaluations/studies/surveys of health system performance; Set up monitoring and information systems that take climate change into account… More than 50% of the program's beneficiaries will be vulnerable people, namely women, the elderly and children, given their vulnerability to climate-sensitive diseases.”  “Define gender-disaggregated indicators for the mobilization of material and financial resources to provide access to emergency medical services for women and young people in the context of maternal and child health” |
| Mechanisms by which children and/or pregnant women will be specifically targeted by the action are explicitly stated | No | The program states that over 50% of beneficiaries will be vulnerable populations, but does not describe mechanisms to achieve this |  |
| Minimum of two actions | Yes |  |  |
| Actions comprehensively address climate-sensitive health risks identified in policy background | Yes |  |  |
| Resources | Financial resources addressed  Estimated financial resources for implementation of the action/s given  Allocated financial resources for implementation of the action/s clear  Rewards/sanctions for spending allocated resources on other programs | No |  |  |
| Human resources addressed | No |  |  |
| Organisational capacity addressed | No |  |  |
| Policy indicated strategies to mobilise required resources | No |  |  |
| Monitoring and Evaluation | Policy indicated monitoring and evaluation mechanisms to track progress on goals for child health | No | No explicit child health goals were provided; outcome measures may not be age-disaggregated (unclear) |  |
| Policy nominated a committee or independent body to do evaluation | Yes | CNEDD |  |
| Outcome measures identified for each of the explicit and implicit objectives | Yes | “Number of beneficiaries” is an outcome indicator, and actions state that “more than 50%” of beneficiaries will be vulnerable people, including children. However, it is unclear whether data will be age-disaggregated |  |
| Data for evaluation will be collected before, during, and after introduction of the new policy | No | Unclear |  |
| Follow-up takes place after a sufficient period to allow the effects of policy change to become evident | No | Unclear |  |
| Other factors that could have produced the change (other than policy) identified | No |  |  |
| Criteria for evaluation adequate or clear | No | Criteria do not directly evaluate health outcomes |  |
| Implementation | Multiple stakeholders involved in the design and implementation of the action/s | Yes | MSP, local authorities, rural populations, producers and private sector, research, other NGO, etc. |  |
| Obligations of the various implementers specified – who has to do what? | No |  |  |

Summary

| **Criteria** | **Quality** |
| --- | --- |
| Policy Background | Strong |
| Goals | Needs improvement |
| Resources | Weak |
| Monitoring and Evaluation | Needs improvement |
| Implementation | Needs improvement |

### **Nigeria** – National Climate Change Policy for Nigeria 2021-2030

|  | **Criteria** | **Criterion addressed?** | **Explanation** | **Quote** |
| --- | --- | --- | --- | --- |
| Policy Background | Children recognised as disproportionately affected by the impacts of climate change | Yes | Under section 3.4 Strategic Objectives and 5. Adaptation | “Mainstreaming gender, children and youth, and other vulnerable groups into all climate change interventions”  “The most vulnerable groups include… children”  “…disaggregated figures are worrying. For instance, the mortality rates of maternal and children under five years are 814 per 100 000 and 104 per 1000 live births, respectively.” |
| Minimum of two context-specific climate-sensitive health risks for children identified | No | Climate risk areas: malnutrition and food insecurity | “Malnutrition is rife particularly among children with a stunting rate of about 43.6%.” |
| Source of background is explicit  Authority (one or more persons, books, scientific articles or sources of information)  Quantitative or qualitative analysis,  Deduction (premises that have been established from authority, observation, intuition or all three) | Yes | WHO statistics |  |
| Goals | Goals for child health explicitly stated | No |  |  |
| Goals are concrete enough (quantitative where possible and qualitative where not) to be evaluated later | No |  |  |
| Goal is clear in its intent and in the mechanism with which to achieve the desired goals, yet does not attempt to prescribe in detail what the change must be | No |  |  |
| Action/s outlined to improve child health | No |  |  |
| Mechanisms by which children and/or pregnant women will be specifically targeted by the action are explicitly stated | No |  |  |
| Minimum of two actions | No |  |  |
| Actions comprehensively address climate-sensitive health risks identified in policy background | No |  |  |
| Resources | Financial resources addressed  Estimated financial resources for implementation of the action/s given  Allocated financial resources for implementation of the action/s clear  Rewards/sanctions for spending allocated resources on other programs | No |  |  |
| Human resources addressed | No |  |  |
| Organisational capacity addressed | No |  |  |
| Policy indicated strategies to mobilise required resources | No |  |  |
| Monitoring and Evaluation | Policy indicated monitoring and evaluation mechanisms to track progress on goals for child health | No | No goals for child health stated. |  |
| Policy nominated a committee or independent body to do evaluation | No |  |  |
| Outcome measures identified for each of the explicit and implicit objectives | No |  |  |
| Data for evaluation will be collected before, during, and after introduction of the new policy | No |  |  |
| Follow-up takes place after a sufficient period to allow the effects of policy change to become evident | No |  |  |
| Other factors that could have produced the change (other than policy) identified | No |  |  |
| Criteria for evaluation adequate or clear | No |  |  |
| Implementation | Multiple stakeholders involved in the design and implementation of the action/s | No | No actions for child health given. |  |
| Obligations of the various implementers specified – who has to do what? | No |  |  |

Summary

| **Criteria** | **Quality** |
| --- | --- |
| Policy Background | Needs improvement |
| Goals | Weak |
| Resources | Weak |
| Monitoring and Evaluation | Weak |
| Implementation | Weak |

### **Rwanda** – National Environment and Climate Change Policy

|  | **Criteria** | **Criterion addressed?** | **Explanation** | **Quote** |
| --- | --- | --- | --- | --- |
| Policy Background | Children recognised as disproportionately affected by the impacts of climate change | No |  |  |
| Minimum of two context-specific climate-sensitive health risks for children identified | No | Climate risk areas: respiratory illnesses | “…acute respiratory infections were registered as… the largest cause of death of children under the age of five in Rwanda” |
| Source of background is explicit  Authority (one or more persons, books, scientific articles or sources of information)  Quantitative or qualitative analysis,  Deduction (premises that have been established from authority, observation, intuition or all three) | Yes | Rwanda Environment Management Authority |  |
| Goals | Goals for child health explicitly stated | No |  |  |
| Goals are concrete enough (quantitative where possible and qualitative where not) to be evaluated later | No |  |  |
| Goal is clear in its intent and in the mechanism with which to achieve the desired goals, yet does not attempt to prescribe in detail what the change must be | No |  |  |
| Action/s outlined to improve child health | No |  |  |
| Mechanisms by which children and/or pregnant women will be specifically targeted by the action are explicitly stated | No |  |  |
| Minimum of two actions |  |  |  |
| Actions comprehensively address climate-sensitive health risks identified in policy background | No |  |  |
| Resources | Financial resources addressed  Estimated financial resources for implementation of the action/s given  Allocated financial resources for implementation of the action/s clear  Rewards/sanctions for spending allocated resources on other programs | No | No actions for child health were stated |  |
| Human resources addressed | No |  |  |
| Organisational capacity addressed | No |  |  |
| Policy indicated strategies to mobilise required resources | No |  |  |
| Monitoring and Evaluation | Policy indicated monitoring and evaluation mechanisms to track progress on goals for child health | No | No goals for child health were stated |  |
| Policy nominated a committee or independent body to do evaluation | No |  |  |
| Outcome measures identified for each of the explicit and implicit objectives | No |  |  |
| Data for evaluation will be collected before, during, and after introduction of the new policy | No |  |  |
| Follow-up takes place after a sufficient period to allow the effects of policy change to become evident | No |  |  |
| Other factors that could have produced the change (other than policy) identified | No |  |  |
| Criteria for evaluation adequate or clear | No |  |  |
| Implementation | Multiple stakeholders involved in the design and implementation of the action/s | No | No actions for child health were stated. |  |
| Obligations of the various implementers specified – who has to do what? | No |  |  |

Summary

| **Criteria** | **Quality** |
| --- | --- |
| Policy Background | Needs improvement |
| Goals | Weak |
| Resources | Weak |
| Monitoring and Evaluation | Weak |
| Implementation | Weak |

### **São Tomé and Principe** – Nationally Determined Contributions (NDC-STP) Updated

|  | **Criteria** | **Criterion addressed?** | **Explanation** | **Quote** |
| --- | --- | --- | --- | --- |
| Policy Background | Children recognised as disproportionately affected by the impacts of climate change | No | No mention of children |  |
| Minimum of two context-specific climate-sensitive health risks for children identified | No |  |  |
| Source of background is explicit  Authority (one or more persons, books, scientific articles or sources of information)  Quantitative or qualitative analysis,  Deduction (premises that have been established from authority, observation, intuition or all three) | No |  |  |
| Goals | Goals for child health explicitly stated | No |  |  |
| Goals are concrete enough (quantitative where possible and qualitative where not) to be evaluated later | No |  |  |
| Goal is clear in its intent and in the mechanism with which to achieve the desired goals, yet does not attempt to prescribe in detail what the change must be | No |  |  |
| Action/s outlined to improve child health | No |  |  |
| Mechanisms by which children and/or pregnant women will be specifically targeted by the action are explicitly stated | No |  |  |
| Minimum of two actions | No |  |  |
| Actions comprehensively address climate-sensitive health risks identified in policy background | No |  |  |
| Resources | Financial resources addressed  Estimated financial resources for implementation of the action/s given  Allocated financial resources for implementation of the action/s clear  Rewards/sanctions for spending allocated resources on other programs | No |  |  |
| Human resources addressed | No |  |  |
| Organisational capacity addressed | No |  |  |
| Policy indicated strategies to mobilise required resources | No |  |  |
| Monitoring and Evaluation | Policy indicated monitoring and evaluation mechanisms to track progress on goals for child health | No |  |  |
| Policy nominated a committee or independent body to do evaluation | No |  |  |
| Outcome measures identified for each of the explicit and implicit objectives | No |  |  |
| Data for evaluation will be collected before, during, and after introduction of the new policy | No |  |  |
| Follow-up takes place after a sufficient period to allow the effects of policy change to become evident | No |  |  |
| Other factors that could have produced the change (other than policy) identified | No |  |  |
| Criteria for evaluation adequate or clear | No |  |  |
| Implementation | Multiple stakeholders involved in the design and implementation of the action/s | No |  |  |
| Obligations of the various implementers specified – who has to do what? | No |  |  |

Summary

| **Criteria** | **Quality** |
| --- | --- |
| Policy Background | Weak |
| Goals | Weak |
| Resources | Weak |
| Monitoring and Evaluation | Weak |
| Implementation | Weak |

### **Senegal** – Contribution Déterminée au Niveau National du Senegal

|  | **Criteria** | **Criterion addressed?** | **Explanation** | **Quote** |
| --- | --- | --- | --- | --- |
| Policy Background | Children recognised as disproportionately affected by the impacts of climate change | No |  |  |
| Minimum of two context-specific climate-sensitive health risks for children identified | No |  |  |
| Source of background is explicit  Authority (one or more persons, books, scientific articles or sources of information)  Quantitative or qualitative analysis,  Deduction (premises that have been established from authority, observation, intuition or all three) | No |  |  |
| Goals | Goals for child health explicitly stated | No |  |  |
| Goals are concrete enough (quantitative where possible and qualitative where not) to be evaluated later | No |  |  |
| Goal is clear in its intent and in the mechanism with which to achieve the desired goals, yet does not attempt to prescribe in detail what the change must be | No |  |  |
| Action/s outlined to improve child health | No |  |  |
| Mechanisms by which children and/or pregnant women will be specifically targeted by the action are explicitly stated | No |  |  |
| Minimum of two actions | No |  |  |
| Actions comprehensively address climate-sensitive health risks identified in policy background | No |  |  |
| Resources | Financial resources addressed  Estimated financial resources for implementation of the action/s given  Allocated financial resources for implementation of the action/s clear  Rewards/sanctions for spending allocated resources on other programs | No |  |  |
| Human resources addressed | No |  |  |
| Organisational capacity addressed | No |  |  |
| Policy indicated strategies to mobilise required resources | No |  |  |
| Monitoring and Evaluation | Policy indicated monitoring and evaluation mechanisms to track progress on goals for child health | No |  |  |
| Policy nominated a committee or independent body to do evaluation | No |  |  |
| Outcome measures identified for each of the explicit and implicit objectives | No |  |  |
| Data for evaluation will be collected before, during, and after introduction of the new policy | No |  |  |
| Follow-up takes place after a sufficient period to allow the effects of policy change to become evident | No |  |  |
| Other factors that could have produced the change (other than policy) identified | No |  |  |
| Criteria for evaluation adequate or clear | No |  |  |
| Implementation | Multiple stakeholders involved in the design and implementation of the action/s | No |  |  |
| Obligations of the various implementers specified – who has to do what? | No |  |  |

Summary

| **Criteria** | **Quality** |
| --- | --- |
| Policy Background | Weak |
| Goals | Weak |
| Resources | Weak |
| Monitoring and Evaluation | Weak |
| Implementation | Weak |

### **Seychelles** – Seychelles National Climate Change Strategy

|  | **Criteria** | **Criterion addressed?** | **Explanation** | **Quote** |
| --- | --- | --- | --- | --- |
| Policy Background | Children recognised as disproportionately affected by the impacts of climate change | No |  |  |
| Minimum of two context-specific climate-sensitive health risks for children identified | No |  |  |
| Source of background is explicit  Authority (one or more persons, books, scientific articles or sources of information)  Quantitative or qualitative analysis,  Deduction (premises that have been established from authority, observation, intuition or all three) | No |  |  |
| Goals | Goals for child health explicitly stated | No |  |  |
| Goals are concrete enough (quantitative where possible and qualitative where not) to be evaluated later | No |  |  |
| Goal is clear in its intent and in the mechanism with which to achieve the desired goals, yet does not attempt to prescribe in detail what the change must be | No |  |  |
| Action/s outlined to improve child health | No |  |  |
| Mechanisms by which children and/or pregnant women will be specifically targeted by the action are explicitly stated | No |  |  |
| Minimum of two actions | No |  |  |
| Actions comprehensively address climate-sensitive health risks identified in policy background | No |  |  |
| Resources | Financial resources addressed  Estimated financial resources for implementation of the action/s given  Allocated financial resources for implementation of the action/s clear  Rewards/sanctions for spending allocated resources on other programs | No |  |  |
| Human resources addressed | No |  |  |
| Organisational capacity addressed | No |  |  |
| Policy indicated strategies to mobilise required resources | No |  |  |
| Monitoring and Evaluation | Policy indicated monitoring and evaluation mechanisms to track progress on goals for child health | No |  |  |
| Policy nominated a committee or independent body to do evaluation | No |  |  |
| Outcome measures identified for each of the explicit and implicit objectives | No |  |  |
| Data for evaluation will be collected before, during, and after introduction of the new policy | No |  |  |
| Follow-up takes place after a sufficient period to allow the effects of policy change to become evident | No |  |  |
| Other factors that could have produced the change (other than policy) identified | No |  |  |
| Criteria for evaluation adequate or clear | No |  |  |
| Implementation | Multiple stakeholders involved in the design and implementation of the action/s | No |  |  |
| Obligations of the various implementers specified – who has to do what? | No |  |  |

Summary

| **Criteria** | **Quality** |
| --- | --- |
| Policy Background | Weak |
| Goals | Weak |
| Resources | Weak |
| Monitoring and Evaluation | Weak |
| Implementation | Weak |

### **Sierra Leone** – Government of Sierra Leone National Adaptation Plan

|  | **Criteria** | **Criterion addressed?** | **Explanation** | **Quote** |
| --- | --- | --- | --- | --- |
| Policy Background | Children recognised as disproportionately affected by the impacts of climate change | Yes |  |  |
| Minimum of two context-specific climate-sensitive health risks for children identified | Yes | Climate risk areas identified: malnutrition and food insecurity; water- and food-borne diseases; vector-borne diseases; heat-related illnesses | “Sierra Leone has one of the highest malnutrition and child mortality rates in the world, making the country’s population extremely vulnerable to climate shocks”  “Incidents of high temperature morbidity and mortality are projected to increase. Rising temperatures are also associated with increased episodes of diarrhoeal diseases, seafood poisoning and increases in dangerous pollutants.”  “Malaria is the most common cause of illness and death in the country, with malaria related illnesses contributing to 38 percent of child… mortality rates.”  “The most vulnerable groups include children aged under 5 years and pregnant women.” |
| Source of background is explicit  Authority (one or more persons, books, scientific articles or sources of information)  Quantitative or qualitative analysis,  Deduction (premises that have been established from authority, observation, intuition or all three) | Yes | Scientific articles, government publications |  |
| Goals | Goals for child health explicitly stated | No | Goals to increase investment in children and adolescents, and to increase youth employment and empowerment, are not explicitly linked to health outcomes. |  |
| Goals are concrete enough (quantitative where possible and qualitative where not) to be evaluated later | No |  |  |
| Goal is clear in its intent and in the mechanism with which to achieve the desired goals, yet does not attempt to prescribe in detail what the change must be | No |  |  |
| Action/s outlined to improve child health | No |  |  |
| Mechanisms by which children and/or pregnant women will be specifically targeted by the action are explicitly stated | No |  |  |
| Minimum of two actions | No |  |  |
| Actions comprehensively address climate-sensitive health risks identified in policy background | No |  |  |
| Resources | Financial resources addressed  Estimated financial resources for implementation of the action/s given  Allocated financial resources for implementation of the action/s clear  Rewards/sanctions for spending allocated resources on other programs | No |  |  |
| Human resources addressed | No |  |  |
| Organisational capacity addressed | No |  |  |
| Policy indicated strategies to mobilise required resources | No |  |  |
| Monitoring and Evaluation | Policy indicated monitoring and evaluation mechanisms to track progress on goals for child health | No |  |  |
| Policy nominated a committee or independent body to do evaluation | No |  |  |
| Outcome measures identified for each of the explicit and implicit objectives | No |  |  |
| Data for evaluation will be collected before, during, and after introduction of the new policy | No |  |  |
| Follow-up takes place after a sufficient period to allow the effects of policy change to become evident | No |  |  |
| Other factors that could have produced the change (other than policy) identified | No |  |  |
| Criteria for evaluation adequate or clear | No |  |  |
| Implementation | Multiple stakeholders involved in the design and implementation of the action/s | No |  |  |
| Obligations of the various implementers specified – who has to do what? | No |  |  |

Summary

| **Criteria** | **Quality** |
| --- | --- |
| Policy Background | Needs improvement |
| Goals | Weak |
| Resources | Weak |
| Monitoring and Evaluation | Weak |
| Implementation | Weak |

### **South Africa** – National Climate Change Adaptation Strategy

|  | **Criteria** | **Criterion addressed?** | **Explanation** | **Quote** |
| --- | --- | --- | --- | --- |
| Policy Background | Children recognised as disproportionately affected by the impacts of climate change | Yes | A guiding principle for the policy is consideration of vulnerable groups, including children.  No descriptions of specific health impacts. | “…vulnerable groups, including… children… will be the affected the most by climate change.”  “The development and implementation of the NCCAS will promote the participation of vulnerable groups and build resilience and adaptive capacity of the most vulnerable people such as… children, especially infants and child-headed families” |
| Minimum of two context-specific climate-sensitive health risks for children identified | No |  |  |
| Source of background is explicit  Authority (one or more persons, books, scientific articles or sources of information)  Quantitative or qualitative analysis,  Deduction (premises that have been established from authority, observation, intuition or all three) | No |  |  |
| Goals | Goals for child health explicitly stated | No |  |  |
| Goals are concrete enough (quantitative where possible and qualitative where not) to be evaluated later | No |  |  |
| Goal is clear in its intent and in the mechanism with which to achieve the desired goals, yet does not attempt to prescribe in detail what the change must be | No |  |  |
| Action/s outlined to improve child health | No | An action given is to “incorporate climate change adaptation into relevant primary, secondary and tertiary curricula”. It is unclear whether this includes health information. |  |
| Mechanisms by which children and/or pregnant women will be specifically targeted by the action are explicitly stated | No |  |  |
| Minimum of two actions | No |  |  |
| Actions comprehensively address climate-sensitive health risks identified in policy background | No |  |  |
| Resources | Financial resources addressed  Estimated financial resources for implementation of the action/s given  Allocated financial resources for implementation of the action/s clear  Rewards/sanctions for spending allocated resources on other programs | No |  |  |
| Human resources addressed | No |  |  |
| Organisational capacity addressed | No |  |  |
| Policy indicated strategies to mobilise required resources | No |  |  |
| Monitoring and Evaluation | Policy indicated monitoring and evaluation mechanisms to track progress on goals for child health | No |  |  |
| Policy nominated a committee or independent body to do evaluation | No |  |  |
| Outcome measures identified for each of the explicit and implicit objectives | No |  |  |
| Data for evaluation will be collected before, during, and after introduction of the new policy | No |  |  |
| Follow-up takes place after a sufficient period to allow the effects of policy change to become evident | No |  |  |
| Other factors that could have produced the change (other than policy) identified | No |  |  |
| Criteria for evaluation adequate or clear | No |  |  |
| Implementation | Multiple stakeholders involved in the design and implementation of the action/s | No |  |  |
| Obligations of the various implementers specified – who has to do what? | No |  |  |

Summary

| **Criteria** | **Quality** |
| --- | --- |
| Policy Background | Needs improvement |
| Goals | Weak |
| Resources | Weak |
| Monitoring and Evaluation | Weak |
| Implementation | Weak |

### **South Sudan** – First National Adaptation Plan for Climate Change

|  | **Criteria** | **Criterion addressed?** | **Explanation** | **Quote** |
| --- | --- | --- | --- | --- |
| Policy Background | Children recognised as disproportionately affected by the impacts of climate change | Yes |  | “Food insecurity and health issues increase sensitivity to climate change impacts [of infants and children]” |
| Minimum of two context-specific climate-sensitive health risks for children identified | Yes | Climate risk areas identified: malnutrition and food insecurity; heat-related illnesses | “Infant mortality is 105 per 1000; despite progress this rate is still the 9th highest in the world, while the maternal mortality rate is the highest in the world, with 1 in 7 women dying during childbirth or pregnancy (BRACED, 2017; MoFP, 2018). Just over a quarter of children under the age of 5 are moderately or severely (12 percent) underweight.”  “Increasing temperatures and heat waves also affect the amount of time that people can safely spend outdoors and increases dehydration and heat exhaustion. These impacts fall disproportionately on women, children and the elderly.” |
| Source of background is explicit  Authority (one or more persons, books, scientific articles or sources of information)  Quantitative or qualitative analysis,  Deduction (premises that have been established from authority, observation, intuition or all three) | Yes | BRACED, Ministry of Finance and Planning |  |
| Goals | Goals for child health explicitly stated | Yes | Improving coverage and access of inclusive and quality social services, with consideration of children. Health is mentioned as a part of the social sector. | “Adequate coverage and inclusive access to quality social services is provided… [which will] help to address climate vulnerabilities of at-risk groups, including women, children and internally displaced people” |
| Goals are concrete enough (quantitative where possible and qualitative where not) to be evaluated later | Yes | Quantitative measures have been outlined (see Monitoring and Evaluation) |  |
| Goal is clear in its intent and in the mechanism with which to achieve the desired goals, yet does not attempt to prescribe in detail what the change must be | No |  |  |
| Action/s outlined to improve child health | Yes | To help in improving access to social services, a vulnerability assessment will be performed and measures will be designed to specifically target women and children | “Conduct analyses to determine specific vulnerabilities of women, IDPs, children and other groups and design measures to address these” |
| Mechanisms by which children and/or pregnant women will be specifically targeted by the action are explicitly stated | No | The exact measures to target women and children have not been specified |  |
| Minimum of two actions | No |  |  |
| Actions comprehensively address climate-sensitive health risks identified in policy background | No |  |  |
| Resources | Financial resources addressed  Estimated financial resources for implementation of the action/s given  Allocated financial resources for implementation of the action/s clear  Rewards/sanctions for spending allocated resources on other programs | No |  |  |
| Human resources addressed | No |  |  |
| Organisational capacity addressed | No |  |  |
| Policy indicated strategies to mobilise required resources | No |  |  |
| Monitoring and Evaluation | Policy indicated monitoring and evaluation mechanisms to track progress on goals for child health | No |  |  |
| Policy nominated a committee or independent body to do evaluation | No |  |  |
| Outcome measures identified for each of the explicit and implicit objectives | Yes |  | “Access to inclusive and quality services improves from 44% to 60% of the population; percentage of human resources capacitated improves from 13.5% to 27%” |
| Data for evaluation will be collected before, during, and after introduction of the new policy | No |  |  |
| Follow-up takes place after a sufficient period to allow the effects of policy change to become evident | No |  |  |
| Other factors that could have produced the change (other than policy) identified | No |  |  |
| Criteria for evaluation adequate or clear | No |  |  |
| Implementation | Multiple stakeholders involved in the design and implementation of the action/s | No | Stakeholders have not been stated |  |
| Obligations of the various implementers specified – who has to do what? | No |  |  |

Summary

| **Criteria** | **Quality** |
| --- | --- |
| Policy Background | Needs improvement |
| Goals | Needs improvement |
| Resources | Weak |
| Monitoring and Evaluation | Weak |
| Implementation | Weak |

### **Togo** – Plan National d’Adaption aux Changements Climatiques du Togo

|  | **Criteria** | **Criterion addressed?** | **Explanation** | **Quote** |
| --- | --- | --- | --- | --- |
| Policy Background | Children recognised as disproportionately affected by the impacts of climate change | Yes |  |  |
| Minimum of two context-specific climate-sensitive health risks for children identified | Yes | Climate risks: vector-borne diseases; extreme weather events; heat-related illness; noncommunicable diseases; respiratory illnesses | “In the health sub-sector, vector-borne diseases such as malaria, which affect children aged 0 to 5 and pregnant women the most, will be amplified…”  “Drought and extreme heat will increase the prevalence of diseases such as meningitis, cardiovascular and cerebrovascular diseases, and respiratory illnesses (bronchitis, pneumonia, asthma, etc.), which will affect people of all ages, especially the elderly and children.” |
| Source of background is explicit  Authority (one or more persons, books, scientific articles or sources of information)  Quantitative or qualitative analysis,  Deduction (premises that have been established from authority, observation, intuition or all three) | Yes | Vulnerability analysis |  |
| Goals | Goals for child health explicitly stated | No |  |  |
| Goals are concrete enough (quantitative where possible and qualitative where not) to be evaluated later | No |  |  |
| Goal is clear in its intent and in the mechanism with which to achieve the desired goals, yet does not attempt to prescribe in detail what the change must be | No |  |  |
| Action/s outlined to improve child health | No |  |  |
| Mechanisms by which children and/or pregnant women will be specifically targeted by the action are explicitly stated | No |  |  |
| Minimum of two actions | No |  |  |
| Actions comprehensively address climate-sensitive health risks identified in policy background | No |  |  |
| Resources | Financial resources addressed  Estimated financial resources for implementation of the action/s given  Allocated financial resources for implementation of the action/s clear  Rewards/sanctions for spending allocated resources on other programs | No |  |  |
| Human resources addressed | No |  |  |
| Organisational capacity addressed | No |  |  |
| Policy indicated strategies to mobilise required resources | No |  |  |
| Monitoring and Evaluation | Policy indicated monitoring and evaluation mechanisms to track progress on goals for child health | No |  |  |
| Policy nominated a committee or independent body to do evaluation | No |  |  |
| Outcome measures identified for each of the explicit and implicit objectives | No |  |  |
| Data for evaluation will be collected before, during, and after introduction of the new policy | No |  |  |
| Follow-up takes place after a sufficient period to allow the effects of policy change to become evident | No |  |  |
| Other factors that could have produced the change (other than policy) identified | No |  |  |
| Criteria for evaluation adequate or clear | No |  |  |
| Implementation | Multiple stakeholders involved in the design and implementation of the action/s | No |  |  |
| Obligations of the various implementers specified – who has to do what? | No |  |  |

Summary

| **Criteria** | **Quality** |
| --- | --- |
| Policy Background | Strong |
| Goals | Weak |
| Resources | Weak |
| Monitoring and Evaluation | Weak |
| Implementation | Weak |

### **Uganda** – National Climate Change Policy

|  | **Criteria** | **Criterion addressed?** | **Explanation** | **Quote** |
| --- | --- | --- | --- | --- |
| Policy Background | Children recognised as disproportionately affected by the impacts of climate change | Yes |  | “Vulnerable populations (mainly the poor and most marginalised, including children, women, older persons and people with disabilities in developing countries) are particularly poorly equipped to cope with the adverse impacts of climate change.” |
| Minimum of two context-specific climate-sensitive health risks for children identified | Yes | Climate risks: food- and water-borne diseases; malnutrition and food insecurity | “Water stress will lead to increasingly poor livelihoods and rising mortality rates due to increasing water-borne diseases, malnutrition and burden on women and children as burden-holders for household needs.”  “Children and infants are still prone to curable diseases and thus are more vulnerable to illness and death.” |
| Source of background is explicit  Authority (one or more persons, books, scientific articles or sources of information)  Quantitative or qualitative analysis,  Deduction (premises that have been established from authority, observation, intuition or all three) | No |  |  |
| Goals | Goals for child health explicitly stated | Yes |  | “Concerted action to improve women’s status, as well as maternal and child health, while protecting the right of women to make their own decisions about childbearing.” |
| Goals are concrete enough (quantitative where possible and qualitative where not) to be evaluated later | No |  |  |
| Goal is clear in its intent and in the mechanism with which to achieve the desired goals, yet does not attempt to prescribe in detail what the change must be | No |  |  |
| Action/s outlined to improve child health | No |  |  |
| Mechanisms by which children and/or pregnant women will be specifically targeted by the action are explicitly stated | No |  |  |
| Minimum of two actions | No |  |  |
| Actions comprehensively address climate-sensitive health risks identified in policy background | No |  |  |
| Resources | Financial resources addressed  Estimated financial resources for implementation of the action/s given  Allocated financial resources for implementation of the action/s clear  Rewards/sanctions for spending allocated resources on other programs | No |  |  |
| Human resources addressed | No |  |  |
| Organisational capacity addressed | No |  |  |
| Policy indicated strategies to mobilise required resources | No |  |  |
| Monitoring and Evaluation | Policy indicated monitoring and evaluation mechanisms to track progress on goals for child health | No |  |  |
| Policy nominated a committee or independent body to do evaluation | No |  |  |
| Outcome measures identified for each of the explicit and implicit objectives | No |  |  |
| Data for evaluation will be collected before, during, and after introduction of the new policy | No |  |  |
| Follow-up takes place after a sufficient period to allow the effects of policy change to become evident | No |  |  |
| Other factors that could have produced the change (other than policy) identified | No |  |  |
| Criteria for evaluation adequate or clear | No |  |  |
| Implementation | Multiple stakeholders involved in the design and implementation of the action/s | No |  |  |
| Obligations of the various implementers specified – who has to do what? | No |  |  |

Summary

| **Criteria** | **Quality** |
| --- | --- |
| Policy Background | Needs improvement |
| Goals | Needs improvement |
| Resources | Weak |
| Monitoring and Evaluation | Weak |
| Implementation | Weak |

### **United Republic of Tanzania** – National Climate Change Response Strategy 2021-2026

|  | **Criteria** | **Criterion addressed?** | **Explanation** | **Quote** |
| --- | --- | --- | --- | --- |
| Policy Background | Children recognised as disproportionately affected by the impacts of climate change | Yes |  |  |
| Minimum of two context-specific climate-sensitive health risks for children identified | No | Climate risk areas: vector-borne diseases | “Malaria is the most important public health concern in Tanzania, especially in children under five years of age and among pregnant women.” |
| Source of background is explicit  Authority (one or more persons, books, scientific articles or sources of information)  Quantitative or qualitative analysis,  Deduction (premises that have been established from authority, observation, intuition or all three) | Yes | Government publications |  |
| Goals | Goals for child health explicitly stated | No |  |  |
| Goals are concrete enough (quantitative where possible and qualitative where not) to be evaluated later | No |  |  |
| Goal is clear in its intent and in the mechanism with which to achieve the desired goals, yet does not attempt to prescribe in detail what the change must be | No |  |  |
| Action/s outlined to improve child health | No |  |  |
| Mechanisms by which children and/or pregnant women will be specifically targeted by the action are explicitly stated | No |  |  |
| Minimum of two actions | No |  |  |
| Actions comprehensively address climate-sensitive health risks identified in policy background | No |  |  |
| Resources | Financial resources addressed  Estimated financial resources for implementation of the action/s given  Allocated financial resources for implementation of the action/s clear  Rewards/sanctions for spending allocated resources on other programs | No |  |  |
| Human resources addressed | No |  |  |
| Organisational capacity addressed | No |  |  |
| Policy indicated strategies to mobilise required resources | No |  |  |
| Monitoring and Evaluation | Policy indicated monitoring and evaluation mechanisms to track progress on goals for child health | No |  |  |
| Policy nominated a committee or independent body to do evaluation | No |  |  |
| Outcome measures identified for each of the explicit and implicit objectives | No |  |  |
| Data for evaluation will be collected before, during, and after introduction of the new policy | No |  |  |
| Follow-up takes place after a sufficient period to allow the effects of policy change to become evident | No |  |  |
| Other factors that could have produced the change (other than policy) identified | No |  |  |
| Criteria for evaluation adequate or clear | No |  |  |
| Implementation | Multiple stakeholders involved in the design and implementation of the action/s | No |  |  |
| Obligations of the various implementers specified – who has to do what? | No |  |  |

Summary

| **Criteria** | **Quality** |
| --- | --- |
| Policy Background | Needs improvement |
| Goals | Weak |
| Resources | Weak |
| Monitoring and Evaluation | Weak |
| Implementation | Weak |

### **Zambia** – National Adaptation Plan for Zambia

|  | **Criteria** | **Criterion addressed?** | **Explanation** | **Quote** |
| --- | --- | --- | --- | --- |
| Policy Background | Children recognised as disproportionately affected by the impacts of climate change | Yes |  |  |
| Minimum of two context-specific climate-sensitive health risks for children identified | Yes | “Poor nutrition levels due to reduced food productivity and food production” is an identified climate risk. The adaptive capacity of small-scale farmers through reliance on a maize diet was linked to stunting.  Climate risk areas identified: malnutrition and food insecurity; extreme weather events | “Concentration is on a maize diet which… encourages stunting in children”  “Increased personal risk for women and adolescent girls in search for clean water.” |
| Source of background is explicit  Authority (one or more persons, books, scientific articles or sources of information)  Quantitative or qualitative analysis,  Deduction (premises that have been established from authority, observation, intuition or all three) | Yes | Vulnerability assessment on drought-related impacts |  |
| Goals | Goals for child health explicitly stated | No |  |  |
| Goals are concrete enough (quantitative where possible and qualitative where not) to be evaluated later | No |  |  |
| Goal is clear in its intent and in the mechanism with which to achieve the desired goals, yet does not attempt to prescribe in detail what the change must be | No |  |  |
| Action/s outlined to improve child health | Yes | In response to the concentration on maize diets, actions to diversify diets to improve nutrition are provided. These have not been linked explicitly to children.  Actions to reduce personal risk for women and girls in search for clean water have also been identified. | “Promote health education on how to prepare and use available foods; Promote cultivation of fortified food crops (orange-fleshed sweet potatoes and maize); Promoting the preparation and preservation of foods; Enhance food production and post-harvest and preservation techniques.”  “Awareness and sensitization in climate change issues and their implications; Improving access to clean water and sanitary facilities; Developing local rainwater harvesting measures” |
| Mechanisms by which children and/or pregnant women will be specifically targeted by the action are explicitly stated | No | The above actions to diversify diets are targeted to small scale farmers. They have not been explicitly linked to child health.  Mechanisms to target adolescent girls specifically have not been stated. |  |
| Minimum of two actions | Yes |  |  |
| Actions comprehensively address climate-sensitive health risks identified in policy background | Yes |  |  |
| Resources | Financial resources addressed  Estimated financial resources for implementation of the action/s given  Allocated financial resources for implementation of the action/s clear  Rewards/sanctions for spending allocated resources on other programs | No |  |  |
| Human resources addressed | No |  |  |
| Organisational capacity addressed | No |  |  |
| Policy indicated strategies to mobilise required resources | No |  |  |
| Monitoring and Evaluation | Policy indicated monitoring and evaluation mechanisms to track progress on goals for child health | No |  |  |
| Policy nominated a committee or independent body to do evaluation | No |  |  |
| Outcome measures identified for each of the explicit and implicit objectives | No |  |  |
| Data for evaluation will be collected before, during, and after introduction of the new policy | No |  |  |
| Follow-up takes place after a sufficient period to allow the effects of policy change to become evident | No |  |  |
| Other factors that could have produced the change (other than policy) identified | No |  |  |
| Criteria for evaluation adequate or clear | No |  |  |
| Implementation | Multiple stakeholders involved in the design and implementation of the action/s | Yes | No stakeholders are specified for the implementation of actions to increase diet diversity.  The institutions responsible for water resource development, water supply and sanitation, civil society, VWASHE, DWASHE are responsible for decreasing personal risk of women and girls during floods.  Multiple stakeholders were consulted in the design of the national adaptation plan. |  |
| Obligations of the various implementers specified – who has to do what? | No |  |  |

Summary

| **Criteria** | **Quality** |
| --- | --- |
| Policy Background | Strong |
| Goals | Needs improvement |
| Resources | Weak |
| Monitoring and Evaluation | Weak |
| Implementation | Needs improvement |

### **Zimbabwe** – Zimbabwe’s National Climate Change Response Strategy

|  | **Criteria** | **Criterion addressed?** | **Explanation** | **Quote** |
| --- | --- | --- | --- | --- |
| Policy Background | Children recognised as disproportionately affected by the impacts of climate change | Yes | Children are described as a vulnerable group | “Mainstream gender, children and youth, people living with HIV and AIDS and other vulnerable groups into all climate change interventions.” |
| Minimum of two context-specific climate-sensitive health risks for children identified | Yes | Climate risk areas: respiratory illnesses; vector-borne diseases; malnutrition and food insecurity; extreme weather events; water- and food-borne diseases; impacts on health care facilities; mental and psychosocial health | “Indoor air pollution is a major cause of concern as it affects mostly women and children who are responsible for collecting and using firewood.”  “An estimated 700,000 to 2.7 million people die of malaria in sub-Saharan Africa each year and 75 per cent of these are children.”  “Children and youth are at increased risk from disease, undernutrition, water scarcity, disasters and the collapse of public services and infrastructure that will be exacerbated by climate change…. Children are often most vulnerable to adverse health effects from environmental hazards because they are not fully developed physically and psychologically.”  “Unsafe drinking water exposes them to the risk of contracting water borne diseases…”  “…lapses in education and insecurity caused by climate-induced behavioural changes and livelihood choices of parents and other family members… may result in displacement, conflict, neglect and abandonment.”  “Children exhibit relatively high levels of awareness and concern about climate change which affects their visions of an anxieties about the future.” |
| Source of background is explicit  Authority (one or more persons, books, scientific articles or sources of information)  Quantitative or qualitative analysis,  Deduction (premises that have been established from authority, observation, intuition or all three) | No | Some statements seem to be based on opinion |  |
| Goals | Goals for child health explicitly stated | Yes |  | “Understand the impacts of climate change on children and youth in Zimbabwe and create an enabling environment that prevents harm to children and youth emanating from pressures of these impacts.” |
| Goals are concrete enough (quantitative where possible and qualitative where not) to be evaluated later | No | No specific health outcomes have been stated |  |
| Goal is clear in its intent and in the mechanism with which to achieve the desired goals, yet does not attempt to prescribe in detail what the change must be | No |  |  |
| Action/s outlined to improve child health | Yes | Incorporating climate change into school curricula is described, but it is unclear whether this includes health information.  Determining vulnerabilities of children, implementing interventions (no further detail provided), providing support to ensure food security and reduce incidences of disease | “Determine the vulnerabilities of children and youth and how these vulnerabilities will be magnified by the impacts of climate change.”  “Identify and implement interventions that protect and empower children in the face of adverse impacts of climate change.”  “Provide support to ensure that all children in Zimbabwe are food secure and able to attend and complete school in a changing climate; and reduce the incidence of diseases in children, especially those associated with climate change.” |
| Mechanisms by which children and/or pregnant women will be specifically targeted by the action are explicitly stated | No | The target demographic is children, but more detail is needed on specific mechanisms |  |
| Minimum of two actions | Yes |  |  |
| Actions comprehensively address climate-sensitive health risks identified in policy background | No |  |  |
| Resources | Financial resources addressed  Estimated financial resources for implementation of the action/s given  Allocated financial resources for implementation of the action/s clear  Rewards/sanctions for spending allocated resources on other programs | Yes | Estimated costs are provided for each action. | “Determine the vulnerabilities…”: USD 1 million  “Identify and implement interventions…”: USD 5 million  “Provide support…”: USD 20 million |
| Human resources addressed | No |  |  |
| Organisational capacity addressed | No |  |  |
| Policy indicated strategies to mobilise required resources | Yes | Potential sources for resource mobilisation are provided, including the government treasury, UNICEF, other UN agencies, other development partners |  |
| Monitoring and Evaluation | Policy indicated monitoring and evaluation mechanisms to track progress on goals for child health | No |  |  |
| Policy nominated a committee or independent body to do evaluation | No |  |  |
| Outcome measures identified for each of the explicit and implicit objectives | No |  |  |
| Data for evaluation will be collected before, during, and after introduction of the new policy | No |  |  |
| Follow-up takes place after a sufficient period to allow the effects of policy change to become evident | No |  |  |
| Other factors that could have produced the change (other than policy) identified | No |  |  |
| Criteria for evaluation adequate or clear | No |  |  |
| Implementation | Multiple stakeholders involved in the design and implementation of the action/s | Yes | MPSE; MHTESTD; MHCC; Research institutions; local authorities; local leaders; development partners; CSOs |  |
| Obligations of the various implementers specified – who has to do what? | No |  |  |

Summary

| **Criteria** | **Quality** |
| --- | --- |
| Policy Background | Needs improvement |
| Goals | Needs improvement |
| Resources | Needs improvement |
| Monitoring and Evaluation | Weak |
| Implementation | Needs improvement |

# REGION OF THE AMERICAS

### **Antigua and Barbuda** – Updated Nationally Determined Contribution

|  | **Criteria** | **Criterion addressed?** | **Explanation** | **Quote** |
| --- | --- | --- | --- | --- |
| Policy Background | Children recognised as disproportionately affected by the impacts of climate change | Yes | Children are described as a vulnerable group | “Antigua and Barbuda is also committed to… [involving] all levels of society in climate action, I particular children and youth (as well as other vulnerable groups…)” |
| Minimum of two context-specific climate-sensitive health risks for children identified | No |  |  |
| Source of background is explicit  Authority (one or more persons, books, scientific articles or sources of information)  Quantitative or qualitative analysis,  Deduction (premises that have been established from authority, observation, intuition or all three) | No |  |  |
| Goals | Goals for child health explicitly stated | No |  |  |
| Goals are concrete enough (quantitative where possible and qualitative where not) to be evaluated later | No |  |  |
| Goal is clear in its intent and in the mechanism with which to achieve the desired goals, yet does not attempt to prescribe in detail what the change must be | No |  |  |
| Action/s outlined to improve child health | No | Increasing climate change education is described, but it is unclear whether this includes health information |  |
| Mechanisms by which children and/or pregnant women will be specifically targeted by the action are explicitly stated | No |  |  |
| Minimum of two actions | No |  |  |
| Actions comprehensively address climate-sensitive health risks identified in policy background | No |  |  |
| Resources | Financial resources addressed  Estimated financial resources for implementation of the action/s given  Allocated financial resources for implementation of the action/s clear  Rewards/sanctions for spending allocated resources on other programs | No |  |  |
| Human resources addressed | No |  |  |
| Organisational capacity addressed | No |  |  |
| Policy indicated strategies to mobilise required resources | No |  |  |
| Monitoring and Evaluation | Policy indicated monitoring and evaluation mechanisms to track progress on goals for child health | No |  |  |
| Policy nominated a committee or independent body to do evaluation | No |  |  |
| Outcome measures identified for each of the explicit and implicit objectives | No |  |  |
| Data for evaluation will be collected before, during, and after introduction of the new policy | No |  |  |
| Follow-up takes place after a sufficient period to allow the effects of policy change to become evident | No |  |  |
| Other factors that could have produced the change (other than policy) identified | No |  |  |
| Criteria for evaluation adequate or clear | No |  |  |
| Implementation | Multiple stakeholders involved in the design and implementation of the action/s | No |  |  |
| Obligations of the various implementers specified – who has to do what? | No |  |  |

Summary

| **Criteria** | **Quality** |
| --- | --- |
| Policy Background | Needs improvement |
| Goals | Weak |
| Resources | Weak |
| Monitoring and Evaluation | Weak |
| Implementation | Weak |

### **Argentina** – National Adaptation Plan

|  | **Criteria** | **Criterion addressed?** | **Explanation** | **Quote** |
| --- | --- | --- | --- | --- |
| Policy Background | Children recognised as disproportionately affected by the impacts of climate change | Yes |  |  |
| Minimum of two context-specific climate-sensitive health risks for children identified | Yes | Climate risk areas identified: heat-related illnesses; malnutrition and food insecurity | “…heat waves increase hospitalizations and deaths of… young children…”  “Development of health recommendations for action and preventive measures for the population in the event of droughts that affect water supply, food production, and forest, pasture and wetland fires, with emphasis on the most vulnerable populations, such as… children…” |
| Source of background is explicit  Authority (one or more persons, books, scientific articles or sources of information)  Quantitative or qualitative analysis,  Deduction (premises that have been established from authority, observation, intuition or all three) | Yes | Authority – consultation with provinces and representatives of the Autonomous City of Buenos Aires (CABA) | “In order to define the scope of the adaptation component of this plan, the priority risks by region associated with regional development management priorities were selected jointly with the provinces and CABA.” |
| Goals | Goals for child health explicitly stated | Yes | Reducing morbidity and mortality, especially among vulnerable populations. Children have been repeatedly referred to in this section, and in the background, as a “vulnerable population”.  Further actions for reducing temperature- and drought-related risks have been described, but no specific goals for child health were explicitly stated in relation to these. | “In order to reduce morbidity and mortality associated with climate variability and climate change, especially among the vulnerable population…” |
| Goals are concrete enough (quantitative where possible and qualitative where not) to be evaluated later | Yes | Morbidity and mortality are health outcomes able to be quantitatively measured.  Further actions on training health teams and reducing temperature- and drought-related risks have been provided, but no specific goals for child health were explicitly stated in relation to these. |  |
| Goal is clear in its intent and in the mechanism with which to achieve the desired goals, yet does not attempt to prescribe in detail what the change must be | No |  |  |
| Action/s outlined to improve child health | Yes | Training health teams to address climate change and health, with consideration for age.  Strengthening the capacity of the health sector to reduce risks related to extreme temperature events, by implementing, updating and maintaining risk prevention plans.  Strengthening the capacity of the health sector to reduce drought-related risks by developing health recommendations and preventive measures. | “Development of training for health teams on the links between climate change and health (including prevention, assessment, surveillance and treatment actions), taking into consideration the cross-cutting approaches of… life courses…”  “Implementation, updating and maintenance of plans to prevent health risks associated with extreme temperature events (heat and cold), with emphasis on the most vulnerable populations (…children…)”  “Development of health recommendations for action and preventive measures for the population in the event of droughts that affect water supply, food production, and forest, pasture and wetland fires, with emphasis on the most vulnerable populations, such as… children…” |
| Mechanisms by which children and/or pregnant women will be specifically targeted by the action are explicitly stated | No | Children are described to be a focus group, but the exact mechanisms by which they will be targeted have not been stated. |  |
| Minimum of two actions | Yes |  |  |
| Actions comprehensively address climate-sensitive health risks identified in policy background | Yes |  |  |
| Resources | Financial resources addressed  Estimated financial resources for implementation of the action/s given  Allocated financial resources for implementation of the action/s clear  Rewards/sanctions for spending allocated resources on other programs | No | No costs associated with the above actions are stated. |  |
| Human resources addressed | No |  |  |
| Organisational capacity addressed | No |  |  |
| Policy indicated strategies to mobilise required resources | No |  |  |
| Monitoring and Evaluation | Policy indicated monitoring and evaluation mechanisms to track progress on goals for child health | No | Under development. |  |
| Policy nominated a committee or independent body to do evaluation | No |  |  |
| Outcome measures identified for each of the explicit and implicit objectives | No |  |  |
| Data for evaluation will be collected before, during, and after introduction of the new policy | No |  |  |
| Follow-up takes place after a sufficient period to allow the effects of policy change to become evident | No |  |  |
| Other factors that could have produced the change (other than policy) identified | No |  |  |
| Criteria for evaluation adequate or clear | No |  |  |
| Implementation | Multiple stakeholders are involved in the design and implementation of the goal/s and action/s | Yes | Multiple stakeholders were consulted in the development of priorities and actions, including provinces and the CABA. The Ministry of Health is responsible for the implementation of the actions. |  |
| Obligations of the various implementers specified – who has to do what? | Yes | The Ministry of Health is wholly responsible for the implementation of the actions. |  |

Summary

| **Criteria** | **Quality** |
| --- | --- |
| Policy Background | Strong |
| Goals | Needs improvement |
| Resources | Weak |
| Monitoring and Evaluation | Weak |
| Implementation | Strong |

### **Bahamas** – National Policy for the Adaptation to Climate Change

|  | **Criteria** | **Criterion addressed?** | **Explanation** | **Quote** |
| --- | --- | --- | --- | --- |
| Policy Background | Children recognised as disproportionately affected by the impacts of climate change | No | No reference to children made. |  |
| Minimum of two context-specific climate-sensitive health risks for children identified | No |  |  |
| Source of background is explicit  Authority (one or more persons, books, scientific articles or sources of information)  Quantitative or qualitative analysis,  Deduction (premises that have been established from authority, observation, intuition or all three) | No |  |  |
| Goals | Goals for child health explicitly stated | No |  |  |
| Goals are concrete enough (quantitative where possible and qualitative where not) to be evaluated later | No |  |  |
| Goal is clear in its intent and in the mechanism with which to achieve the desired goals, yet does not attempt to prescribe in detail what the change must be | No |  |  |
| Action/s outlined to improve child health | No |  |  |
| Mechanisms by which children and/or pregnant women will be specifically targeted by the action are explicitly stated | No |  |  |
| Minimum of two actions | No |  |  |
| Actions comprehensively address climate-sensitive health risks identified in policy background | No |  |  |
| Resources | Financial resources addressed  Estimated financial resources for implementation of the action/s given  Allocated financial resources for implementation of the action/s clear  Rewards/sanctions for spending allocated resources on other programs | No |  |  |
| Human resources addressed | No |  |  |
| Organisational capacity addressed | No |  |  |
| Policy indicated strategies to mobilise required resources |  |  |  |
| Monitoring and Evaluation | Policy indicated monitoring and evaluation mechanisms to track progress on goals for child health | No |  |  |
| Policy nominated a committee or independent body to do evaluation | No |  |  |
| Outcome measures identified for each of the explicit and implicit objectives | No |  |  |
| Data for evaluation will be collected before, during, and after introduction of the new policy | No |  |  |
| Follow-up takes place after a sufficient period to allow the effects of policy change to become evident | No |  |  |
| Other factors that could have produced the change (other than policy) identified | No |  |  |
| Criteria for evaluation adequate or clear | No |  |  |
| Implementation | Multiple stakeholders involved in the design and implementation of the action/s | No |  |  |
| Obligations of the various implementers specified – who has to do what? | No |  |  |

Summary

| **Criteria** | **Quality** |
| --- | --- |
| Policy Background | Weak |
| Goals | Weak |
| Resources | Weak |
| Monitoring and Evaluation | Weak |
| Implementation | Weak |

### **Barbados** – Update of the First Nationally Determined Contribution

|  | **Criteria** | **Criterion addressed?** | **Explanation** | **Quote** |
| --- | --- | --- | --- | --- |
| Policy Background | Children recognised as disproportionately affected by the impacts of climate change | Yes |  | “…climate change will impact already vulnerable groups disproportionately, including youth…” |
| Minimum of two context-specific climate-sensitive health risks for children identified | No |  |  |
| Source of background is explicit  Authority (one or more persons, books, scientific articles or sources of information)  Quantitative or qualitative analysis,  Deduction (premises that have been established from authority, observation, intuition or all three) | No |  |  |
| Goals | Goals for child health explicitly stated | No |  |  |
| Goals are concrete enough (quantitative where possible and qualitative where not) to be evaluated later | No |  |  |
| Goal is clear in its intent and in the mechanism with which to achieve the desired goals, yet does not attempt to prescribe in detail what the change must be | No |  |  |
| Action/s outlined to improve child health | No |  |  |
| Mechanisms by which children and/or pregnant women will be specifically targeted by the action are explicitly stated | No |  |  |
| Minimum of two actions | No |  |  |
| Actions comprehensively address climate-sensitive health risks identified in policy background | No |  |  |
| Resources | Financial resources addressed  Estimated financial resources for implementation of the action/s given  Allocated financial resources for implementation of the action/s clear  Rewards/sanctions for spending allocated resources on other programs | No |  |  |
| Human resources addressed | No |  |  |
| Organisational capacity addressed | No |  |  |
| Policy indicated strategies to mobilise required resources | No |  |  |
| Monitoring and Evaluation | Policy indicated monitoring and evaluation mechanisms to track progress on goals for child health | No |  |  |
| Policy nominated a committee or independent body to do evaluation | No |  |  |
| Outcome measures identified for each of the explicit and implicit objectives | No |  |  |
| Data for evaluation will be collected before, during, and after introduction of the new policy | No |  |  |
| Follow-up takes place after a sufficient period to allow the effects of policy change to become evident | No |  |  |
| Other factors that could have produced the change (other than policy) identified | No |  |  |
| Criteria for evaluation adequate or clear | No |  |  |
| Implementation | Multiple stakeholders involved in the design and implementation of the action/s | No |  |  |
| Obligations of the various implementers specified – who has to do what? | No |  |  |

Summary

| **Criteria** | **Quality** |
| --- | --- |
| Policy Background | Needs improvement |
| Goals | Weak |
| Resources | Weak |
| Monitoring and Evaluation | Weak |
| Implementation | Weak |

### **Belize** – A National Climate Change Policy, Strategy and Action Plan to Address Climate Change in Belize

|  | **Criteria** | **Criterion addressed?** | **Explanation** | **Quote** |
| --- | --- | --- | --- | --- |
| Policy Background | Children recognised as disproportionately affected by the impacts of climate change | No |  |  |
| Minimum of two context-specific climate-sensitive health risks for children identified | No |  |  |
| Source of background is explicit  Authority (one or more persons, books, scientific articles or sources of information)  Quantitative or qualitative analysis,  Deduction (premises that have been established from authority, observation, intuition or all three) | No |  |  |
| Goals | Goals for child health explicitly stated | No |  |  |
| Goals are concrete enough (quantitative where possible and qualitative where not) to be evaluated later | No |  |  |
| Goal is clear in its intent and in the mechanism with which to achieve the desired goals, yet does not attempt to prescribe in detail what the change must be | No |  |  |
| Action/s outlined to improve child health | No |  |  |
| Mechanisms by which children and/or pregnant women will be specifically targeted by the action are explicitly stated | No |  |  |
| Minimum of two actions | No |  |  |
| Actions comprehensively address climate-sensitive health risks identified in policy background | No |  |  |
| Resources | Financial resources addressed  Estimated financial resources for implementation of the action/s given  Allocated financial resources for implementation of the action/s clear  Rewards/sanctions for spending allocated resources on other programs | No |  |  |
| Human resources addressed | No |  |  |
| Organisational capacity addressed | No |  |  |
| Policy indicated strategies to mobilise required resources | No |  |  |
| Monitoring and Evaluation | Policy indicated monitoring and evaluation mechanisms to track progress on goals for child health | No |  |  |
| Policy nominated a committee or independent body to do evaluation | No |  |  |
| Outcome measures identified for each of the explicit and implicit objectives | No |  |  |
| Data for evaluation will be collected before, during, and after introduction of the new policy | No |  |  |
| Follow-up takes place after a sufficient period to allow the effects of policy change to become evident | No |  |  |
| Other factors that could have produced the change (other than policy) identified | No |  |  |
| Criteria for evaluation adequate or clear | No |  |  |
| Implementation | Multiple stakeholders involved in the design and implementation of the action/s | No |  |  |
| Obligations of the various implementers specified – who has to do what? | No |  |  |

Summary

| **Criteria** | **Quality** |
| --- | --- |
| Policy Background | Weak |
| Goals | Weak |
| Resources | Weak |
| Monitoring and Evaluation | Weak |
| Implementation | Weak |

### **Bolivia (Plurinational State of)** – Nationally Determined Contribution of the Plurinational State of Bolivia

|  | **Criteria** | **Criterion addressed?** | **Explanation** | **Quote** |
| --- | --- | --- | --- | --- |
| Policy Background | Children recognised as disproportionately affected by the impacts of climate change | Yes |  | “All Bolivians, especially groups vulnerable to climate change, including… women and children, will have reduced their exposure, and will have increased their adaptive capacity to climate change.” |
| Minimum of two context-specific climate-sensitive health risks for children identified | No | Climate risk areas: extreme weather events | “More than 2.7 million children and adolescents (24% of the population) live in areas at high risk of floods and droughts.” |
| Source of background is explicit  Authority (one or more persons, books, scientific articles or sources of information)  Quantitative or qualitative analysis,  Deduction (premises that have been established from authority, observation, intuition or all three) | Yes | National Statistics Institute (2021), Torrico (2020, UNICEF (2021) |  |
| Goals | Goals for child health explicitly stated | Yes |  | “All Bolivian men and women, and especially groups vulnerable to the climate crisis, including indigenous people, women and children, will have reduced their exposure, sensitivity and increased their adaptive capacity to climate change.” |
| Goals are concrete enough (quantitative where possible and qualitative where not) to be evaluated later | No |  |  |
| Goal is clear in its intent and in the mechanism with which to achieve the desired goals, yet does not attempt to prescribe in detail what the change must be | No |  |  |
| Action/s outlined to improve child health | No |  |  |
| Mechanisms by which children and/or pregnant women will be specifically targeted by the action are explicitly stated | No |  |  |
| Minimum of two actions | No |  |  |
| Actions comprehensively address climate-sensitive health risks identified in policy background | No |  |  |
| Resources | Financial resources addressed  Estimated financial resources for implementation of the action/s given  Allocated financial resources for implementation of the action/s clear  Rewards/sanctions for spending allocated resources on other programs | No |  |  |
| Human resources addressed | No |  |  |
| Organisational capacity addressed | No |  |  |
| Policy indicated strategies to mobilise required resources | No |  |  |
| Monitoring and Evaluation | Policy indicated monitoring and evaluation mechanisms to track progress on goals for child health | No |  |  |
| Policy nominated a committee or independent body to do evaluation | No |  |  |
| Outcome measures identified for each of the explicit and implicit objectives | No |  |  |
| Data for evaluation will be collected before, during, and after introduction of the new policy | No |  |  |
| Follow-up takes place after a sufficient period to allow the effects of policy change to become evident | No |  |  |
| Other factors that could have produced the change (other than policy) identified | No |  |  |
| Criteria for evaluation adequate or clear | No |  |  |
| Implementation | Multiple stakeholders involved in the design and implementation of the action/s | No |  |  |
| Obligations of the various implementers specified – who has to do what? | No |  |  |

Summary

| **Criteria** | **Quality** |
| --- | --- |
| Policy Background | Needs improvement |
| Goals | Needs improvement |
| Resources | Weak |
| Monitoring and Evaluation | Weak |
| Implementation | Weak |

### **Brazil** – National Adaptation Plan to Climate Change

|  | **Criteria** | **Criterion addressed?** | **Explanation** | **Quote** |
| --- | --- | --- | --- | --- |
| Policy Background | Children recognised as disproportionately affected by the impacts of climate change | Yes | Children are referred to as a vulnerable population. | “…most vulnerable populations (…children, pregnant women)…” |
| Minimum of two context-specific climate-sensitive health risks for children identified | Yes | Climate risk areas identified: extreme weather events; communicable diseases; mental and psychosocial health; malnutrition and food insecurity; noncommunicable diseases; respiratory illnesses | “Deaths and hospitalisations related to external causes (drowning, landslides, fractures, trauma etc.)… Increase in infectious diseases, Epidemics… Mental and cardiovascular problems; Malnutrition”  “Increase in infant, and under-5… mortality from respiratory diseases” |
| Source of background is explicit  Authority (one or more persons, books, scientific articles or sources of information)  Quantitative or qualitative analysis,  Deduction (premises that have been established from authority, observation, intuition or all three) | Yes | Scientific articles |  |
| Goals | Goals for child health explicitly stated | No |  |  |
| Goals are concrete enough (quantitative where possible and qualitative where not) to be evaluated later | No |  |  |
| Goal is clear in its intent and in the mechanism with which to achieve the desired goals, yet does not attempt to prescribe in detail what the change must be | No |  |  |
| Action/s outlined to improve child health | No |  |  |
| Mechanisms by which children and/or pregnant women will be specifically targeted by the action are explicitly stated | No |  |  |
| Minimum of two actions | No |  |  |
| Actions comprehensively address climate-sensitive health risks identified in policy background | No |  |  |
| Resources | Financial resources addressed  Estimated financial resources for implementation of the action/s given  Allocated financial resources for implementation of the action/s clear  Rewards/sanctions for spending allocated resources on other programs | No |  |  |
| Human resources addressed | No |  |  |
| Organisational capacity addressed | No |  |  |
| Policy indicated strategies to mobilise required resources | No |  |  |
| Monitoring and Evaluation | Policy indicated monitoring and evaluation mechanisms to track progress on goals for child health | Yes | System for monitoring incidence of respiratory disease in children under 5 years of age.  However, no goals for child health were explicitly stated. | “…the Sentinel Units for monitoring of Populations Exposed to Air Pollution (VIGIAR)… monitors incidences of respiratory diseases attributable to atmospheric pollutants in children under the age of 5 years… the age-groups most vulnerable to air pollution” |
| Policy nominated a committee or independent body to do evaluation | Yes | The system was implemented by the Ministry of Health |  |
| Outcome measures identified for each of the explicit and implicit objectives | No | No child health objectives stated |  |
| Data for evaluation will be collected before, during, and after introduction of the new policy | No | No timeframe for data collection stated |  |
| Follow-up takes place after a sufficient period to allow the effects of policy change to become evident | No |  |  |
| Other factors that could have produced the change (other than policy) identified | No |  |  |
| Criteria for evaluation adequate or clear | No |  |  |
| Implementation | Multiple stakeholders involved in the design and implementation of the action/s | No | No actions for child health stated |  |
| Obligations of the various implementers specified – who has to do what? | No |  |  |

Summary

| **Criteria** | **Quality** |
| --- | --- |
| Policy Background | Strong |
| Goals | Weak |
| Resources | Weak |
| Monitoring and Evaluation | Needs improvement |
| Implementation | Weak |

### **British Virgin Islands** – The Virgin Islands Climate Change Adaptation Policy

|  | **Criteria** | **Criterion addressed?** | **Explanation** | **Quote** |
| --- | --- | --- | --- | --- |
| Policy Background | Children recognised as disproportionately affected by the impacts of climate change | No | A reference to childhood asthma was made, but children were not described as being disproportionately impacted by climate change. |  |
| Minimum of two context-specific climate-sensitive health risks for children identified | No |  |  |
| Source of background is explicit  Authority (one or more persons, books, scientific articles or sources of information)  Quantitative or qualitative analysis,  Deduction (premises that have been established from authority, observation, intuition or all three) | No |  |  |
| Goals | Goals for child health explicitly stated | Yes | Goal is to decrease climate related health impacts. Childhood asthma was provided as an example; no other child health outcomes are described | “Enhance the capacity of the health care sector and the public to deal with climate related health impacts, such as… childhood asthma” |
| Goals are concrete enough (quantitative where possible and qualitative where not) to be evaluated later | No | The full range of “climate related health impacts” was not described. The goal is not concrete enough. |  |
| Goal is clear in its intent and in the mechanism with which to achieve the desired goals, yet does not attempt to prescribe in detail what the change must be | No |  |  |
| Action/s outlined to improve child health | No | Increasing early detection of asthma and developing standard treatment guidelines is described, but links to childhood asthma are not explicitly stated. |  |
| Mechanisms by which children and/or pregnant women will be specifically targeted by the action are explicitly stated | No |  |  |
| Minimum of two actions | No |  |  |
| Actions comprehensively address climate-sensitive health risks identified in policy background | No |  |  |
| Resources | Financial resources addressed  Estimated financial resources for implementation of the action/s given  Allocated financial resources for implementation of the action/s clear  Rewards/sanctions for spending allocated resources on other programs | No |  |  |
| Human resources addressed | No |  |  |
| Organisational capacity addressed | No |  |  |
| Policy indicated strategies to mobilise required resources | No |  |  |
| Monitoring and Evaluation | Policy indicated monitoring and evaluation mechanisms to track progress on goals for child health | No |  |  |
| Policy nominated a committee or independent body to do evaluation | No |  |  |
| Outcome measures identified for each of the explicit and implicit objectives | No |  |  |
| Data for evaluation will be collected before, during, and after introduction of the new policy | No |  |  |
| Follow-up takes place after a sufficient period to allow the effects of policy change to become evident | No |  |  |
| Other factors that could have produced the change (other than policy) identified | No |  |  |
| Criteria for evaluation adequate or clear | No |  |  |
| Implementation | Multiple stakeholders involved in the design and implementation of the action/s | No |  |  |
| Obligations of the various implementers specified – who has to do what? | No |  |  |

Summary

| **Criteria** | **Quality** |
| --- | --- |
| Policy Background | Weak |
| Goals | Needs improvement |
| Resources | Weak |
| Monitoring and Evaluation | Weak |
| Implementation | Weak |

### **Canada** – National Adaptation Strategy

|  | **Criteria** | **Criterion addressed?** | **Explanation** | **Quote** |
| --- | --- | --- | --- | --- |
| Policy Background | Children recognised as disproportionately affected by the impacts of climate change | No | No mention of children in the policy |  |
| Minimum of two context-specific climate-sensitive health risks for children identified | No |  |  |
| Source of background is explicit  Authority (one or more persons, books, scientific articles or sources of information)  Quantitative or qualitative analysis,  Deduction (premises that have been established from authority, observation, intuition or all three) | No |  |  |
| Goals | Goals for child health explicitly stated | No |  |  |
| Goals are concrete enough (quantitative where possible and qualitative where not) to be evaluated later | No |  |  |
| Goal is clear in its intent and in the mechanism with which to achieve the desired goals, yet does not attempt to prescribe in detail what the change must be | No |  |  |
| Action/s outlined to improve child health | No |  |  |
| Mechanisms by which children and/or pregnant women will be specifically targeted by the action are explicitly stated | No |  |  |
| Minimum of two actions | No |  |  |
| Actions comprehensively address climate-sensitive health risks identified in policy background | No |  |  |
| Resources | Financial resources addressed  Estimated financial resources for implementation of the action/s given  Allocated financial resources for implementation of the action/s clear  Rewards/sanctions for spending allocated resources on other programs | No |  |  |
| Human resources addressed | No |  |  |
| Organisational capacity addressed | No |  |  |
| Policy indicated strategies to mobilise required resources | No |  |  |
| Monitoring and Evaluation | Policy indicated monitoring and evaluation mechanisms to track progress on goals for child health | No |  |  |
| Policy nominated a committee or independent body to do evaluation | No |  |  |
| Outcome measures identified for each of the explicit and implicit objectives | No |  |  |
| Data for evaluation will be collected before, during, and after introduction of the new policy | No |  |  |
| Follow-up takes place after a sufficient period to allow the effects of policy change to become evident | No |  |  |
| Other factors that could have produced the change (other than policy) identified | No |  |  |
| Criteria for evaluation adequate or clear | No |  |  |
| Implementation | Multiple stakeholders involved in the design and implementation of the action/s | No |  |  |
| Obligations of the various implementers specified – who has to do what? | No |  |  |

Summary

| **Criteria** | **Quality** |
| --- | --- |
| Policy Background | Weak |
| Goals | Weak |
| Resources | Weak |
| Monitoring and Evaluation | Weak |
| Implementation | Weak |

### **Chile** – Plan Nacional de Adaptación al Cambio Climático

|  | **Criteria** | **Criterion addressed?** | **Explanation** | **Quote** |
| --- | --- | --- | --- | --- |
| Policy Background | Children recognised as disproportionately affected by the impacts of climate change | No |  |  |
| Minimum of two context-specific climate-sensitive health risks for children identified | No |  |  |
| Source of background is explicit  Authority (one or more persons, books, scientific articles or sources of information)  Quantitative or qualitative analysis,  Deduction (premises that have been established from authority, observation, intuition or all three) | No |  |  |
| Goals | Goals for child health explicitly stated | No |  |  |
| Goals are concrete enough (quantitative where possible and qualitative where not) to be evaluated later | No |  |  |
| Goal is clear in its intent and in the mechanism with which to achieve the desired goals, yet does not attempt to prescribe in detail what the change must be | No |  |  |
| Action/s outlined to improve child health | No |  |  |
| Mechanisms by which children and/or pregnant women will be specifically targeted by the action are explicitly stated | No |  |  |
| Minimum of two actions | No |  |  |
| Actions comprehensively address climate-sensitive health risks identified in policy background | No |  |  |
| Resources | Financial resources addressed  Estimated financial resources for implementation of the action/s given  Allocated financial resources for implementation of the action/s clear  Rewards/sanctions for spending allocated resources on other programs | No |  |  |
| Human resources addressed | No |  |  |
| Organisational capacity addressed | No |  |  |
| Policy indicated strategies to mobilise required resources | No |  |  |
| Monitoring and Evaluation | Policy indicated monitoring and evaluation mechanisms to track progress on goals for child health | No |  |  |
| Policy nominated a committee or independent body to do evaluation | No |  |  |
| Outcome measures identified for each of the explicit and implicit objectives | No |  |  |
| Data for evaluation will be collected before, during, and after introduction of the new policy | No |  |  |
| Follow-up takes place after a sufficient period to allow the effects of policy change to become evident | No |  |  |
| Other factors that could have produced the change (other than policy) identified | No |  |  |
| Criteria for evaluation adequate or clear | No |  |  |
| Implementation | Multiple stakeholders involved in the design and implementation of the action/s | No |  |  |
| Obligations of the various implementers specified – who has to do what? | No |  |  |

Summary

| **Criteria** | **Quality** |
| --- | --- |
| Policy Background | Weak |
| Goals | Weak |
| Resources | Weak |
| Monitoring and Evaluation | Weak |
| Implementation | Weak |

### **Colombia** – Plan Nacional de Adaptación al Cambio Climático

|  | **Criteria** | **Criterion addressed?** | **Explanation** | **Quote** |
| --- | --- | --- | --- | --- |
| Policy Background | Children recognised as disproportionately affected by the impacts of climate change | Yes |  |  |
| Minimum of two context-specific climate-sensitive health risks for children identified | No | Climate risk areas: extreme weather events | “At the end of 2011, a total of 470 cases of death from acute diarrheal infection in children under five years of age were observed, higher than the cases that occurred in both 2010 and 2009”  “[floods have a] direct impact on the most vulnerable population (e.g. children, elderly, mothers, etc.). head of household)” |
| Source of background is explicit  Authority (one or more persons, books, scientific articles or sources of information)  Quantitative or qualitative analysis,  Deduction (premises that have been established from authority, observation, intuition or all three) | Yes | Epidemiological Bulletin, UNGRD, WMO, IDEAM |  |
| Goals | Goals for child health explicitly stated | No |  |  |
| Goals are concrete enough (quantitative where possible and qualitative where not) to be evaluated later | No |  |  |
| Goal is clear in its intent and in the mechanism with which to achieve the desired goals, yet does not attempt to prescribe in detail what the change must be | No |  |  |
| Action/s outlined to improve child health | No |  |  |
| Mechanisms by which children and/or pregnant women will be specifically targeted by the action are explicitly stated | No |  |  |
| Minimum of two actions | No |  |  |
| Actions comprehensively address climate-sensitive health risks identified in policy background | No |  |  |
| Resources | Financial resources addressed  Estimated financial resources for implementation of the action/s given  Allocated financial resources for implementation of the action/s clear  Rewards/sanctions for spending allocated resources on other programs | No |  |  |
| Human resources addressed | No |  |  |
| Organisational capacity addressed | No |  |  |
| Policy indicated strategies to mobilise required resources | No |  |  |
| Monitoring and Evaluation | Policy indicated monitoring and evaluation mechanisms to track progress on goals for child health | No |  |  |
| Policy nominated a committee or independent body to do evaluation | No |  |  |
| Outcome measures identified for each of the explicit and implicit objectives | No |  |  |
| Data for evaluation will be collected before, during, and after introduction of the new policy | No |  |  |
| Follow-up takes place after a sufficient period to allow the effects of policy change to become evident | No |  |  |
| Other factors that could have produced the change (other than policy) identified | No |  |  |
| Criteria for evaluation adequate or clear | No |  |  |
| Implementation | Multiple stakeholders involved in the design and implementation of the action/s | No |  |  |
| Obligations of the various implementers specified – who has to do what? | No |  |  |

Summary

| **Criteria** | **Quality** |
| --- | --- |
| Policy Background | Needs improvement |
| Goals | Weak |
| Resources | Weak |
| Monitoring and Evaluation | Weak |
| Implementation | Weak |

### **Costa** **Rica** – Plan Nacional de Adaptación al Cambio Climático 2022-2026

|  | **Criteria** | **Criterion addressed?** | **Explanation** | **Quote** |
| --- | --- | --- | --- | --- |
| Policy Background | Children recognised as disproportionately affected by the impacts of climate change | Yes |  | “…emphasis on the groups that are most vulnerable to climate change, including children, adolescents, young people…” |
| Minimum of two context-specific climate-sensitive health risks for children identified | No | Climate risks: heat-related illnesses | “…children vulnerable to high temperatures and heat islands.” |
| Source of background is explicit  Authority (one or more persons, books, scientific articles or sources of information)  Quantitative or qualitative analysis,  Deduction (premises that have been established from authority, observation, intuition or all three) | Yes | Government publications |  |
| Goals | Goals for child health explicitly stated | No |  |  |
| Goals are concrete enough (quantitative where possible and qualitative where not) to be evaluated later | No |  |  |
| Goal is clear in its intent and in the mechanism with which to achieve the desired goals, yet does not attempt to prescribe in detail what the change must be | No |  |  |
| Action/s outlined to improve child health | No |  |  |
| Mechanisms by which children and/or pregnant women will be specifically targeted by the action are explicitly stated | No |  |  |
| Minimum of two actions | No |  |  |
| Actions comprehensively address climate-sensitive health risks identified in policy background | No |  |  |
| Resources | Financial resources addressed  Estimated financial resources for implementation of the action/s given  Allocated financial resources for implementation of the action/s clear  Rewards/sanctions for spending allocated resources on other programs | No |  |  |
| Human resources addressed | No |  |  |
| Organisational capacity addressed | No |  |  |
| Policy indicated strategies to mobilise required resources | No |  |  |
| Monitoring and Evaluation | Policy indicated monitoring and evaluation mechanisms to track progress on goals for child health | No |  |  |
| Policy nominated a committee or independent body to do evaluation | No |  |  |
| Outcome measures identified for each of the explicit and implicit objectives | No |  |  |
| Data for evaluation will be collected before, during, and after introduction of the new policy | No |  |  |
| Follow-up takes place after a sufficient period to allow the effects of policy change to become evident | No |  |  |
| Other factors that could have produced the change (other than policy) identified | No |  |  |
| Criteria for evaluation adequate or clear | No |  |  |
| Implementation | Multiple stakeholders involved in the design and implementation of the action/s | No |  |  |
| Obligations of the various implementers specified – who has to do what? | No |  |  |

Summary

| **Criteria** | **Quality** |
| --- | --- |
| Policy Background | Needs improvement |
| Goals | Weak |
| Resources | Weak |
| Monitoring and Evaluation | Weak |
| Implementation | Weak |

### **Cuba** – First Nationally Determined Contribution (updated)

|  | **Criteria** | **Criterion addressed?** | **Explanation** | **Quote** |
| --- | --- | --- | --- | --- |
| Policy Background | Children recognised as disproportionately affected by the impacts of climate change | No | No mention of children in the policy |  |
| Minimum of two context-specific climate-sensitive health risks for children identified | No |  |  |
| Source of background is explicit  Authority (one or more persons, books, scientific articles or sources of information)  Quantitative or qualitative analysis,  Deduction (premises that have been established from authority, observation, intuition or all three) | No |  |  |
| Goals | Goals for child health explicitly stated | No |  |  |
| Goals are concrete enough (quantitative where possible and qualitative where not) to be evaluated later | No |  |  |
| Goal is clear in its intent and in the mechanism with which to achieve the desired goals, yet does not attempt to prescribe in detail what the change must be | No |  |  |
| Action/s outlined to improve child health | No |  |  |
| Mechanisms by which children and/or pregnant women will be specifically targeted by the action are explicitly stated | No |  |  |
| Minimum of two actions | No |  |  |
| Actions comprehensively address climate-sensitive health risks identified in policy background | No |  |  |
| Resources | Financial resources addressed  Estimated financial resources for implementation of the action/s given  Allocated financial resources for implementation of the action/s clear  Rewards/sanctions for spending allocated resources on other programs | No |  |  |
| Human resources addressed | No |  |  |
| Organisational capacity addressed | No |  |  |
| Policy indicated strategies to mobilise required resources | No |  |  |
| Monitoring and Evaluation | Policy indicated monitoring and evaluation mechanisms to track progress on goals for child health | No |  |  |
| Policy nominated a committee or independent body to do evaluation | No |  |  |
| Outcome measures identified for each of the explicit and implicit objectives | No |  |  |
| Data for evaluation will be collected before, during, and after introduction of the new policy | No |  |  |
| Follow-up takes place after a sufficient period to allow the effects of policy change to become evident | No |  |  |
| Other factors that could have produced the change (other than policy) identified | No |  |  |
| Criteria for evaluation adequate or clear | No |  |  |
| Implementation | Multiple stakeholders involved in the design and implementation of the action/s | No |  |  |
| Obligations of the various implementers specified – who has to do what? | No |  |  |

Summary

| **Criteria** | **Quality** |
| --- | --- |
| Policy Background | Weak |
| Goals | Weak |
| Resources | Weak |
| Monitoring and Evaluation | Weak |
| Implementation | Weak |

### **Dominica** – Dominica Climate Resilience and Recovery Plan 2020-2030

|  | **Criteria** | **Criterion addressed?** | **Explanation** | **Quote** |
| --- | --- | --- | --- | --- |
| Policy Background | Children recognised as disproportionately affected by the impacts of climate change | No |  |  |
| Minimum of two context-specific climate-sensitive health risks for children identified | No |  |  |
| Source of background is explicit  Authority (one or more persons, books, scientific articles or sources of information)  Quantitative or qualitative analysis,  Deduction (premises that have been established from authority, observation, intuition or all three) | No |  |  |
| Goals | Goals for child health explicitly stated | Yes | Increased resilience via enhanced physical fitness, confidence and self-esteem in primary school children  Reduce violence against women and girls  No goal was explicitly stated in relation to disasters and health outcomes | “Each One Reach One (EORO is an out-of-school program to provide primary school children with the opportunity to enhance their creativity, physical fitness, confidence, and self-esteem thereby increasing resilience”  Outcomes: “More resilient Dominican children”, “Strengthen peer mentorship among children and youth”  “Violence against women and girls significantly reduced” |
| Goals are concrete enough (quantitative where possible and qualitative where not) to be evaluated later | No | “Resilience” is not a concrete enough health outcome to be evaluated later. Additionally, resilience and peer mentorship have not been linked to quantifiable health outcomes  Violence against girls is difficult to assess quantitatively or qualitatively; “significantly” is an unclear term in relation to violence reduction |  |
| Goal is clear in its intent and in the mechanism with which to achieve the desired goals, yet does not attempt to prescribe in detail what the change must be | Yes |  |  |
| Action/s outlined to improve child health | Yes | Each One Reach One – Youth Resilience initiative  Respect for All Initiative  Establishment of regional disaster emergency centres is an ongoing initiative.  School feeding is briefly mentioned under the Enhanced Social Safety Net Initiative. No child health goals were associated with this. | “Each One Reach One (EORO is an out-of-school program to provide primary school children with the opportunity to enhance their creativity, physical fitness, confidence, and self-esteem thereby increasing resilience.”  “Work with teachers, parents, children, youth, young adults to revalue cultural identity, lifestyle decisions, consumption choices and equal responsibilities of men and women”  “Establishment of regional disaster emergency centres – multipurpose buildings that provide emergency shelter for… children… and bulk storage of basic emergency supplies to allow remote communities to effectively respond to emergencies and disasters on their own”  “…expansion of current social safety nets (school feeding…)” |
| Mechanisms by which children and/or pregnant women will be specifically targeted by the action are explicitly stated | Yes | EORO is an out-of-school program targeted towards primary school children, with the goal of expanding to all Dominican primary schools  The Respect for All Initiative involves directly working with teachers, parents, children and youth  Establishment of regional disaster emergency centres does not describe any mechanisms to target children specifically. | “EORO is being piloted in 3 communities: Newtown, Soufriere, and the Kalinago Territory with the goal of expanding to all primary schools in Dominica” |
| Minimum of two actions | Yes |  |  |
| Actions comprehensively address climate-sensitive health risks identified in policy background | No |  |  |
| Resources | Financial resources addressed  Estimated financial resources for implementation of the action/s given  Allocated financial resources for implementation of the action/s clear  Rewards/sanctions for spending allocated resources on other programs | Yes | Estimated financial resources are given (EORO: XCD 180,000 per school per year; Respect for All Initiative: XCD 1.5 million annually). No estimated resources were given for the establishment of regional disaster emergency centres. |  |
| Human resources addressed | No |  |  |
| Organisational capacity addressed | No |  |  |
| Policy indicated strategies to mobilise required resources | No | Unclear funding sources |  |
| Monitoring and Evaluation | Policy indicated monitoring and evaluation mechanisms to track progress on goals for child health | No |  |  |
| Policy nominated a committee or independent body to do evaluation | No |  |  |
| Outcome measures identified for each of the explicit and implicit objectives | No |  |  |
| Data for evaluation will be collected before, during, and after introduction of the new policy | No |  |  |
| Follow-up takes place after a sufficient period to allow the effects of policy change to become evident | No |  |  |
| Other factors that could have produced the change (other than policy) identified | No |  |  |
| Criteria for evaluation adequate or clear | No |  |  |
| Implementation | Multiple stakeholders involved in the design and implementation of the action/s | Yes | EORO: Governmental, youth-led and community organisations  Respect for All Initiative: Governmental, NGOs, media, community organisations | EORO: “Ministry of Youth Development and Empowerment, Youth at Risk, Gender Affairs, Seniors’ Security, and Dominicans With Disabilities; National Youth Council of Dominica; Ministry of Education, Human Resource Planning, Vocational Training and National Excellence; Community organizations (NGOs, youth groups); Each One Reach One initially piloted by CREAD”  Respect for All Initiative: “Ministry of Youth Development and Empowerment, Youth At Risk, Gender Affairs, Seniors’ Security, and Dominicans With Disabilities; Ministry of the Environment, Rural Modernisation and Kalinago Upliftment; Women’s Bureau; Kalinago Village Council; Community Practitioners Platform; Non-governmental organizations; National media and social media” |
| Obligations of the various implementers specified – who has to do what? | No |  |  |

Summary

| **Criteria** | **Quality** |
| --- | --- |
| Policy Background | Weak |
| Goals | Needs improvement |
| Resources | Needs improvement |
| Monitoring and Evaluation | Weak |
| Implementation | Needs improvement |

### **Dominican** **Republic** – Política Nacional de Cambio Climático (PNCC)

|  | **Criteria** | **Criterion addressed?** | **Explanation** | **Quote** |
| --- | --- | --- | --- | --- |
| Policy Background | Children recognised as disproportionately affected by the impacts of climate change | No | No mention of children in the policy |  |
| Minimum of two context-specific climate-sensitive health risks for children identified | No |  |  |
| Source of background is explicit  Authority (one or more persons, books, scientific articles or sources of information)  Quantitative or qualitative analysis,  Deduction (premises that have been established from authority, observation, intuition or all three) | No |  |  |
| Goals | Goals for child health explicitly stated | No |  |  |
| Goals are concrete enough (quantitative where possible and qualitative where not) to be evaluated later | No |  |  |
| Goal is clear in its intent and in the mechanism with which to achieve the desired goals, yet does not attempt to prescribe in detail what the change must be | No |  |  |
| Action/s outlined to improve child health | No |  |  |
| Mechanisms by which children and/or pregnant women will be specifically targeted by the action are explicitly stated | No |  |  |
| Minimum of two actions | No |  |  |
| Actions comprehensively address climate-sensitive health risks identified in policy background | No |  |  |
| Resources | Financial resources addressed  Estimated financial resources for implementation of the action/s given  Allocated financial resources for implementation of the action/s clear  Rewards/sanctions for spending allocated resources on other programs | No |  |  |
| Human resources addressed | No |  |  |
| Organisational capacity addressed | No |  |  |
| Policy indicated strategies to mobilise required resources | No |  |  |
| Monitoring and Evaluation | Policy indicated monitoring and evaluation mechanisms to track progress on goals for child health | No |  |  |
| Policy nominated a committee or independent body to do evaluation | No |  |  |
| Outcome measures identified for each of the explicit and implicit objectives | No |  |  |
| Data for evaluation will be collected before, during, and after introduction of the new policy | No |  |  |
| Follow-up takes place after a sufficient period to allow the effects of policy change to become evident | No |  |  |
| Other factors that could have produced the change (other than policy) identified | No |  |  |
| Criteria for evaluation adequate or clear | No |  |  |
| Implementation | Multiple stakeholders involved in the design and implementation of the action/s | No |  |  |
| Obligations of the various implementers specified – who has to do what? | No |  |  |

Summary

| **Criteria** | **Quality** |
| --- | --- |
| Policy Background | Weak |
| Goals | Weak |
| Resources | Weak |
| Monitoring and Evaluation | Weak |
| Implementation | Weak |

### **Ecuador** – Plan Nacional de Adaptación al Cambio Climático del Ecuador (2023-2027)

|  | **Criteria** | **Criterion addressed?** | **Explanation** | **Quote** |
| --- | --- | --- | --- | --- |
| Policy Background | Children recognised as disproportionately affected by the impacts of climate change | No |  |  |
| Minimum of two context-specific climate-sensitive health risks for children identified | No |  |  |
| Source of background is explicit  Authority (one or more persons, books, scientific articles or sources of information)  Quantitative or qualitative analysis,  Deduction (premises that have been established from authority, observation, intuition or all three) | No |  |  |
| Goals | Goals for child health explicitly stated | No |  |  |
| Goals are concrete enough (quantitative where possible and qualitative where not) to be evaluated later | No |  |  |
| Goal is clear in its intent and in the mechanism with which to achieve the desired goals, yet does not attempt to prescribe in detail what the change must be | No |  |  |
| Action/s outlined to improve child health | No |  |  |
| Mechanisms by which children and/or pregnant women will be specifically targeted by the action are explicitly stated | No |  |  |
| Minimum of two actions | No |  |  |
| Actions comprehensively address climate-sensitive health risks identified in policy background | No |  |  |
| Resources | Financial resources addressed  Estimated financial resources for implementation of the action/s given  Allocated financial resources for implementation of the action/s clear  Rewards/sanctions for spending allocated resources on other programs | No |  |  |
| Human resources addressed | No |  |  |
| Organisational capacity addressed | No |  |  |
| Policy indicated strategies to mobilise required resources | No |  |  |
| Monitoring and Evaluation | Policy indicated monitoring and evaluation mechanisms to track progress on goals for child health | No |  |  |
| Policy nominated a committee or independent body to do evaluation | No |  |  |
| Outcome measures identified for each of the explicit and implicit objectives | No |  |  |
| Data for evaluation will be collected before, during, and after introduction of the new policy | No |  |  |
| Follow-up takes place after a sufficient period to allow the effects of policy change to become evident | No |  |  |
| Other factors that could have produced the change (other than policy) identified | No |  |  |
| Criteria for evaluation adequate or clear | No |  |  |
| Implementation | Multiple stakeholders involved in the design and implementation of the action/s | No |  |  |
| Obligations of the various implementers specified – who has to do what? | No |  |  |

Summary

| **Criteria** | **Quality** |
| --- | --- |
| Policy Background | Weak |
| Goals | Weak |
| Resources | Weak |
| Monitoring and Evaluation | Weak |
| Implementation | Weak |

### **El Salvador** – Plan Nacional de Adaptación al Cambio Climático

|  | **Criteria** | **Criterion addressed?** | **Explanation** | **Quote** |
| --- | --- | --- | --- | --- |
| Policy Background | Children recognised as disproportionately affected by the impacts of climate change | No |  |  |
| Minimum of two context-specific climate-sensitive health risks for children identified | No |  |  |
| Source of background is explicit  Authority (one or more persons, books, scientific articles or sources of information)  Quantitative or qualitative analysis,  Deduction (premises that have been established from authority, observation, intuition or all three) | No |  |  |
| Goals | Goals for child health explicitly stated | No |  |  |
| Goals are concrete enough (quantitative where possible and qualitative where not) to be evaluated later | No |  |  |
| Goal is clear in its intent and in the mechanism with which to achieve the desired goals, yet does not attempt to prescribe in detail what the change must be | No |  |  |
| Action/s outlined to improve child health | No |  |  |
| Mechanisms by which children and/or pregnant women will be specifically targeted by the action are explicitly stated | No |  |  |
| Minimum of two actions | No |  |  |
| Actions comprehensively address climate-sensitive health risks identified in policy background | No |  |  |
| Resources | Financial resources addressed  Estimated financial resources for implementation of the action/s given  Allocated financial resources for implementation of the action/s clear  Rewards/sanctions for spending allocated resources on other programs | No |  |  |
| Human resources addressed | No |  |  |
| Organisational capacity addressed | No |  |  |
| Policy indicated strategies to mobilise required resources | No |  |  |
| Monitoring and Evaluation | Policy indicated monitoring and evaluation mechanisms to track progress on goals for child health | No |  |  |
| Policy nominated a committee or independent body to do evaluation | No |  |  |
| Outcome measures identified for each of the explicit and implicit objectives | No |  |  |
| Data for evaluation will be collected before, during, and after introduction of the new policy | No |  |  |
| Follow-up takes place after a sufficient period to allow the effects of policy change to become evident | No |  |  |
| Other factors that could have produced the change (other than policy) identified | No |  |  |
| Criteria for evaluation adequate or clear | No |  |  |
| Implementation | Multiple stakeholders involved in the design and implementation of the action/s | No |  |  |
| Obligations of the various implementers specified – who has to do what? | No |  |  |

Summary

| **Criteria** | **Quality** |
| --- | --- |
| Policy Background | Weak |
| Goals | Weak |
| Resources | Weak |
| Monitoring and Evaluation | Weak |
| Implementation | Weak |

### **Grenada** – Second Nationally Determined Contribution

|  | **Criteria** | **Criterion addressed?** | **Explanation** | **Quote** |
| --- | --- | --- | --- | --- |
| Policy Background | Children recognised as disproportionately affected by the impacts of climate change | No |  |  |
| Minimum of two context-specific climate-sensitive health risks for children identified | No |  |  |
| Source of background is explicit  Authority (one or more persons, books, scientific articles or sources of information)  Quantitative or qualitative analysis,  Deduction (premises that have been established from authority, observation, intuition or all three) | No |  |  |
| Goals | Goals for child health explicitly stated | No |  |  |
| Goals are concrete enough (quantitative where possible and qualitative where not) to be evaluated later | No |  |  |
| Goal is clear in its intent and in the mechanism with which to achieve the desired goals, yet does not attempt to prescribe in detail what the change must be | No |  |  |
| Action/s outlined to improve child health | No |  |  |
| Mechanisms by which children and/or pregnant women will be specifically targeted by the action are explicitly stated | No |  |  |
| Minimum of two actions | No |  |  |
| Actions comprehensively address climate-sensitive health risks identified in policy background | No |  |  |
| Resources | Financial resources addressed  Estimated financial resources for implementation of the action/s given  Allocated financial resources for implementation of the action/s clear  Rewards/sanctions for spending allocated resources on other programs | No |  |  |
| Human resources addressed | No |  |  |
| Organisational capacity addressed | No |  |  |
| Policy indicated strategies to mobilise required resources | No |  |  |
| Monitoring and Evaluation | Policy indicated monitoring and evaluation mechanisms to track progress on goals for child health | No |  |  |
| Policy nominated a committee or independent body to do evaluation | No |  |  |
| Outcome measures identified for each of the explicit and implicit objectives | No |  |  |
| Data for evaluation will be collected before, during, and after introduction of the new policy | No |  |  |
| Follow-up takes place after a sufficient period to allow the effects of policy change to become evident | No |  |  |
| Other factors that could have produced the change (other than policy) identified | No |  |  |
| Criteria for evaluation adequate or clear | No |  |  |
| Implementation | Multiple stakeholders involved in the design and implementation of the action/s | No |  |  |
| Obligations of the various implementers specified – who has to do what? | No |  |  |

Summary

| **Criteria** | **Quality** |
| --- | --- |
| Policy Background | Weak |
| Goals | Weak |
| Resources | Weak |
| Monitoring and Evaluation | Weak |
| Implementation | Weak |

### Guatemala – Plan de Acción Nacional de Cambio Climático

|  | **Criteria** | **Criterion addressed?** | **Explanation** | **Quote** |
| --- | --- | --- | --- | --- |
| Policy Background | Children recognised as disproportionately affected by the impacts of climate change | Yes |  | “…attention to the most vulnerable populations (women, children…)” |
| Minimum of two context-specific climate-sensitive health risks for children identified | No | Climate risks: malnutrition and food insecurity | “As a result of the losses and damages in the agricultural sector caused by the effects of climate change, families are forced to make changes in their diets in order to make better use of economic and food resources, consuming less food and of lower quality, which directly affects the nutritional status of the population, especially children under 5 years of age, causing malnutrition levels to increase” |
| Source of background is explicit  Authority (one or more persons, books, scientific articles or sources of information)  Quantitative or qualitative analysis,  Deduction (premises that have been established from authority, observation, intuition or all three) | Yes | Scientific articles |  |
| Goals | Goals for child health explicitly stated | No |  |  |
| Goals are concrete enough (quantitative where possible and qualitative where not) to be evaluated later | No |  |  |
| Goal is clear in its intent and in the mechanism with which to achieve the desired goals, yet does not attempt to prescribe in detail what the change must be | No |  |  |
| Action/s outlined to improve child health | No |  |  |
| Mechanisms by which children and/or pregnant women will be specifically targeted by the action are explicitly stated | No |  |  |
| Minimum of two actions | No |  |  |
| Actions comprehensively address climate-sensitive health risks identified in policy background | No |  |  |
| Resources | Financial resources addressed  Estimated financial resources for implementation of the action/s given  Allocated financial resources for implementation of the action/s clear  Rewards/sanctions for spending allocated resources on other programs | No |  |  |
| Human resources addressed | No |  |  |
| Organisational capacity addressed | No |  |  |
| Policy indicated strategies to mobilise required resources | No |  |  |
| Monitoring and Evaluation | Policy indicated monitoring and evaluation mechanisms to track progress on goals for child health | No |  |  |
| Policy nominated a committee or independent body to do evaluation | No |  |  |
| Outcome measures identified for each of the explicit and implicit objectives | No |  |  |
| Data for evaluation will be collected before, during, and after introduction of the new policy | No |  |  |
| Follow-up takes place after a sufficient period to allow the effects of policy change to become evident | No |  |  |
| Other factors that could have produced the change (other than policy) identified | No |  |  |
| Criteria for evaluation adequate or clear | No |  |  |
| Implementation | Multiple stakeholders involved in the design and implementation of the action/s | No |  |  |
| Obligations of the various implementers specified – who has to do what? | No |  |  |

Summary

| **Criteria** | **Quality** |
| --- | --- |
| Policy Background | Needs improvement |
| Goals | Weak |
| Resources | Weak |
| Monitoring and Evaluation | Weak |
| Implementation | Weak |

### **Guyana** – National Climate Change Policy and Action Plan 2020-2030

|  | **Criteria** | **Criterion addressed?** | **Explanation** | **Quote** |
| --- | --- | --- | --- | --- |
| Policy Background | Children recognised as disproportionately affected by the impacts of climate change | Yes | Children are described as a vulnerable group to climate hazards and mercury contamination due to gold mining |  |
| Minimum of two context-specific climate-sensitive health risks for children identified | No | Climate risk areas identified: extreme weather events | “Due to the geographical distributions of climate hazards, the underlying socioeconomic determinants of vulnerability and weaknesses in government and community capacity to respond, the effects will disproportionately affect vulnerable groups including… children…” |
| Source of background is explicit  Authority (one or more persons, books, scientific articles or sources of information)  Quantitative or qualitative analysis,  Deduction (premises that have been established from authority, observation, intuition or all three) | Yes | Previous national documents, interviews with policymakers, national consultations |  |
| Goals | Goals for child health explicitly stated | No |  |  |
| Goals are concrete enough (quantitative where possible and qualitative where not) to be evaluated later | No |  |  |
| Goal is clear in its intent and in the mechanism with which to achieve the desired goals, yet does not attempt to prescribe in detail what the change must be | No |  |  |
| Action/s outlined to improve child health | No |  |  |
| Mechanisms by which children and/or pregnant women will be specifically targeted by the action are explicitly stated | No |  |  |
| Minimum of two actions | No |  |  |
| Actions comprehensively address climate-sensitive health risks identified in policy background | No |  |  |
| Resources | Financial resources addressed  Estimated financial resources for implementation of the action/s given  Allocated financial resources for implementation of the action/s clear  Rewards/sanctions for spending allocated resources on other programs | No |  |  |
| Human resources addressed | No |  |  |
| Organisational capacity addressed | No |  |  |
| Policy indicated strategies to mobilise required resources | No |  |  |
| Monitoring and Evaluation | Policy indicated monitoring and evaluation mechanisms to track progress on goals for child health | No |  |  |
| Policy nominated a committee or independent body to do evaluation | No |  |  |
| Outcome measures identified for each of the explicit and implicit objectives | No |  |  |
| Data for evaluation will be collected before, during, and after introduction of the new policy | No |  |  |
| Follow-up takes place after a sufficient period to allow the effects of policy change to become evident | No |  |  |
| Other factors that could have produced the change (other than policy) identified | No |  |  |
| Criteria for evaluation adequate or clear | No |  |  |
| Implementation | Multiple stakeholders involved in the design and implementation of the action/s | No | No actions for child health stated |  |
| Obligations of the various implementers specified – who has to do what? | No |  |  |

Summary

| **Criteria** | **Quality** |
| --- | --- |
| Policy Background | Needs improvement |
| Goals | Weak |
| Resources | Weak |
| Monitoring and Evaluation | Weak |
| Implementation | Weak |

### **Haiti** – Plan National d’Adaptation au Changement Climatique (PNA) 2022-2030

|  | **Criteria** | **Criterion addressed?** | **Explanation** | **Quote** |
| --- | --- | --- | --- | --- |
| Policy Background | Children recognised as disproportionately affected by the impacts of climate change | No |  |  |
| Minimum of two context-specific climate-sensitive health risks for children identified | No |  |  |
| Source of background is explicit  Authority (one or more persons, books, scientific articles or sources of information)  Quantitative or qualitative analysis,  Deduction (premises that have been established from authority, observation, intuition or all three) | No |  |  |
| Goals | Goals for child health explicitly stated | No |  |  |
| Goals are concrete enough (quantitative where possible and qualitative where not) to be evaluated later | No |  |  |
| Goal is clear in its intent and in the mechanism with which to achieve the desired goals, yet does not attempt to prescribe in detail what the change must be | No |  |  |
| Action/s outlined to improve child health | No | “birth management” is listed but more detail is needed. |  |
| Mechanisms by which children and/or pregnant women will be specifically targeted by the action are explicitly stated | No |  |  |
| Minimum of two actions | No |  |  |
| Actions comprehensively address climate-sensitive health risks identified in policy background | No |  |  |
| Resources | Financial resources addressed  Estimated financial resources for implementation of the action/s given  Allocated financial resources for implementation of the action/s clear  Rewards/sanctions for spending allocated resources on other programs | No |  |  |
| Human resources addressed | No |  |  |
| Organisational capacity addressed | No |  |  |
| Policy indicated strategies to mobilise required resources | No |  |  |
| Monitoring and Evaluation | Policy indicated monitoring and evaluation mechanisms to track progress on goals for child health | No |  |  |
| Policy nominated a committee or independent body to do evaluation | No |  |  |
| Outcome measures identified for each of the explicit and implicit objectives | No |  |  |
| Data for evaluation will be collected before, during, and after introduction of the new policy | No |  |  |
| Follow-up takes place after a sufficient period to allow the effects of policy change to become evident | No |  |  |
| Other factors that could have produced the change (other than policy) identified | No |  |  |
| Criteria for evaluation adequate or clear | No |  |  |
| Implementation | Multiple stakeholders involved in the design and implementation of the action/s | No |  |  |
| Obligations of the various implementers specified – who has to do what? | No |  |  |

Summary

| **Criteria** | **Quality** |
| --- | --- |
| Policy Background | Weak |
| Goals | Weak |
| Resources | Weak |
| Monitoring and Evaluation | Weak |
| Implementation | Weak |

### **Honduras** – Plan Nacional de Adaptación al Cambio Climático

|  | **Criteria** | **Criterion addressed?** | **Explanation** | **Quote** |
| --- | --- | --- | --- | --- |
| Policy Background | Children recognised as disproportionately affected by the impacts of climate change | Yes | Children are described as a vulnerable group | “…the focus on age and groups living in greater vulnerability is included to ensure that the situations of CC impacts, vulnerability and adaptive capacity identified, as well as the proposed adaptation measures, are inclusive and consider the specific realities of different actors, including… adolescents and children, among others.” |
| Minimum of two context-specific climate-sensitive health risks for children identified | Yes | Climate risks: extreme weather events; malnutrition and food insecurity; parasitic disease | “1,350,000 people affected by the drought. Of these, 169,000 are children under 5 years of age with severe chronic malnutrition (OCHA, 2016).”  “Increase in the population of children with malnutrition and parasitic diseases” |
| Source of background is explicit  Authority (one or more persons, books, scientific articles or sources of information)  Quantitative or qualitative analysis,  Deduction (premises that have been established from authority, observation, intuition or all three) | Yes | Scientific publications |  |
| Goals | Goals for child health explicitly stated | No |  |  |
| Goals are concrete enough (quantitative where possible and qualitative where not) to be evaluated later | No |  |  |
| Goal is clear in its intent and in the mechanism with which to achieve the desired goals, yet does not attempt to prescribe in detail what the change must be | No |  |  |
| Action/s outlined to improve child health | Yes | Improving care of diseases relating to temperature, via capacity building of primary care health personnel and provision of equipment, implements and medicines | “Strengthening protocols of arterial disease care in vulnerable populations (the elderly, children, chronic patients and pregnant women) by increase in temperature… [via] Capacity building for primary care health personnel for the treatment of arterial diseases; Provision of equipment, implements and medicines for the care of arterial diseases in the different health centers, especially in hot and coastal regions.” |
| Mechanisms by which children and/or pregnant women will be specifically targeted by the action are explicitly stated | Yes | Training of primary care health personnel on treatment of children and pregnant women |  |
| Minimum of two actions | No |  |  |
| Actions comprehensively address climate-sensitive health risks identified in policy background | No |  |  |
| Resources | Financial resources addressed  Estimated financial resources for implementation of the action/s given  Allocated financial resources for implementation of the action/s clear  Rewards/sanctions for spending allocated resources on other programs | No |  |  |
| Human resources addressed | No |  |  |
| Organisational capacity addressed | No |  |  |
| Policy indicated strategies to mobilise required resources | No |  |  |
| Monitoring and Evaluation | Policy indicated monitoring and evaluation mechanisms to track progress on goals for child health | No |  |  |
| Policy nominated a committee or independent body to do evaluation | No |  |  |
| Outcome measures identified for each of the explicit and implicit objectives | No |  |  |
| Data for evaluation will be collected before, during, and after introduction of the new policy | No |  |  |
| Follow-up takes place after a sufficient period to allow the effects of policy change to become evident | No |  |  |
| Other factors that could have produced the change (other than policy) identified | No |  |  |
| Criteria for evaluation adequate or clear | No |  |  |
| Implementation | Multiple stakeholders involved in the design and implementation of the action/s | No | Unclear |  |
| Obligations of the various implementers specified – who has to do what? | No |  |  |

Summary

| **Criteria** | **Quality** |
| --- | --- |
| Policy Background | Strong |
| Goals | Needs improvement |
| Resources | Weak |
| Monitoring and Evaluation | Weak |
| Implementation | Weak |

### **Jamaica** – Climate Change Policy Framework for Jamaica

|  | **Criteria** | **Criterion addressed?** | **Explanation** | **Quote** |
| --- | --- | --- | --- | --- |
| Policy Background | Children recognised as disproportionately affected by the impacts of climate change | Yes |  |  |
| Minimum of two context-specific climate-sensitive health risks for children identified | Yes | Climate risk areas identified: heat-related illnesses; respiratory illnesses; malnutrition and food insecurity | “Health risks from heat exposure to those using the public transportation system, especially for children and the elderly”  “A higher occurrence of respiratory diseases and heat and stress-related illnesses and conditions caused by the ‘urban heat island effect.’ This could directly increase morbidity and mortality rates, particularly in the young and the elderly”  “[UNICEF] has noted that children will suffer malnourishment and food insecurity due to climate change, are at risk of becoming environmental refugees and will experience higher vulnerability to disease, heatstroke and resource shortages.”  “Youth, in particular, unemployed inner-city youth have been identified as one of the most vulnerable to the impacts of climate change.” |
| Source of background is explicit  Authority (one or more persons, books, scientific articles or sources of information)  Quantitative or qualitative analysis,  Deduction (premises that have been established from authority, observation, intuition or all three) | Yes | UNICEF, scientific articles |  |
| Goals | Goals for child health explicitly stated | No |  |  |
| Goals are concrete enough (quantitative where possible and qualitative where not) to be evaluated later | No |  |  |
| Goal is clear in its intent and in the mechanism with which to achieve the desired goals, yet does not attempt to prescribe in detail what the change must be | No |  |  |
| Action/s outlined to improve child health | No | Integrating climate change issues into academic curricula and communicating climate action geared towards children and youth. It is unclear whether this includes health information. |  |
| Mechanisms by which children and/or pregnant women will be specifically targeted by the action are explicitly stated | No |  |  |
| Minimum of two actions | No |  |  |
| Actions comprehensively address climate-sensitive health risks identified in policy background | No |  |  |
| Resources | Financial resources addressed  Estimated financial resources for implementation of the action/s given  Allocated financial resources for implementation of the action/s clear  Rewards/sanctions for spending allocated resources on other programs | No |  |  |
| Human resources addressed | No |  |  |
| Organisational capacity addressed | No |  |  |
| Policy indicated strategies to mobilise required resources | No |  |  |
| Monitoring and Evaluation | Policy indicated monitoring and evaluation mechanisms to track progress on goals for child health | No |  |  |
| Policy nominated a committee or independent body to do evaluation | No |  |  |
| Outcome measures identified for each of the explicit and implicit objectives | No |  |  |
| Data for evaluation will be collected before, during, and after introduction of the new policy | No |  |  |
| Follow-up takes place after a sufficient period to allow the effects of policy change to become evident | No |  |  |
| Other factors that could have produced the change (other than policy) identified | No |  |  |
| Criteria for evaluation adequate or clear | No |  |  |
| Implementation | Multiple stakeholders involved in the design and implementation of the action/s | No |  |  |
| Obligations of the various implementers specified – who has to do what? | No |  |  |

Summary

| **Criteria** | **Quality** |
| --- | --- |
| Policy Background | Needs improvement |
| Goals | Weak |
| Resources | Weak |
| Monitoring and Evaluation | Weak |
| Implementation | Weak |
| Obligations | Weak |

### **Mexico** - Estrategia Nacional de Cambio Climático

|  | **Criteria** | **Criterion addressed?** | **Explanation** | **Quote** |
| --- | --- | --- | --- | --- |
| Policy Background | Children recognised as disproportionately affected by the impacts of climate change | No | No mention of children in the policy |  |
| Minimum of two context-specific climate-sensitive health risks for children identified | No |  |  |
| Source of background is explicit  Authority (one or more persons, books, scientific articles or sources of information)  Quantitative or qualitative analysis,  Deduction (premises that have been established from authority, observation, intuition or all three) | No |  |  |
| Goals | Goals for child health explicitly stated | No |  |  |
| Goals are concrete enough (quantitative where possible and qualitative where not) to be evaluated later | No |  |  |
| Goal is clear in its intent and in the mechanism with which to achieve the desired goals, yet does not attempt to prescribe in detail what the change must be | No |  |  |
| Action/s outlined to improve child health | No |  |  |
| Mechanisms by which children and/or pregnant women will be specifically targeted by the action are explicitly stated | No |  |  |
| Minimum of two actions | No |  |  |
| Actions comprehensively address climate-sensitive health risks identified in policy background | No |  |  |
| Resources | Financial resources addressed  Estimated financial resources for implementation of the action/s given  Allocated financial resources for implementation of the action/s clear  Rewards/sanctions for spending allocated resources on other programs | No |  |  |
| Human resources addressed | No |  |  |
| Organisational capacity addressed | No |  |  |
| Policy indicated strategies to mobilise required resources | No |  |  |
| Monitoring and Evaluation | Policy indicated monitoring and evaluation mechanisms to track progress on goals for child health | No |  |  |
| Policy nominated a committee or independent body to do evaluation | No |  |  |
| Outcome measures identified for each of the explicit and implicit objectives | No |  |  |
| Data for evaluation will be collected before, during, and after introduction of the new policy | No |  |  |
| Follow-up takes place after a sufficient period to allow the effects of policy change to become evident | No |  |  |
| Other factors that could have produced the change (other than policy) identified | No |  |  |
| Criteria for evaluation adequate or clear | No |  |  |
| Implementation | Multiple stakeholders involved in the design and implementation of the action/s | No |  |  |
| Obligations of the various implementers specified – who has to do what? | No |  |  |

Summary

| **Criteria** | **Quality** |
| --- | --- |
| Policy Background | Weak |
| Goals | Weak |
| Resources | Weak |
| Monitoring and Evaluation | Weak |
| Implementation | Weak |

### **Nicaragua** - Contribución Nacionalmente Determinada de Nicaragua

|  | **Criteria** | **Criterion addressed?** | **Explanation** | **Quote** |
| --- | --- | --- | --- | --- |
| Policy Background | Children recognised as disproportionately affected by the impacts of climate change | No |  |  |
| Minimum of two context-specific climate-sensitive health risks for children identified | No |  |  |
| Source of background is explicit  Authority (one or more persons, books, scientific articles or sources of information)  Quantitative or qualitative analysis,  Deduction (premises that have been established from authority, observation, intuition or all three) | No |  |  |
| Goals | Goals for child health explicitly stated | No |  |  |
| Goals are concrete enough (quantitative where possible and qualitative where not) to be evaluated later | No |  |  |
| Goal is clear in its intent and in the mechanism with which to achieve the desired goals, yet does not attempt to prescribe in detail what the change must be | No |  |  |
| Action/s outlined to improve child health | No |  |  |
| Mechanisms by which children and/or pregnant women will be specifically targeted by the action are explicitly stated | No |  |  |
| Minimum of two actions | No |  |  |
| Actions comprehensively address climate-sensitive health risks identified in policy background | No |  |  |
| Resources | Financial resources addressed  Estimated financial resources for implementation of the action/s given  Allocated financial resources for implementation of the action/s clear  Rewards/sanctions for spending allocated resources on other programs | No |  |  |
| Human resources addressed | No |  |  |
| Organisational capacity addressed | No |  |  |
| Policy indicated strategies to mobilise required resources | No |  |  |
| Monitoring and Evaluation | Policy indicated monitoring and evaluation mechanisms to track progress on goals for child health | No |  |  |
| Policy nominated a committee or independent body to do evaluation | No |  |  |
| Outcome measures identified for each of the explicit and implicit objectives | No |  |  |
| Data for evaluation will be collected before, during, and after introduction of the new policy | No |  |  |
| Follow-up takes place after a sufficient period to allow the effects of policy change to become evident | No |  |  |
| Other factors that could have produced the change (other than policy) identified | No |  |  |
| Criteria for evaluation adequate or clear | No |  |  |
| Implementation | Multiple stakeholders involved in the design and implementation of the action/s | No |  |  |
| Obligations of the various implementers specified – who has to do what? | No |  |  |

Summary

| **Criteria** | **Quality** |
| --- | --- |
| Policy Background | Weak |
| Goals | Weak |
| Resources | Weak |
| Monitoring and Evaluation | Weak |
| Implementation | Weak |

### **Panama** – Contribución Determinada a Nivel Nacional de Panama (CDN1)

|  | **Criteria** | **Criterion addressed?** | **Explanation** | **Quote** |
| --- | --- | --- | --- | --- |
| Policy Background | Children recognised as disproportionately affected by the impacts of climate change | Yes |  | “…the conditions of unequal opportunities to face natural hazards, the distribution of poverty, the need for greater follow-up of works or actions to counteract climate effects, as well as the challenge of greater coordination among all stakeholders, increase the conditions of vulnerability and are expressed more significantly in the population with scarce resources, mostly adults, particularly women and children in poverty…” |
| Minimum of two context-specific climate-sensitive health risks for children identified | No | Climate risks: extreme weather events | “According to statistical and meteorological records, since 2004 there has been an increase in the frequency of extreme events in the country, with hydrometeorological events affecting the most different ecosystems, as well as the most vulnerable population, including women, children…” |
| Source of background is explicit  Authority (one or more persons, books, scientific articles or sources of information)  Quantitative or qualitative analysis,  Deduction (premises that have been established from authority, observation, intuition or all three) | Yes | Statistical and metereological records |  |
| Goals | Goals for child health explicitly stated | No |  |  |
| Goals are concrete enough (quantitative where possible and qualitative where not) to be evaluated later | No |  |  |
| Goal is clear in its intent and in the mechanism with which to achieve the desired goals, yet does not attempt to prescribe in detail what the change must be | No |  |  |
| Action/s outlined to improve child health | No |  |  |
| Mechanisms by which children and/or pregnant women will be specifically targeted by the action are explicitly stated | No |  |  |
| Minimum of two actions | No |  |  |
| Actions comprehensively address climate-sensitive health risks identified in policy background | No |  |  |
| Resources | Financial resources addressed  Estimated financial resources for implementation of the action/s given  Allocated financial resources for implementation of the action/s clear  Rewards/sanctions for spending allocated resources on other programs | No |  |  |
| Human resources addressed | No |  |  |
| Organisational capacity addressed | No |  |  |
| Policy indicated strategies to mobilise required resources | No |  |  |
| Monitoring and Evaluation | Policy indicated monitoring and evaluation mechanisms to track progress on goals for child health | No |  |  |
| Policy nominated a committee or independent body to do evaluation | No |  |  |
| Outcome measures identified for each of the explicit and implicit objectives | No |  |  |
| Data for evaluation will be collected before, during, and after introduction of the new policy | No |  |  |
| Follow-up takes place after a sufficient period to allow the effects of policy change to become evident | No |  |  |
| Other factors that could have produced the change (other than policy) identified | No |  |  |
| Criteria for evaluation adequate or clear | No |  |  |
| Implementation | Multiple stakeholders involved in the design and implementation of the action/s | No |  |  |
| Obligations of the various implementers specified – who has to do what? | No |  |  |

Summary

| **Criteria** | **Quality** |
| --- | --- |
| Policy Background | Needs improvement |
| Goals | Weak |
| Resources | Weak |
| Monitoring and Evaluation | Weak |
| Implementation | Weak |

### **Paraguay** – Plan Nacional de Adaptación al Cambio Climático

|  | **Criteria** | **Criterion addressed?** | **Explanation** | **Quote** |
| --- | --- | --- | --- | --- |
| Policy Background | Children recognised as disproportionately affected by the impacts of climate change | No |  |  |
| Minimum of two context-specific climate-sensitive health risks for children identified | No |  |  |
| Source of background is explicit  Authority (one or more persons, books, scientific articles or sources of information)  Quantitative or qualitative analysis,  Deduction (premises that have been established from authority, observation, intuition or all three) | No |  |  |
| Goals | Goals for child health explicitly stated | No |  |  |
| Goals are concrete enough (quantitative where possible and qualitative where not) to be evaluated later | No |  |  |
| Goal is clear in its intent and in the mechanism with which to achieve the desired goals, yet does not attempt to prescribe in detail what the change must be | No |  |  |
| Action/s outlined to improve child health | Yes | School programs that implement gardens to improve food security for school children | “Develop school programs that implement agroecological gardens in educational centers for self sufficiency and improvement of food security for school children.” |
| Mechanisms by which children and/or pregnant women will be specifically targeted by the action are explicitly stated | Yes | Program is implemented in schools |  |
| Minimum of two actions | No |  |  |
| Actions comprehensively address climate-sensitive health risks identified in policy background | No |  |  |
| Resources | Financial resources addressed  Estimated financial resources for implementation of the action/s given  Allocated financial resources for implementation of the action/s clear  Rewards/sanctions for spending allocated resources on other programs | No |  |  |
| Human resources addressed | No |  |  |
| Organisational capacity addressed | No |  |  |
| Policy indicated strategies to mobilise required resources | No |  |  |
| Monitoring and Evaluation | Policy indicated monitoring and evaluation mechanisms to track progress on goals for child health | No |  |  |
| Policy nominated a committee or independent body to do evaluation | No |  |  |
| Outcome measures identified for each of the explicit and implicit objectives | No |  |  |
| Data for evaluation will be collected before, during, and after introduction of the new policy | No |  |  |
| Follow-up takes place after a sufficient period to allow the effects of policy change to become evident | No |  |  |
| Other factors that could have produced the change (other than policy) identified | No |  |  |
| Criteria for evaluation adequate or clear | No |  |  |
| Implementation | Multiple stakeholders involved in the design and implementation of the action/s | No |  |  |
| Obligations of the various implementers specified – who has to do what? | No |  |  |

Summary

| **Criteria** | **Quality** |
| --- | --- |
| Policy Background | Weak |
| Goals | Needs improvement |
| Resources | Weak |
| Monitoring and Evaluation | Weak |
| Implementation | Weak |

### **Peru** – Plan Nacional de Adaptación al Cambio Climático del Perú: un insumo para la actualización de la Estrategia Nacional ante al Cambio Climático

|  | **Criteria** | **Criterion addressed?** | **Explanation** | **Quote** |
| --- | --- | --- | --- | --- |
| Policy Background | Children recognised as disproportionately affected by the impacts of climate change | Yes | Children are described as a vulnerable group | “Women, children and adolescents… whose economic, social and cultural conditions diminish their capacity to adapt and mitigate climate change, so they are more exposed to the impacts and risks of climate change (RLMCC, 2019). |
| Minimum of two context-specific climate-sensitive health risks for children identified | Yes | Climate risks: respiratory illnesses; heat-related illnesses; extreme weather events; food- and water-borne diseases; malnutrition and food insecurity; effects on health care | “…effects on children and adults, health problems such as an increase in cases of pneumonia, incidence of acute respiratory infections and others.”  “Snowfall can also cause damage and losses in health and livelihoods, especially among vulnerable populations.”  “As for heat waves, these can produce in the population an increase in heat stroke, dehydration, exhaustion, low blood pressure, dizziness, and diarrheal and dermal diseases, especially dangerous for the nursing population, children…”  “[Potential indirect effects on children and adolescents include:] Impact of water stress on the health of children and adolescents. Increase in gastrointestinal and other diseases associated with lack of sanitation. Reduced capacity to overcome poverty conditions. Diseases and health problems due to hydrometeorological hazards.”  “Food insecurity, child malnutrition, and increased food insecurity, child undernutrition and diseases associated with it.”  “Decrease in life expectancy. Impairment of quality of life. Deterioration of health. Increased morbidity. Increased incidence of poverty and the difficulty of overcoming it. Economic pressure to acquire medicines and pay for treatments. Increased probability of suffering violence.” |
| Source of background is explicit  Authority (one or more persons, books, scientific articles or sources of information)  Quantitative or qualitative analysis,  Deduction (premises that have been established from authority, observation, intuition or all three) | Yes | Scientific articles, “own elaboration” |  |
| Goals | Goals for child health explicitly stated | Yes | Improve the adaptive capacity and increase access to health services, with consideration of children  Baseline, 2021, 2025 and 2030 targets have also been specified for the indicators (see [Monitoring and Evaluation]) | “By 2050, the adaptive capacity of vulnerable population groups (such as those engaged in agriculture, fishing, aquaculture, indigenous or native peoples, Afro-Peruvian people, pregnant women, children, the elderly, people who work outdoors and people with disabilities and/or medical conditions) will be increased, including their livelihoods in the face of the hazards associated with climate change, which are reflected in the monitoring indicators of the specific priority objectives (see section 4.1.4)”  “Increased access to the provision of health services considering the differentiated impacts on children, adolescents, adults and the elderly, the LGTBI population and women, through the establishment of care protocols.” |
| Goals are concrete enough (quantitative where possible and qualitative where not) to be evaluated later | Yes |  |  |
| Goal is clear in its intent and in the mechanism with which to achieve the desired goals, yet does not attempt to prescribe in detail what the change must be | Yes |  |  |
| Action/s outlined to improve child health | Yes | Communication strategies to improve “wellbeing”; too vague to be explicitly linked to health  Various actions for “vulnerable populations”, previously established to include children:  Generating information on vector-borne disease, food- and water-borne disease, extreme temperature exposure, and healthy practices; Development of vector-borne disease and food- and water-borne disease indicators; Improved health coverage and strengthened monitoring/communication system for emergency responses | “To make known, through concrete examples and stories of real people, the importance of adaptation to climate change as a priority element to ensure the wellbeing of our families, friends, community and country.”  “Vulnerable populations adopt healthy practices in the face of the increase in vector-borne diseases due to the effects of climate change… Generation of current and future epidemiological and sanitary information related to vectorborne diseases and zoonoses associated with climate change. - Generation of burden assessment studies and cost-effectiveness analysis of disease burden interventions. - Development of disease transmission risk indicators. - Among others”  “Vulnerable populations adopt healthy practices in the face of increased food- and waterborne diseases due to the effects of climate change... Generation of information on waterborne diseases and contaminated food in the context of climate change. - Generation of risk indicators of water transmission and contaminated food in a context of climate change according to the Regulation of Water Quality for Human Consumption - Supreme Decree No. 031-2010-SA. - Systematization of ancestral practices for food preservation. - Among others”  “Vulnerable populations adopt healthy practices in the face of exposure to extreme temperatures caused by the effects of climate change… Generation of information on scenarios and projections of extreme temperatures in public health in those prioritized vulnerable areas. - Among others.”  “Vulnerable population sensitized on healthy practices in the face of risks associated with climate change… Inter-institutional coordination for the dissemination of healthy practices with a gender and intercultural approach. - Generation of information on hazards and effects of climate change on public health, as well as adaptation measures for their reduction. - Access to sources of financing for the development of communication and dissemination actions. - Among others.”  “Health services improve access to coverage and care for the population vulnerable to the occurrence of hazards associated with climate change… Generation of tools for access to public and private financing mechanisms related to adaptation to climate change in health. - Strengthening the monitoring and communications system for emergency response to climate change-related hazards. - Among others.” |
| Mechanisms by which children and/or pregnant women will be specifically targeted by the action are explicitly stated | No | More detail is needed. |  |
| Minimum of two actions | Yes |  |  |
| Actions comprehensively address climate-sensitive health risks identified in policy background | Yes |  |  |
| Resources | Financial resources addressed  Estimated financial resources for implementation of the action/s given  Allocated financial resources for implementation of the action/s clear  Rewards/sanctions for spending allocated resources on other programs | No | Not specific for actions above |  |
| Human resources addressed | No |  |  |
| Organisational capacity addressed | No |  |  |
| Policy indicated strategies to mobilise required resources | No |  |  |
| Monitoring and Evaluation | Policy indicated monitoring and evaluation mechanisms to track progress on goals for child health | Yes | Monitoring and Evaluation plan is under development; proposed guidelines and indicators are provided. |  |
| Policy nominated a committee or independent body to do evaluation | No | Those responsible for the measures below are all listed as “to be defined” |  |
| Outcome measures identified for each of the explicit and implicit objectives | Yes | % of adaptation measures that include differentiated target groups, including children  No of families that develop healthy practices related to vector-borne diseases, food- and water-borne diseases, and extreme temperature exposure  No. of actions to disseminate information on healthy practices  No. of health services with financial mechanisms for vulnerable populations | “Percentage of adaptation measures that include specific activities with differentiated target groups (children, adolescents, youth, adults and senior citizens) to emphasize their role in the compliance with such measures and/or the application of a practice. of mainstreaming.”  “N.o of families that develop healthy practices; the increase in vector-borne diseases.”  “N.o of families that develop healthy practices; The increase in illnesses transmitted by contaminated food and water.”  “N.o of families that develop healthy practices; exposure to extreme temperatures.”  “N.o of information and dissemination actions on healthy practices.”  “N.o of health services that implement financial mechanisms to guarantee continuity of care to vulnerable population.” |
| Data for evaluation will be collected before, during, and after introduction of the new policy | Yes | Indicators measured annually. |  |
| Follow-up takes place after a sufficient period to allow the effects of policy change to become evident | Yes | Annually. |  |
| Other factors that could have produced the change (other than policy) identified | No |  |  |
| Criteria for evaluation adequate or clear | No | Indicators should directly measure health outcomes. |  |
| Implementation | Multiple stakeholders involved in the design and implementation of the action/s | Yes | Various state actors |  |
| Obligations of the various implementers specified – who has to do what? | No |  |  |

Summary

| **Criteria** | **Quality** |
| --- | --- |
| Policy Background | Strong |
| Goals | Needs improvement |
| Resources | Weak |
| Monitoring and Evaluation | Needs improvement |
| Implementation | Needs improvement |

### **Saint Kitts and Nevis** – The National Climate Change Adaptation Strategy for Saint Christopher and Nevis

|  | **Criteria** | **Criterion addressed?** | **Explanation** | **Quote** |
| --- | --- | --- | --- | --- |
| Policy Background | Children recognised as disproportionately affected by the impacts of climate change | No |  |  |
| Minimum of two context-specific climate-sensitive health risks for children identified | No |  |  |
| Source of background is explicit  Authority (one or more persons, books, scientific articles or sources of information)  Quantitative or qualitative analysis,  Deduction (premises that have been established from authority, observation, intuition or all three) | No |  |  |
| Goals | Goals for child health explicitly stated | No |  |  |
| Goals are concrete enough (quantitative where possible and qualitative where not) to be evaluated later | No |  |  |
| Goal is clear in its intent and in the mechanism with which to achieve the desired goals, yet does not attempt to prescribe in detail what the change must be |  |  |  |
| Action/s outlined to improve child health | No |  |  |
| Mechanisms by which children and/or pregnant women will be specifically targeted by the action are explicitly stated | No |  |  |
| Minimum of two actions | No |  |  |
| Actions comprehensively address climate-sensitive health risks identified in policy background | No |  |  |
| Resources | Financial resources addressed  Estimated financial resources for implementation of the action/s given  Allocated financial resources for implementation of the action/s clear  Rewards/sanctions for spending allocated resources on other programs | No |  |  |
| Human resources addressed | No |  |  |
| Organisational capacity addressed | No |  |  |
| Policy indicated strategies to mobilise required resources | No |  |  |
| Monitoring and Evaluation | Policy indicated monitoring and evaluation mechanisms to track progress on goals for child health | No |  |  |
| Policy nominated a committee or independent body to do evaluation | No |  |  |
| Outcome measures identified for each of the explicit and implicit objectives | No |  |  |
| Data for evaluation will be collected before, during, and after introduction of the new policy | No |  |  |
| Follow-up takes place after a sufficient period to allow the effects of policy change to become evident | No |  |  |
| Other factors that could have produced the change (other than policy) identified | No |  |  |
| Criteria for evaluation adequate or clear | No |  |  |
| Implementation | Multiple stakeholders involved in the design and implementation of the action/s | No |  |  |
| Obligations of the various implementers specified – who has to do what? | No |  |  |

Summary

| **Criteria** | **Quality** |
| --- | --- |
| Policy Background | Weak |
| Goals | Weak |
| Resources | Weak |
| Monitoring and Evaluation | Weak |
| Implementation | Weak |

### **Saint Lucia** – Saint Lucia’s National Adaptation Plan 2018-2028

|  | **Criteria** | **Criterion addressed?** | **Explanation** | **Quote** |
| --- | --- | --- | --- | --- |
| Policy Background | Children recognised as disproportionately affected by the impacts of climate change | No |  |  |
| Minimum of two context-specific climate-sensitive health risks for children identified | No |  |  |
| Source of background is explicit  Authority (one or more persons, books, scientific articles or sources of information)  Quantitative or qualitative analysis,  Deduction (premises that have been established from authority, observation, intuition or all three) | No |  |  |
| Goals | Goals for child health explicitly stated | No |  |  |
| Goals are concrete enough (quantitative where possible and qualitative where not) to be evaluated later | No | No explicit goals for child health |  |
| Goal is clear in its intent and in the mechanism with which to achieve the desired goals, yet does not attempt to prescribe in detail what the change must be | No |  |  |
| Action/s outlined to improve child health | Yes | Education on health risks, tailored for specific group needs (including children).  Creating climate resilient school infrastructure, particularly in schools that double as emergency shelters. However, no explicit link to child health was made.  Enacting legislation in the health sector for the protection of vulnerable groups  Heat event response plan includes guidelines for school attendance. Exact guidelines have not been stated. No link to child health outcomes was made. | “Integrate into/enhance in, climate education materials, modules on hazards, impacts and risk reduction and management options, e.g. health risks (vector-borne disease, heat, injuries)”  “New materials, tailored for specific group needs (e.g. … young children…) proposed and developed and modules on climate risks integrated as part of the Climate Change Education Strategy”  “Enact legislation for the protection of vulnerable groups, including the young and elderly”  “Heat event response plan set up and including… e) guidelines for school attendance” |
| Mechanisms by which children and/or pregnant women will be specifically targeted by the action are explicitly stated | No | Educational materials will be tailored for young children, but it is unclear how and where this will be implemented into climate education materials  No details were given on the legislation that will be enacted to protect children.  Actions to create resilient school infrastructure and implement school attendance guidelines during heat events specifically target school students. |  |
| Minimum of two actions | Yes |  |  |
| Actions comprehensively address climate-sensitive health risks identified in policy background | No |  |  |
| Resources | Financial resources addressed  Estimated financial resources for implementation of the action/s given  Allocated financial resources for implementation of the action/s clear  Rewards/sanctions for spending allocated resources on other programs | No |  |  |
| Human resources addressed | No |  |  |
| Organisational capacity addressed | No |  |  |
| Policy indicated strategies to mobilise required resources | No |  |  |
| Monitoring and Evaluation | Policy indicated monitoring and evaluation mechanisms to track progress on goals for child health | No |  |  |
| Policy nominated a committee or independent body to do evaluation | No |  |  |
| Outcome measures identified for each of the explicit and implicit objectives | No |  |  |
| Data for evaluation will be collected before, during, and after introduction of the new policy | No |  |  |
| Follow-up takes place after a sufficient period to allow the effects of policy change to become evident | No |  |  |
| Other factors that could have produced the change (other than policy) identified | No |  |  |
| Criteria for evaluation adequate or clear | No |  |  |
| Implementation | Multiple stakeholders involved in the design and implementation of the action/s | No | Stakeholders for child health actions have not been specified |  |
| Obligations of the various implementers specified – who has to do what? | No |  |  |

Summary

| **Criteria** | **Quality** |
| --- | --- |
| Policy Background | Needs improvement |
| Goals | Needs improvement |
| Resources | Weak |
| Monitoring and Evaluation | Weak |
| Implementation | Weak |

### **Saint Vincent and the Grenadines** – National Adaptation Plan for St. Vincent and the Grenadines

|  | **Criteria** | **Criterion addressed?** | **Explanation** | **Quote** |
| --- | --- | --- | --- | --- |
| Policy Background | Children recognised as disproportionately affected by the impacts of climate change | No |  |  |
| Minimum of two context-specific climate-sensitive health risks for children identified | No |  |  |
| Source of background is explicit  Authority (one or more persons, books, scientific articles or sources of information)  Quantitative or qualitative analysis,  Deduction (premises that have been established from authority, observation, intuition or all three) | No |  |  |
| Goals | Specific Goals for child health explicitly stated | No |  |  |
| Goals are concrete enough (quantitative where possible and qualitative where not) to be evaluated later | No |  |  |
| Goal is clear in its intent and in the mechanism with which to achieve the desired goals, yet does not attempt to prescribe in detail what the change must be | No |  |  |
| Action/s outlined to improve child health | No |  |  |
| Mechanisms by which children and/or pregnant women will be specifically targeted by the action are explicitly stated | No |  |  |
| Minimum of two actions | No |  |  |
| Actions comprehensively address climate-sensitive health risks identified in policy background | No |  |  |
| Resources | Financial resources addressed  Estimated financial resources for implementation of the action/s given  Allocated financial resources for implementation of the action/s clear  Rewards/sanctions for spending allocated resources on other programs | No |  |  |
| Human resources addressed | No |  |  |
| Organisational capacity addressed | No |  |  |
| Policy indicated strategies to mobilise required resources | No |  |  |
| Monitoring and Evaluation | Policy indicated monitoring and evaluation mechanisms to track progress on goals for child health | No |  |  |
| Policy nominated a committee or independent body to do evaluation | No |  |  |
| Outcome measures identified for each of the explicit and implicit objectives | No |  |  |
| Data for evaluation will be collected before, during, and after introduction of the new policy | No |  |  |
| Follow-up takes place after a sufficient period to allow the effects of policy change to become evident | No |  |  |
| Other factors that could have produced the change (other than policy) identified | No |  |  |
| Criteria for evaluation adequate or clear | No |  |  |
| Implementation | Multiple stakeholders involved in the design and implementation of the action/s | No |  |  |
| Obligations of the various implementers specified – who has to do what? | No |  |  |

Summary

| **Criteria** | **Quality** |
| --- | --- |
| Policy Background | Weak |
| Goals | Weak |
| Resources | Weak |
| Monitoring and Evaluation | Weak |
| Implementation | Weak |

### **Suriname** - Suriname National Adaptation Plan 2019-2029

|  | **Criteria** | **Criterion addressed?** | **Explanation** | **Quote** |
| --- | --- | --- | --- | --- |
| Policy Background | Children recognised as disproportionately affected by the impacts of climate change | No |  |  |
| Minimum of two context-specific climate-sensitive health risks for children identified | No | Climate risk areas identified: extreme weather events | “…women have responsibility for small children who cannot swim or outrun disasters, who are further negatively impacted by climate change.” |
| Source of background is explicit  Authority (one or more persons, books, scientific articles or sources of information)  Quantitative or qualitative analysis,  Deduction (premises that have been established from authority, observation, intuition or all three) | No | The statement appears to be based on opinion |  |
| Goals | Goals for child health explicitly stated | No |  |  |
| Goals are concrete enough (quantitative where possible and qualitative where not) to be evaluated later | No |  |  |
| Goal is clear in its intent and in the mechanism with which to achieve the desired goals, yet does not attempt to prescribe in detail what the change must be | No |  |  |
| Action/s outlined to improve child health | No |  |  |
| Mechanisms by which children and/or pregnant women will be specifically targeted by the action are explicitly stated | No |  |  |
| Minimum of two actions | No |  |  |
| Actions comprehensively address climate-sensitive health risks identified in policy background | No |  |  |
| Resources | Financial resources addressed  Estimated financial resources for implementation of the action/s given  Allocated financial resources for implementation of the action/s clear  Rewards/sanctions for spending allocated resources on other programs | No |  |  |
| Human resources addressed | No |  |  |
| Organisational capacity addressed | No |  |  |
| Policy indicated strategies to mobilise required resources | No |  |  |
| Monitoring and Evaluation | Policy indicated monitoring and evaluation mechanisms to track progress on goals for child health | No |  |  |
| Policy nominated a committee or independent body to do evaluation | No |  |  |
| Outcome measures identified for each of the explicit and implicit objectives | No |  |  |
| Data for evaluation will be collected before, during, and after introduction of the new policy | No |  |  |
| Follow-up takes place after a sufficient period to allow the effects of policy change to become evident | No |  |  |
| Other factors that could have produced the change (other than policy) identified | No |  |  |
| Criteria for evaluation adequate or clear | No |  |  |
| Implementation | Multiple stakeholders involved in the design and implementation of the action/s | No |  |  |
| Obligations of the various implementers specified – who has to do what? | No |  |  |

Summary

| **Criteria** | **Quality** |
| --- | --- |
| Policy Background | Weak |
| Goals | Weak |
| Resources | Weak |
| Monitoring and Evaluation | Weak |
| Implementation | Weak |

### **Trinidad and Tobago** – National Adaptation Plan for the Republic of Trinidad and Tobago

|  | **Criteria** | **Criterion addressed?** | **Explanation** | **Quote** |
| --- | --- | --- | --- | --- |
| Policy Background | Children recognised as disproportionately affected by the impacts of climate change | No |  |  |
| Minimum of two context-specific climate-sensitive health risks for children identified | No | Climate risk areas identified: heat-related illnesses | “It was found that in years with early warmer periods epidemics appeared to occur early. Direct effects include increased deaths/injuries from heatwaves among the elderly/infirmed, the young, and outdoor workers” |
| Source of background is explicit  Authority (one or more persons, books, scientific articles or sources of information)  Quantitative or qualitative analysis,  Deduction (premises that have been established from authority, observation, intuition or all three) | No | The above statement was drawn from observations from earlier years. The exact source is unclear. |  |
| Goals | Goals for child health explicitly stated | No |  |  |
| Goals are concrete enough (quantitative where possible and qualitative where not) to be evaluated later | No |  |  |
| Goal is clear in its intent and in the mechanism with which to achieve the desired goals, yet does not attempt to prescribe in detail what the change must be | No |  |  |
| Action/s outlined to improve child health | No |  |  |
| Mechanisms by which children and/or pregnant women will be specifically targeted by the action are explicitly stated | No |  |  |
| Minimum of two actions | No |  |  |
| Actions comprehensively address climate-sensitive health risks identified in policy background | No |  |  |
| Resources | Financial resources addressed  Estimated financial resources for implementation of the action/s given  Allocated financial resources for implementation of the action/s clear  Rewards/sanctions for spending allocated resources on other programs | No |  |  |
| Human resources addressed | No |  |  |
| Organisational capacity addressed | No |  |  |
| Policy indicated strategies to mobilise required resources | No |  |  |
| Monitoring and Evaluation | Policy indicated monitoring and evaluation mechanisms to track progress on goals for child health | No |  |  |
| Policy nominated a committee or independent body to do evaluation | No |  |  |
| Outcome measures identified for each of the explicit and implicit objectives | No |  |  |
| Data for evaluation will be collected before, during, and after introduction of the new policy | No |  |  |
| Follow-up takes place after a sufficient period to allow the effects of policy change to become evident | No |  |  |
| Other factors that could have produced the change (other than policy) identified | No |  |  |
| Criteria for evaluation adequate or clear | No |  |  |
| Implementation | Multiple stakeholders involved in the design and implementation of the action/s | No |  |  |
| Obligations of the various implementers specified – who has to do what? | No |  |  |

Summary

| **Criteria** | **Quality** |
| --- | --- |
| Policy Background | Weak |
| Goals | Weak |
| Resources | Weak |
| Monitoring and Evaluation | Weak |
| Implementation | Weak |

### **United States of America** – Department of Health and Human Services 2021 Climate Action Plan

|  | **Criteria** | **Criterion addressed?** | **Explanation** | **Quote** |
| --- | --- | --- | --- | --- |
| Policy Background | Children recognised as disproportionately affected by the impacts of climate change | Yes |  | “Although the climate crisis affects everyone, those most susceptible include… children, pregnant persons…” |
| Minimum of two context-specific climate-sensitive health risks for children identified | No |  |  |
| Source of background is explicit  Authority (one or more persons, books, scientific articles or sources of information)  Quantitative or qualitative analysis,  Deduction (premises that have been established from authority, observation, intuition or all three) | No |  |  |
| Goals | Goals for child health explicitly stated | No |  |  |
| Goals are concrete enough (quantitative where possible and qualitative where not) to be evaluated later | No |  |  |
| Goal is clear in its intent and in the mechanism with which to achieve the desired goals, yet does not attempt to prescribe in detail what the change must be | No |  |  |
| Action/s outlined to improve child health | No |  |  |
| Mechanisms by which children and/or pregnant women will be specifically targeted by the action are explicitly stated | No |  |  |
| Minimum of two actions | No |  |  |
| Actions comprehensively address climate-sensitive health risks identified in policy background | No |  |  |
| Resources | Financial resources addressed  Estimated financial resources for implementation of the action/s given  Allocated financial resources for implementation of the action/s clear  Rewards/sanctions for spending allocated resources on other programs | No |  |  |
| Human resources addressed | No |  |  |
| Organisational capacity addressed | No |  |  |
| Policy indicated strategies to mobilise required resources | No |  |  |
| Monitoring and Evaluation | Policy indicated monitoring and evaluation mechanisms to track progress on goals for child health | No |  |  |
| Policy nominated a committee or independent body to do evaluation | No |  |  |
| Outcome measures identified for each of the explicit and implicit objectives | No |  |  |
| Data for evaluation will be collected before, during, and after introduction of the new policy | No |  |  |
| Follow-up takes place after a sufficient period to allow the effects of policy change to become evident | No |  |  |
| Other factors that could have produced the change (other than policy) identified | No |  |  |
| Criteria for evaluation adequate or clear | No |  |  |
| Implementation | Multiple stakeholders involved in the design and implementation of the action/s | No |  |  |
| Obligations of the various implementers specified – who has to do what? | No |  |  |

Summary

| **Criteria** | **Quality** |
| --- | --- |
| Policy Background | Needs improvement |
| Goals | Weak |
| Resources | Weak |
| Monitoring and Evaluation | Weak |
| Implementation | Weak |

### **Uruguay** – Política Nacional de Cambio Climático

|  | **Criteria** | **Criterion addressed?** | **Explanation** | **Quote** |
| --- | --- | --- | --- | --- |
| Policy Background | Children recognised as disproportionately affected by the impacts of climate change | No |  |  |
| Minimum of two context-specific climate-sensitive health risks for children identified | No |  |  |
| Source of background is explicit  Authority (one or more persons, books, scientific articles or sources of information)  Quantitative or qualitative analysis,  Deduction (premises that have been established from authority, observation, intuition or all three) | No |  |  |
| Goals | Goals for child health explicitly stated | No |  |  |
| Goals are concrete enough (quantitative where possible and qualitative where not) to be evaluated later | No |  |  |
| Goal is clear in its intent and in the mechanism with which to achieve the desired goals, yet does not attempt to prescribe in detail what the change must be | No |  |  |
| Action/s outlined to improve child health | No | “Promote the adaptive capacity and resilience of the population through actions aimed at children…” is provided, but it is unclear if this relates to health. |  |
| Mechanisms by which children and/or pregnant women will be specifically targeted by the action are explicitly stated | No |  |  |
| Minimum of two actions | No |  |  |
| Actions comprehensively address climate-sensitive health risks identified in policy background | No |  |  |
| Resources | Financial resources addressed  Estimated financial resources for implementation of the action/s given  Allocated financial resources for implementation of the action/s clear  Rewards/sanctions for spending allocated resources on other programs | No |  |  |
| Human resources addressed | No |  |  |
| Organisational capacity addressed | No |  |  |
| Policy indicated strategies to mobilise required resources | No |  |  |
| Monitoring and Evaluation | Policy indicated monitoring and evaluation mechanisms to track progress on goals for child health | No |  |  |
| Policy nominated a committee or independent body to do evaluation | No |  |  |
| Outcome measures identified for each of the explicit and implicit objectives | No |  |  |
| Data for evaluation will be collected before, during, and after introduction of the new policy | No |  |  |
| Follow-up takes place after a sufficient period to allow the effects of policy change to become evident | No |  |  |
| Other factors that could have produced the change (other than policy) identified | No |  |  |
| Criteria for evaluation adequate or clear | No |  |  |
| Implementation | Multiple stakeholders involved in the design and implementation of the action/s | No |  |  |
| Obligations of the various implementers specified – who has to do what? | No |  |  |

Summary

| **Criteria** | **Quality** |
| --- | --- |
| Policy Background | Weak |
| Goals | Weak |
| Resources | Weak |
| Monitoring and Evaluation | Weak |
| Implementation | Weak |

### **Venezuela** (**Bolivarian** **Republic** **of**) – Actualización de la Contribución Nacionalmente Determinada de la República Bolivariana de Venezeula para la lucha contra el Cambio Climático y sus efectos

|  | **Criteria** | **Criterion addressed?** | **Explanation** | **Quote** |
| --- | --- | --- | --- | --- |
| Policy Background | Children recognised as disproportionately affected by the impacts of climate change | No |  |  |
| Minimum of two context-specific climate-sensitive health risks for children identified | No |  |  |
| Source of background is explicit  Authority (one or more persons, books, scientific articles or sources of information)  Quantitative or qualitative analysis,  Deduction (premises that have been established from authority, observation, intuition or all three) | No |  |  |
| Goals | Goals for child health explicitly stated | No |  |  |
| Goals are concrete enough (quantitative where possible and qualitative where not) to be evaluated later | No |  |  |
| Goal is clear in its intent and in the mechanism with which to achieve the desired goals, yet does not attempt to prescribe in detail what the change must be | No |  |  |
| Action/s outlined to improve child health | No |  |  |
| Mechanisms by which children and/or pregnant women will be specifically targeted by the action are explicitly stated | No |  |  |
| Minimum of two actions | No |  |  |
| Actions comprehensively address climate-sensitive health risks identified in policy background | No |  |  |
| Resources | Financial resources addressed  Estimated financial resources for implementation of the action/s given  Allocated financial resources for implementation of the action/s clear  Rewards/sanctions for spending allocated resources on other programs | No |  |  |
| Human resources addressed | No |  |  |
| Organisational capacity addressed | No |  |  |
| Policy indicated strategies to mobilise required resources | No |  |  |
| Monitoring and Evaluation | Policy indicated monitoring and evaluation mechanisms to track progress on goals for child health | No |  |  |
| Policy nominated a committee or independent body to do evaluation | No |  |  |
| Outcome measures identified for each of the explicit and implicit objectives | No |  |  |
| Data for evaluation will be collected before, during, and after introduction of the new policy | No |  |  |
| Follow-up takes place after a sufficient period to allow the effects of policy change to become evident | No |  |  |
| Other factors that could have produced the change (other than policy) identified | No |  |  |
| Criteria for evaluation adequate or clear | No |  |  |
| Implementation | Multiple stakeholders involved in the design and implementation of the action/s | No |  |  |
| Obligations of the various implementers specified – who has to do what? | No |  |  |

Summary

| **Criteria** | **Quality** |
| --- | --- |
| Policy Background | Weak |
| Goals | Weak |
| Resources | Weak |
| Monitoring and Evaluation | Weak |
| Implementation | Weak |

## **EASTERN MEDITERRANEAN REGION**

### **Afghanistan** – Climate Change and Governance in Afghanistan

|  | **Criteria** | **Criterion addressed?** | **Explanation** | **Quote** |
| --- | --- | --- | --- | --- |
| Policy Background | Children recognised as disproportionately affected by the impacts of climate change | Yes | Children are described as a vulnerable population |  |
| Minimum of two context-specific climate-sensitive health risks for children identified | No | Climate risk areas: heat-related illnesses | “In particular, heat waves in urban areas will present health risks for vulnerable populations (children, elderly, sick, etc.)” |
| Source of background is explicit  Authority (one or more persons, books, scientific articles or sources of information)  Quantitative or qualitative analysis,  Deduction (premises that have been established from authority, observation, intuition or all three) | No |  |  |
| Goals | Goals for child health explicitly stated | No |  |  |
| Goals are concrete enough (quantitative where possible and qualitative where not) to be evaluated later | No |  |  |
| Goal is clear in its intent and in the mechanism with which to achieve the desired goals, yet does not attempt to prescribe in detail what the change must be | No |  |  |
| Action/s outlined to improve child health | No |  |  |
| Mechanisms by which children and/or pregnant women will be specifically targeted by the action are explicitly stated | No |  |  |
| Minimum of two actions | No |  |  |
| Actions comprehensively address climate-sensitive health risks identified in policy background | No |  |  |
| Resources | Financial resources addressed  Estimated financial resources for implementation of the action/s given  Allocated financial resources for implementation of the action/s clear  Rewards/sanctions for spending allocated resources on other programs | No |  |  |
| Human resources addressed | No |  |  |
| Organisational capacity addressed | No |  |  |
| Policy indicated strategies to mobilise required resources | No |  |  |
| Monitoring and Evaluation | Policy indicated monitoring and evaluation mechanisms to track progress on goals for child health | No |  |  |
| Policy nominated a committee or independent body to do evaluation | No |  |  |
| Outcome measures identified for each of the explicit and implicit objectives | No |  |  |
| Data for evaluation will be collected before, during, and after introduction of the new policy | No |  |  |
| Follow-up takes place after a sufficient period to allow the effects of policy change to become evident | No |  |  |
| Other factors that could have produced the change (other than policy) identified | No |  |  |
| Criteria for evaluation adequate or clear | No |  |  |
| Implementation | Multiple stakeholders involved in the design and implementation of the action/s | No |  |  |
| Obligations of the various implementers specified – who has to do what? | No |  |  |

Summary

| **Criteria** | **Quality** |
| --- | --- |
| Policy Background | Needs improvement |
| Goals | Weak |
| Resources | Weak |
| Monitoring and Evaluation | Weak |
| Implementation | Weak |

### **Bahrain** – Nationally Determined Contribution of Kingdom of Bahrain under UNFCCC

|  | **Criteria** | **Criterion addressed?** | **Explanation** | **Quote** |
| --- | --- | --- | --- | --- |
| Policy Background | Children recognised as disproportionately affected by the impacts of climate change | No |  |  |
| Minimum of two context-specific climate-sensitive health risks for children identified | No |  |  |
| Source of background is explicit  Authority (one or more persons, books, scientific articles or sources of information)  Quantitative or qualitative analysis,  Deduction (premises that have been established from authority, observation, intuition or all three) | No |  |  |
| Goals | Goals for child health explicitly stated | No |  |  |
| Goals are concrete enough (quantitative where possible and qualitative where not) to be evaluated later | No |  |  |
| Goal is clear in its intent and in the mechanism with which to achieve the desired goals, yet does not attempt to prescribe in detail what the change must be | No |  |  |
| Action/s outlined to improve child health | No |  |  |
| Mechanisms by which children and/or pregnant women will be specifically targeted by the action are explicitly stated | No |  |  |
| Minimum of two actions | No |  |  |
| Actions comprehensively address climate-sensitive health risks identified in policy background | No |  |  |
| Resources | Financial resources addressed  Estimated financial resources for implementation of the action/s given  Allocated financial resources for implementation of the action/s clear  Rewards/sanctions for spending allocated resources on other programs | No |  |  |
| Human resources addressed | No |  |  |
| Organisational capacity addressed | No |  |  |
| Policy indicated strategies to mobilise required resources | No |  |  |
| Monitoring and Evaluation | Policy indicated monitoring and evaluation mechanisms to track progress on goals for child health | No |  |  |
| Policy nominated a committee or independent body to do evaluation | No |  |  |
| Outcome measures identified for each of the explicit and implicit objectives | No |  |  |
| Data for evaluation will be collected before, during, and after introduction of the new policy | No |  |  |
| Follow-up takes place after a sufficient period to allow the effects of policy change to become evident | No |  |  |
| Other factors that could have produced the change (other than policy) identified | No |  |  |
| Criteria for evaluation adequate or clear | No |  |  |
| Implementation | Multiple stakeholders involved in the design and implementation of the action/s | No |  |  |
| Obligations of the various implementers specified – who has to do what? | No |  |  |

Summary

| **Criteria** | **Quality** |
| --- | --- |
| Policy Background | Weak |
| Goals | Weak |
| Resources | Weak |
| Monitoring and Evaluation | Weak |
| Implementation | Weak |

### **Djibouti** – Contribution Prévue Déterminée au niveau National de la République de Djibouti

|  | **Criteria** | **Criterion addressed?** | **Explanation** | **Quote** |
| --- | --- | --- | --- | --- |
| Policy Background | Children recognised as disproportionately affected by the impacts of climate change | No | No mention of children in the policy |  |
| Minimum of two context-specific climate-sensitive health risks for children identified | No |  |  |
| Source of background is explicit  Authority (one or more persons, books, scientific articles or sources of information)  Quantitative or qualitative analysis,  Deduction (premises that have been established from authority, observation, intuition or all three) | No |  |  |
| Goals | Goals for child health explicitly stated | No |  |  |
| Goals are concrete enough (quantitative where possible and qualitative where not) to be evaluated later | No |  |  |
| Goal is clear in its intent and in the mechanism with which to achieve the desired goals, yet does not attempt to prescribe in detail what the change must be | No |  |  |
| Action/s outlined to improve child health | No |  |  |
| Mechanisms by which children and/or pregnant women will be specifically targeted by the action are explicitly stated | No |  |  |
| Minimum of two actions | No |  |  |
| Actions comprehensively address climate-sensitive health risks identified in policy background | No |  |  |
| Resources | Financial resources addressed  Estimated financial resources for implementation of the action/s given  Allocated financial resources for implementation of the action/s clear  Rewards/sanctions for spending allocated resources on other programs | No |  |  |
| Human resources addressed | No |  |  |
| Organisational capacity addressed | No |  |  |
| Policy indicated strategies to mobilise required resources | No |  |  |
| Monitoring and Evaluation | Policy indicated monitoring and evaluation mechanisms to track progress on goals for child health | No |  |  |
| Policy nominated a committee or independent body to do evaluation | No |  |  |
| Outcome measures identified for each of the explicit and implicit objectives | No |  |  |
| Data for evaluation will be collected before, during, and after introduction of the new policy | No |  |  |
| Follow-up takes place after a sufficient period to allow the effects of policy change to become evident | No |  |  |
| Other factors that could have produced the change (other than policy) identified | No |  |  |
| Criteria for evaluation adequate or clear | No |  |  |
| Implementation | Multiple stakeholders involved in the design and implementation of the action/s | No |  |  |
| Obligations of the various implementers specified – who has to do what? | No |  |  |

Summary

| **Criteria** | **Quality** |
| --- | --- |
| Policy Background | Weak |
| Goals | Weak |
| Resources | Weak |
| Monitoring and Evaluation | Weak |
| Implementation | Weak |

### **Egypt** – Egypt National Climate Change Strategy 2050

|  | **Criteria** | **Criterion addressed?** | **Explanation** | **Quote** |
| --- | --- | --- | --- | --- |
| Policy Background | Children recognised as disproportionately affected by the impacts of climate change | Yes |  | “Directing special attention to citizens with special risk factors, such as women, especially pregnant and lactating women, children…” |
| Minimum of two context-specific climate-sensitive health risks for children identified | No |  |  |
| Source of background is explicit  Authority (one or more persons, books, scientific articles or sources of information)  Quantitative or qualitative analysis,  Deduction (premises that have been established from authority, observation, intuition or all three) | No |  |  |
| Goals | Goals for child health explicitly stated | No |  |  |
| Goals are concrete enough (quantitative where possible and qualitative where not) to be evaluated later | No |  |  |
| Goal is clear in its intent and in the mechanism with which to achieve the desired goals, yet does not attempt to prescribe in detail what the change must be | No |  |  |
| Action/s outlined to improve child health | Yes | Increasing awareness of health risks and providing nutrition sources, with a focus on women and children | “Awareness of citizens about the health risks posed by climate change, with a focus on the most vulnerable groups, such as women and children”  “Providing sources of proper nutrition in the poorest areas with a focus on vulnerable groups, such as women, especially pregnant and lactating women, children…” |
| Mechanisms by which children and/or pregnant women will be specifically targeted by the action are explicitly stated | No |  |  |
| Minimum of two actions | Yes |  |  |
| Actions comprehensively address climate-sensitive health risks identified in policy background | No |  |  |
| Resources | Financial resources addressed  Estimated financial resources for implementation of the action/s given  Allocated financial resources for implementation of the action/s clear  Rewards/sanctions for spending allocated resources on other programs | No |  |  |
| Human resources addressed | No |  |  |
| Organisational capacity addressed | No |  |  |
| Policy indicated strategies to mobilise required resources | No |  |  |
| Monitoring and Evaluation | Policy indicated monitoring and evaluation mechanisms to track progress on goals for child health | No |  |  |
| Policy nominated a committee or independent body to do evaluation | No |  |  |
| Outcome measures identified for each of the explicit and implicit objectives | No | Some indicators that may be relevant have been provided; unclear as to which specific actions they have been ascribed to | “Number of educational seminars on climate change its impact on health”  “Number of infrastructure development projects related to education, digital transformation and distance education technologies” |
| Data for evaluation will be collected before, during, and after introduction of the new policy | No |  |  |
| Follow-up takes place after a sufficient period to allow the effects of policy change to become evident | No |  |  |
| Other factors that could have produced the change (other than policy) identified | No |  |  |
| Criteria for evaluation adequate or clear | No |  |  |
| Implementation | Multiple stakeholders involved in the design and implementation of the action/s | No | Stakeholders involved in child health actions above are unclear |  |
| Obligations of the various implementers specified – who has to do what? | No |  |  |

Summary

| **Criteria** | **Quality** |
| --- | --- |
| Policy Background | Needs improvement |
| Goals | Needs improvement |
| Resources | Weak |
| Monitoring and Evaluation | Weak |
| Implementation | Weak |

### **Iran (Islamic Republic of)** – National Strategic Plan on Climate Change

|  | **Criteria** | **Criterion addressed?** | **Explanation** | **Quote** |
| --- | --- | --- | --- | --- |
| Policy Background | Children recognised as disproportionately affected by the impacts of climate change | No |  |  |
| Minimum of two context-specific climate-sensitive health risks for children identified | No |  |  |
| Source of background is explicit  Authority (one or more persons, books, scientific articles or sources of information)  Quantitative or qualitative analysis,  Deduction (premises that have been established from authority, observation, intuition or all three) | No |  |  |
| Goals | Goals for child health explicitly stated | No |  |  |
| Goals are concrete enough (quantitative where possible and qualitative where not) to be evaluated later | No |  |  |
| Goal is clear in its intent and in the mechanism with which to achieve the desired goals, yet does not attempt to prescribe in detail what the change must be | No |  |  |
| Action/s outlined to improve child health | No | “Improving and promoting education programs in schools in order to improve the level of public knowledge about the effects of climate change” is provided; unclear whether this includes health information |  |
| Mechanisms by which children and/or pregnant women will be specifically targeted by the action are explicitly stated | No |  |  |
| Minimum of two actions | No |  |  |
| Actions comprehensively address climate-sensitive health risks identified in policy background | No |  |  |
| Resources | Financial resources addressed  Estimated financial resources for implementation of the action/s given  Allocated financial resources for implementation of the action/s clear  Rewards/sanctions for spending allocated resources on other programs | No |  |  |
| Human resources addressed | No |  |  |
| Organisational capacity addressed | No |  |  |
| Policy indicated strategies to mobilise required resources | No |  |  |
| Monitoring and Evaluation | Policy indicated monitoring and evaluation mechanisms to track progress on goals for child health | No |  |  |
| Policy nominated a committee or independent body to do evaluation | No |  |  |
| Outcome measures identified for each of the explicit and implicit objectives | No |  |  |
| Data for evaluation will be collected before, during, and after introduction of the new policy | No |  |  |
| Follow-up takes place after a sufficient period to allow the effects of policy change to become evident | No |  |  |
| Other factors that could have produced the change (other than policy) identified | No |  |  |
| Criteria for evaluation adequate or clear | No |  |  |
| Implementation | Multiple stakeholders involved in the design and implementation of the action/s | No |  |  |
| Obligations of the various implementers specified – who has to do what? | No |  |  |

Summary

| **Criteria** | **Quality** |
| --- | --- |
| Policy Background | Weak |
| Goals | Weak |
| Resources | Weak |
| Monitoring and Evaluation | Weak |
| Implementation | Weak |

### **Iraq** – Nationally Determined Contributions of Iraq

|  | **Criteria** | **Criterion addressed?** | **Explanation** | **Quote** |
| --- | --- | --- | --- | --- |
| Policy Background | Children recognised as disproportionately affected by the impacts of climate change | No |  |  |
| Minimum of two context-specific climate-sensitive health risks for children identified | No |  |  |
| Source of background is explicit  Authority (one or more persons, books, scientific articles or sources of information)  Quantitative or qualitative analysis,  Deduction (premises that have been established from authority, observation, intuition or all three) | No |  |  |
| Goals | Goals for child health explicitly stated | No |  |  |
| Goals are concrete enough (quantitative where possible and qualitative where not) to be evaluated later | No |  |  |
| Goal is clear in its intent and in the mechanism with which to achieve the desired goals, yet does not attempt to prescribe in detail what the change must be | No |  |  |
| Action/s outlined to improve child health | No |  |  |
| Mechanisms by which children and/or pregnant women will be specifically targeted by the action are explicitly stated | No |  |  |
| Minimum of two actions | No |  |  |
| Actions comprehensively address climate-sensitive health risks identified in policy background | No |  |  |
| Resources | Financial resources addressed  Estimated financial resources for implementation of the action/s given  Allocated financial resources for implementation of the action/s clear  Rewards/sanctions for spending allocated resources on other programs | No |  |  |
| Human resources addressed | No |  |  |
| Organisational capacity addressed | No |  |  |
| Policy indicated strategies to mobilise required resources | No |  |  |
| Monitoring and Evaluation | Policy indicated monitoring and evaluation mechanisms to track progress on goals for child health | No |  |  |
| Policy nominated a committee or independent body to do evaluation | No |  |  |
| Outcome measures identified for each of the explicit and implicit objectives | No |  |  |
| Data for evaluation will be collected before, during, and after introduction of the new policy | No |  |  |
| Follow-up takes place after a sufficient period to allow the effects of policy change to become evident | No |  |  |
| Other factors that could have produced the change (other than policy) identified | No |  |  |
| Criteria for evaluation adequate or clear | No |  |  |
| Implementation | Multiple stakeholders involved in the design and implementation of the action/s | No |  |  |
| Obligations of the various implementers specified – who has to do what? | No |  |  |

Summary

| **Criteria** | **Quality** |
| --- | --- |
| Policy Background | Weak |
| Goals | Weak |
| Resources | Weak |
| Monitoring and Evaluation | Weak |
| Implementation | Weak |

### **Jordan** – National Climate Change Adaptation Plan of Jordan

|  | **Criteria** | **Criterion addressed?** | **Explanation** | **Quote** |
| --- | --- | --- | --- | --- |
| Policy Background | Children recognised as disproportionately affected by the impacts of climate change | Yes | Children are described as a vulnerable group | “Mainstream gender, children and young people and other vulnerable groups… considerations, to increase their adaptive capacity” |
| Minimum of two context-specific climate-sensitive health risks for children identified | No |  |  |
| Source of background is explicit  Authority (one or more persons, books, scientific articles or sources of information)  Quantitative or qualitative analysis,  Deduction (premises that have been established from authority, observation, intuition or all three) | No |  |  |
| Goals | Goals for child health explicitly stated | No |  |  |
| Goals are concrete enough (quantitative where possible and qualitative where not) to be evaluated later | No |  |  |
| Goal is clear in its intent and in the mechanism with which to achieve the desired goals, yet does not attempt to prescribe in detail what the change must be | No |  |  |
| Action/s outlined to improve child health | No | Integrating climate change impacts and adaptation into education curricula is described. It is unclear whether this includes health information. |  |
| Mechanisms by which children and/or pregnant women will be specifically targeted by the action are explicitly stated | No |  |  |
| Minimum of two actions | No |  |  |
| Actions comprehensively address climate-sensitive health risks identified in policy background | No |  |  |
| Resources | Financial resources addressed  Estimated financial resources for implementation of the action/s given  Allocated financial resources for implementation of the action/s clear  Rewards/sanctions for spending allocated resources on other programs | No |  |  |
| Human resources addressed | No |  |  |
| Organisational capacity addressed | No |  |  |
| Policy indicated strategies to mobilise required resources | No |  |  |
| Monitoring and Evaluation | Policy indicated monitoring and evaluation mechanisms to track progress on goals for child health | No |  |  |
| Policy nominated a committee or independent body to do evaluation | No |  |  |
| Outcome measures identified for each of the explicit and implicit objectives | No |  |  |
| Data for evaluation will be collected before, during, and after introduction of the new policy | No |  |  |
| Follow-up takes place after a sufficient period to allow the effects of policy change to become evident | No |  |  |
| Other factors that could have produced the change (other than policy) identified | No |  |  |
| Criteria for evaluation adequate or clear | No |  |  |
| Implementation | Multiple stakeholders involved in the design and implementation of the action/s | No |  |  |
| Obligations of the various implementers specified – who has to do what? | No |  |  |

Summary

| **Criteria** | **Quality** |
| --- | --- |
| Policy Background | Needs improvement |
| Goals | Weak |
| Resources | Weak |
| Monitoring and Evaluation | Weak |
| Implementation | Weak |

### **Kuwait** – Kuwait National Adaptation Plan 2019-2030

|  | **Criteria** | **Criterion addressed?** | **Explanation** | **Quote** |
| --- | --- | --- | --- | --- |
| Policy Background | Children recognised as disproportionately affected by the impacts of climate change | Yes |  |  |
| Minimum of two context-specific climate-sensitive health risks for children identified | Yes | Climate risk areas identified: extreme weather events; respiratory illnesses. | “The risks of increased dust events… on health sector… threaten certain susceptible population categories. Dust events affect children…”  “As the number of asthma patients rises, this will not only increase pressure on healthcare facilities but also will lead to various negative consequences, including increased mortality: Children and elderly people are the most vulnerable category.” |
| Source of background is explicit  Authority (one or more persons, books, scientific articles or sources of information)  Quantitative or qualitative analysis,  Deduction (premises that have been established from authority, observation, intuition or all three) | Yes | Qualitative analysis using methodology from scientific articles; governmental publications |  |
| Goals | Specific Goals for child health explicitly stated | No |  |  |
| Goals are concrete enough (quantitative where possible and qualitative where not) to be evaluated later | No |  |  |
| Goal is clear in its intent and in the mechanism with which to achieve the desired goals, yet does not attempt to prescribe in detail what the change must be | No |  |  |
| Action/s outlined to improve child health | Yes | Include health information in the early education curriculum | “Include information and instructions about Climate Change Effects on Health in the early education curriculum” |
| Mechanisms by which children and/or pregnant women will be specifically targeted by the action are explicitly stated | Yes | Health information is included in the early education curriculum, specifically for young children. |  |
| Minimum of two actions | No |  |  |
| Actions comprehensively address climate-sensitive health risks identified in policy background | No |  |  |
| Resources | Financial resources addressed  Estimated financial resources for implementation of the action/s given  Allocated financial resources for implementation of the action/s clear  Rewards/sanctions for spending allocated resources on other programs | No |  |  |
| Human resources addressed | No |  |  |
| Organisational capacity addressed | No |  |  |
| Policy indicated strategies to mobilise required resources | No |  |  |
| Monitoring and Evaluation | Policy indicated monitoring and evaluation mechanisms to track progress on goals for child health | No |  |  |
| Policy nominated a committee or independent body to do evaluation | No |  |  |
| Outcome measures identified for each of the explicit and implicit objectives | No |  |  |
| Data for evaluation will be collected before, during, and after introduction of the new policy | No |  |  |
| Follow-up takes place after a sufficient period to allow the effects of policy change to become evident | No |  |  |
| Other factors that could have produced the change (other than policy) identified | No |  |  |
| Criteria for evaluation adequate or clear | No |  |  |
| Implementation | Multiple stakeholders involved in the design and implementation of the action/s | Yes | Ministry of Health, Minister of Higher Education and others |  |
| Obligations of the various implementers specified – who has to do what? | No |  |  |

Summary

| **Criteria** | **Quality** |
| --- | --- |
| Policy Background | Needs improvement |
| Goals | Needs improvement |
| Resources | Weak |
| Monitoring and Evaluation | Weak |
| Implementation | Needs improvement |

### **Lebanon** – Lebanon’s Nationally Determined Contribution

|  | **Criteria** | **Criterion addressed?** | **Explanation** | **Quote** |
| --- | --- | --- | --- | --- |
| Policy Background | Children recognised as disproportionately affected by the impacts of climate change | No |  |  |
| Minimum of two context-specific climate-sensitive health risks for children identified | No |  |  |
| Source of background is explicit  Authority (one or more persons, books, scientific articles or sources of information)  Quantitative or qualitative analysis,  Deduction (premises that have been established from authority, observation, intuition or all three) | No |  |  |
| Goals | Goals for child health explicitly stated | No |  |  |
| Goals are concrete enough (quantitative where possible and qualitative where not) to be evaluated later | No |  |  |
| Goal is clear in its intent and in the mechanism with which to achieve the desired goals, yet does not attempt to prescribe in detail what the change must be | No |  |  |
| Action/s outlined to improve child health | No |  |  |
| Mechanisms by which children and/or pregnant women will be specifically targeted by the action are explicitly stated | No |  |  |
| Minimum of two actions | No |  |  |
| Actions comprehensively address climate-sensitive health risks identified in policy background | No |  |  |
| Resources | Financial resources addressed  Estimated financial resources for implementation of the action/s given  Allocated financial resources for implementation of the action/s clear  Rewards/sanctions for spending allocated resources on other programs | No |  |  |
| Human resources addressed | No |  |  |
| Organisational capacity addressed | No |  |  |
| Policy indicated strategies to mobilise required resources | No |  |  |
| Monitoring and Evaluation | Policy indicated monitoring and evaluation mechanisms to track progress on goals for child health | No |  |  |
| Policy nominated a committee or independent body to do evaluation | No |  |  |
| Outcome measures identified for each of the explicit and implicit objectives | No |  |  |
| Data for evaluation will be collected before, during, and after introduction of the new policy | No |  |  |
| Follow-up takes place after a sufficient period to allow the effects of policy change to become evident | No |  |  |
| Other factors that could have produced the change (other than policy) identified | No |  |  |
| Criteria for evaluation adequate or clear | No |  |  |
| Implementation | Multiple stakeholders involved in the design and implementation of the action/s | No |  |  |
| Obligations of the various implementers specified – who has to do what? | No |  |  |

Summary

| **Criteria** | **Quality** |
| --- | --- |
| Policy Background | Weak |
| Goals | Weak |
| Resources | Weak |
| Monitoring and Evaluation | Weak |
| Implementation | Weak |

### **Libya** – none

### **Morocco** – Plan National Stratégique d’Adaptation

|  | **Criteria** | **Criterion addressed?** | **Explanation** | **Quote** |
| --- | --- | --- | --- | --- |
| Policy Background | Children recognised as disproportionately affected by the impacts of climate change | No |  |  |
| Minimum of two context-specific climate-sensitive health risks for children identified | No | Climate risks: food- and water-borne disease, respiratory illnesses, extreme weather events | “Diarrheal diseases and respiratory illnesses linked to extreme climatic events, which will affect children as a result of cold snaps and floods.” |
| Source of background is explicit  Authority (one or more persons, books, scientific articles or sources of information)  Quantitative or qualitative analysis,  Deduction (premises that have been established from authority, observation, intuition or all three) | Yes | Ministry of Health vulnerability analysis |  |
| Goals | Goals for child health explicitly stated | No |  |  |
| Goals are concrete enough (quantitative where possible and qualitative where not) to be evaluated later | No |  |  |
| Goal is clear in its intent and in the mechanism with which to achieve the desired goals, yet does not attempt to prescribe in detail what the change must be | No |  |  |
| Action/s outlined to improve child health | Yes | Disaster preparedness of schools: regular maintenance, compliance with safety regulations, regular disaster preparedness drills | “Evaluate the safety of all schools and health facilities, and improve as needed: set up special programs to regularly evaluate schools, hospitals and health facilities in terms of maintenance needs, compliance with building codes and safety regulations, and exposure to weather hazards; organize regular disaster preparedness drills in schools, hospitals and health facilities.” |
| Mechanisms by which children and/or pregnant women will be specifically targeted by the action are explicitly stated | Yes | Programs are implemented in schools |  |
| Minimum of two actions | No |  |  |
| Actions comprehensively address climate-sensitive health risks identified in policy background | No |  |  |
| Resources | Financial resources addressed  Estimated financial resources for implementation of the action/s given  Allocated financial resources for implementation of the action/s clear  Rewards/sanctions for spending allocated resources on other programs | No |  |  |
| Human resources addressed | No |  |  |
| Organisational capacity addressed | No |  |  |
| Policy indicated strategies to mobilise required resources | No |  |  |
| Monitoring and Evaluation | Policy indicated monitoring and evaluation mechanisms to track progress on goals for child health | No |  |  |
| Policy nominated a committee or independent body to do evaluation | No |  |  |
| Outcome measures identified for each of the explicit and implicit objectives | No |  |  |
| Data for evaluation will be collected before, during, and after introduction of the new policy | No |  |  |
| Follow-up takes place after a sufficient period to allow the effects of policy change to become evident | No |  |  |
| Other factors that could have produced the change (other than policy) identified | No |  |  |
| Criteria for evaluation adequate or clear | No |  |  |
| Implementation | Multiple stakeholders involved in the design and implementation of the action/s | No |  |  |
| Obligations of the various implementers specified – who has to do what? | No |  |  |

Summary

| **Criteria** | **Quality** |
| --- | --- |
| Policy Background | Needs improvement |
| Goals | Needs improvement |
| Resources | Weak |
| Monitoring and Evaluation | Weak |
| Implementation | Weak |

### **Oman** – National Strategy for Adaptation and Mitigation to Climate Change for the Sultanate of Oman (2020-2040)

|  | **Criteria** | **Criterion addressed?** | **Explanation** | **Quote** |
| --- | --- | --- | --- | --- |
| Policy Background | Children recognised as disproportionately affected by the impacts of climate change | No |  |  |
| Minimum of two context-specific climate-sensitive health risks for children identified | No |  |  |
| Source of background is explicit  Authority (one or more persons, books, scientific articles or sources of information)  Quantitative or qualitative analysis,  Deduction (premises that have been established from authority, observation, intuition or all three) | No |  |  |
| Goals | Goals for child health explicitly stated | No |  |  |
| Goals are concrete enough (quantitative where possible and qualitative where not) to be evaluated later | No |  |  |
| Goal is clear in its intent and in the mechanism with which to achieve the desired goals, yet does not attempt to prescribe in detail what the change must be | No |  |  |
| Action/s outlined to improve child health | No |  |  |
| Mechanisms by which children and/or pregnant women will be specifically targeted by the action are explicitly stated | No |  |  |
| Minimum of two actions | No |  |  |
| Actions comprehensively address climate-sensitive health risks identified in policy background | No |  |  |
| Resources | Financial resources addressed  Estimated financial resources for implementation of the action/s given  Allocated financial resources for implementation of the action/s clear  Rewards/sanctions for spending allocated resources on other programs | No |  |  |
| Human resources addressed | No |  |  |
| Organisational capacity addressed | No |  |  |
| Policy indicated strategies to mobilise required resources | No |  |  |
| Monitoring and Evaluation | Policy indicated monitoring and evaluation mechanisms to track progress on goals for child health | No |  |  |
| Policy nominated a committee or independent body to do evaluation | No |  |  |
| Outcome measures identified for each of the explicit and implicit objectives | No |  |  |
| Data for evaluation will be collected before, during, and after introduction of the new policy | No |  |  |
| Follow-up takes place after a sufficient period to allow the effects of policy change to become evident | No |  |  |
| Other factors that could have produced the change (other than policy) identified | No |  |  |
| Criteria for evaluation adequate or clear | No |  |  |
| Implementation | Multiple stakeholders involved in the design and implementation of the action/s | No |  |  |
| Obligations of the various implementers specified – who has to do what? | No |  |  |

Summary

| **Criteria** | **Quality** |
| --- | --- |
| Policy Background | Weak |
| Goals | Weak |
| Resources | Weak |
| Monitoring and Evaluation | Weak |
| Implementation | Weak |

### **Pakistan** – National Adaptation Plan Pakistan 2023

|  | **Criteria** | **Criterion addressed?** | **Explanation** | **Quote** |
| --- | --- | --- | --- | --- |
| Policy Background | Children recognised as disproportionately affected by the impacts of climate change | Yes | Children are described as a vulnerable group | “Vulnerable segments of society, including… children, will be particularly impacted due to the accelerated impacts of climate stress, further increasing inequalities in education, health, and labour and economic productivity.” |
| Minimum of two context-specific climate-sensitive health risks for children identified | Yes | Climate risk areas identified: mental and psychosocial health; extreme weather events; malnutrition and food insecurity; respiratory illnesses | “The physical and mental health of children and youth can be impacted, leading to long-term negative repercussions.”  “…the mega flood of 2022 took the lives of more than 1,700 people, one-third of them children… Drought periods (1969, 1974, 1987, 2002, and 2013-2015) have been associated with acute and chronic malnutrition. In Tharpakar (Sindh), for example, many children died of malnutrition in 2014 after severely reduced rainfall from March 2013 to February 2014.”  “Children are highly sensitive to air and water pollutants, which can have lifetime consequences in terms of diseases, disability, cognitive impairment, and death.” |
| Source of background is explicit  Authority (one or more persons, books, scientific articles or sources of information)  Quantitative or qualitative analysis,  Deduction (premises that have been established from authority, observation, intuition or all three) | Yes | Observation, scientific articles |  |
| Goals | Specific Goals for child health explicitly stated | Yes | Goal is to support vulnerable groups in disaster risk management, which includes children. | “Support Vulnerable Groups in Strengthening Their Capacity for DRM” |
| Goals are concrete enough (quantitative where possible and qualitative where not) to be evaluated later | No |  |  |
| Goal is clear in its intent and in the mechanism with which to achieve the desired goals, yet does not attempt to prescribe in detail what the change must be | No | The goal is not clear enough in its intent. |  |
| Action/s outlined to improve child health | Yes | Helpline for reporting gender-based violence and child marriage during and post-disasters | “Set up a helpline for reporting gender-based violence (GBV) and child marriage to protect women and girls during and post disasters” |
| Mechanisms by which children and/or pregnant women will be specifically targeted by the action are explicitly stated | No | Unclear how girls will specifically be targeted by the helpline. |  |
| Minimum of two actions | No |  |  |
| Actions comprehensively address climate-sensitive health risks identified in policy background | No |  |  |
| Resources | Financial resources addressed  Estimated financial resources for implementation of the action/s given  Allocated financial resources for implementation of the action/s clear  Rewards/sanctions for spending allocated resources on other programs | No |  |  |
| Human resources addressed | No |  |  |
| Organisational capacity addressed | No |  |  |
| Policy indicated strategies to mobilise required resources | No |  |  |
| Monitoring and Evaluation | Policy indicated monitoring and evaluation mechanisms to track progress on goals for child health | No |  |  |
| Policy nominated a committee or independent body to do evaluation | No |  |  |
| Outcome measures identified for each of the explicit and implicit objectives | No |  |  |
| Data for evaluation will be collected before, during, and after introduction of the new policy | No |  |  |
| Follow-up takes place after a sufficient period to allow the effects of policy change to become evident | No |  |  |
| Other factors that could have produced the change (other than policy) identified | No |  |  |
| Criteria for evaluation adequate or clear | No |  |  |
| Implementation | Multiple stakeholders involved in the design and implementation of the action/s | Yes | MoI; Provincial, ICT, GB and AJK Departments of Interior, Social Protection; National Commission for Human Rights; National Commission on Rights of Child |  |
| Obligations of the various implementers specified – who has to do what? | No |  |  |

Summary

| **Criteria** | **Quality** |
| --- | --- |
| Policy Background | Strong |
| Goals | Needs improvement |
| Resources | Weak |
| Monitoring and Evaluation | Weak |
| Implementation | Needs improvement |

### **Qatar** – Nationally Determined Contribution

|  | **Criteria** | **Criterion addressed?** | **Explanation** | **Quote** |
| --- | --- | --- | --- | --- |
| Policy Background | Children recognised as disproportionately affected by the impacts of climate change | No |  |  |
| Minimum of two context-specific climate-sensitive health risks for children identified | No |  |  |
| Source of background is explicit  Authority (one or more persons, books, scientific articles or sources of information)  Quantitative or qualitative analysis,  Deduction (premises that have been established from authority, observation, intuition or all three) | No |  |  |
| Goals | Goals for child health explicitly stated | No |  |  |
| Goals are concrete enough (quantitative where possible and qualitative where not) to be evaluated later | No |  |  |
| Goal is clear in its intent and in the mechanism with which to achieve the desired goals, yet does not attempt to prescribe in detail what the change must be | No |  |  |
| Action/s outlined to improve child health | No |  |  |
| Mechanisms by which children and/or pregnant women will be specifically targeted by the action are explicitly stated | No |  |  |
| Minimum of two actions | No |  |  |
| Actions comprehensively address climate-sensitive health risks identified in policy background | No |  |  |
| Resources | Financial resources addressed  Estimated financial resources for implementation of the action/s given  Allocated financial resources for implementation of the action/s clear  Rewards/sanctions for spending allocated resources on other programs | No |  |  |
| Human resources addressed | No |  |  |
| Organisational capacity addressed | No |  |  |
| Policy indicated strategies to mobilise required resources | No |  |  |
| Monitoring and Evaluation | Policy indicated monitoring and evaluation mechanisms to track progress on goals for child health | No |  |  |
| Policy nominated a committee or independent body to do evaluation | No |  |  |
| Outcome measures identified for each of the explicit and implicit objectives | No |  |  |
| Data for evaluation will be collected before, during, and after introduction of the new policy | No |  |  |
| Follow-up takes place after a sufficient period to allow the effects of policy change to become evident | No |  |  |
| Other factors that could have produced the change (other than policy) identified | No |  |  |
| Criteria for evaluation adequate or clear | No |  |  |
| Implementation | Multiple stakeholders involved in the design and implementation of the action/s | No |  |  |
| Obligations of the various implementers specified – who has to do what? | No |  |  |

Summary

| **Criteria** | **Quality** |
| --- | --- |
| Policy Background | Weak |
| Goals | Weak |
| Resources | Weak |
| Monitoring and Evaluation | Weak |
| Implementation | Weak |

### **Saudi** **Arabia** – Updated First Nationally Determined Contribution

|  | **Criteria** | **Criterion addressed?** | **Explanation** | **Quote** |
| --- | --- | --- | --- | --- |
| Policy Background | Children recognised as disproportionately affected by the impacts of climate change | No |  |  |
| Minimum of two context-specific climate-sensitive health risks for children identified | No |  |  |
| Source of background is explicit  Authority (one or more persons, books, scientific articles or sources of information)  Quantitative or qualitative analysis,  Deduction (premises that have been established from authority, observation, intuition or all three) | No |  |  |
| Goals | Goals for child health explicitly stated | No |  |  |
| Goals are concrete enough (quantitative where possible and qualitative where not) to be evaluated later | No |  |  |
| Goal is clear in its intent and in the mechanism with which to achieve the desired goals, yet does not attempt to prescribe in detail what the change must be | No |  |  |
| Action/s outlined to improve child health | No |  |  |
| Mechanisms by which children and/or pregnant women will be specifically targeted by the action are explicitly stated | No |  |  |
| Minimum of two actions | No |  |  |
| Actions comprehensively address climate-sensitive health risks identified in policy background | No |  |  |
| Resources | Financial resources addressed  Estimated financial resources for implementation of the action/s given  Allocated financial resources for implementation of the action/s clear  Rewards/sanctions for spending allocated resources on other programs | No |  |  |
| Human resources addressed | No |  |  |
| Organisational capacity addressed | No |  |  |
| Policy indicated strategies to mobilise required resources | No |  |  |
| Monitoring and Evaluation | Policy indicated monitoring and evaluation mechanisms to track progress on goals for child health | No |  |  |
| Policy nominated a committee or independent body to do evaluation | No |  |  |
| Outcome measures identified for each of the explicit and implicit objectives | No |  |  |
| Data for evaluation will be collected before, during, and after introduction of the new policy | No |  |  |
| Follow-up takes place after a sufficient period to allow the effects of policy change to become evident | No |  |  |
| Other factors that could have produced the change (other than policy) identified | No |  |  |
| Criteria for evaluation adequate or clear | No |  |  |
| Implementation | Multiple stakeholders involved in the design and implementation of the action/s | No |  |  |
| Obligations of the various implementers specified – who has to do what? | No |  |  |

Summary

| **Criteria** | **Quality** |
| --- | --- |
| Policy Background | Weak |
| Goals | Weak |
| Resources | Weak |
| Monitoring and Evaluation | Weak |
| Implementation | Weak |

### **Somalia** – Somalia National Climate Change Policy

|  | **Criteria** | **Criterion addressed?** | **Explanation** | **Quote** |
| --- | --- | --- | --- | --- |
| Policy Background | Children recognised as disproportionately affected by the impacts of climate change | Yes |  | “Marginalised groups such as… children are at risk of being most affected by climate change and variability due to insufficient access to basic resources.” |
| Minimum of two context-specific climate-sensitive health risks for children identified | No | Climate risk areas: malnutrition and food insecurity | “…shortages of food lead to malnutrition particularly among children, mothers and youths…” |
| Source of background is explicit  Authority (one or more persons, books, scientific articles or sources of information)  Quantitative or qualitative analysis,  Deduction (premises that have been established from authority, observation, intuition or all three) | No |  |  |
| Goals | Goals for child health explicitly stated | Yes | Under 5.4.1 Health and 5.4.3. Gender Issues in Climate Change | “Understand the impacts of climate change on women, children, youth and people living with disabilities in Somalia and create an enabling environment that prevents harm to these vulnerable groups emanating from pressures of these impacts.”  “Increase the resilience of vulnerable groups, including women and children, through the development of community-led adaptation, livelihood diversification, better access to basic services and social protection (safety nets, insurance)” |
| Goals are concrete enough (quantitative where possible and qualitative where not) to be evaluated later | No |  |  |
| Goal is clear in its intent and in the mechanism with which to achieve the desired goals, yet does not attempt to prescribe in detail what the change must be | No |  |  |
| Action/s outlined to improve child health | Yes | Community-led adaptation, livelihood diversification and better access to basic services and social protection has been described in the goals |  |
| Mechanisms by which children and/or pregnant women will be specifically targeted by the action are explicitly stated | No |  |  |
| Minimum of two actions | No |  |  |
| Actions comprehensively address climate-sensitive health risks identified in policy background | No |  |  |
| Resources | Financial resources addressed  Estimated financial resources for implementation of the action/s given  Allocated financial resources for implementation of the action/s clear  Rewards/sanctions for spending allocated resources on other programs | No |  |  |
| Human resources addressed | No |  |  |
| Organisational capacity addressed | No |  |  |
| Policy indicated strategies to mobilise required resources | No |  |  |
| Monitoring and Evaluation | Policy indicated monitoring and evaluation mechanisms to track progress on goals for child health | No |  |  |
| Policy nominated a committee or independent body to do evaluation | No |  |  |
| Outcome measures identified for each of the explicit and implicit objectives | No |  |  |
| Data for evaluation will be collected before, during, and after introduction of the new policy | No |  |  |
| Follow-up takes place after a sufficient period to allow the effects of policy change to become evident | No |  |  |
| Other factors that could have produced the change (other than policy) identified | No |  |  |
| Criteria for evaluation adequate or clear | No |  |  |
| Implementation | Multiple stakeholders involved in the design and implementation of the action/s | No |  |  |
| Obligations of the various implementers specified – who has to do what? | No |  |  |

Summary

| **Criteria** | **Quality** |
| --- | --- |
| Policy Background | Needs improvement |
| Goals | Needs improvement |
| Resources | Weak |
| Monitoring and Evaluation | Weak |
| Implementation | Weak |

### **Sudan** – National Adaptation Plan

|  | **Criteria** | **Criterion addressed?** | **Explanation** | **Quote** |
| --- | --- | --- | --- | --- |
| Policy Background | Children recognised as disproportionately affected by the impacts of climate change | Yes |  | “High ratios of maternal and child mortality” |
| Minimum of two context-specific climate-sensitive health risks for children identified | Yes | Climate risk areas identified: heat-related illnesses, extreme weather events; respiratory illnesses; water- and food-borne diseases; malnutrition and food insecurity | “Increase of temperature; increase in frequency of drought and floods; Scarcity and fluctuation of rainfall” in Gadaref State  “[Infants, children, pregnant women and mothers are vulnerable to] malnutrition; meningitis; respiratory diseases; change of insect vector distribution pattern; thermal stress specially for elderly people & infant; spread of endemic diseases during disasters; increase of infant mortality rate; spread of endemic diseases in new site and bringing unexpected diseases that are not recorded in the state; water- and food-borne diseases; spread of fungal disease due to drought; spread of [cutaneous leishmaniasis] due to rain delay” in Khartoum State  “All populations in poor condition, especially… (a) Infant (b) under five (c) pregnant (d) preschool children… [are vulnerable to] desertification; water scarcity; lack of safe water; famine; open [defecation] & urination” in Gezera State |
| Source of background is explicit  Authority (one or more persons, books, scientific articles or sources of information)  Quantitative or qualitative analysis,  Deduction (premises that have been established from authority, observation, intuition or all three) | Yes | State-level vulnerability assessments |  |
| Goals | Goals for child health explicitly stated | Yes |  | “Control of malnutrition and diarrhea among children under five” |
| Goals are concrete enough (quantitative where possible and qualitative where not) to be evaluated later | Yes |  |  |
| Goal is clear in its intent and in the mechanism with which to achieve the desired goals, yet does not attempt to prescribe in detail what the change must be | No | Mechanisms are unclear |  |
| Action/s outlined to improve child health | Yes | Programme: Control of Endemic and Epidemic Diseases induced by Climate Change |  |
| Mechanisms by which children and/or pregnant women will be specifically targeted by the action are explicitly stated | No | Unclear what specific actions will be taken through the programme |  |
| Minimum of two actions | No |  |  |
| Actions comprehensively address climate-sensitive health risks identified in policy background | No |  |  |
| Resources | Financial resources addressed  Estimated financial resources for implementation of the action/s given  Allocated financial resources for implementation of the action/s clear  Rewards/sanctions for spending allocated resources on other programs | No |  |  |
| Human resources addressed | No |  |  |
| Organisational capacity addressed | No |  |  |
| Policy indicated strategies to mobilise required resources | No |  |  |
| Monitoring and Evaluation | Policy indicated monitoring and evaluation mechanisms to track progress on goals for child health | No |  |  |
| Policy nominated a committee or independent body to do evaluation | No |  |  |
| Outcome measures identified for each of the explicit and implicit objectives | No |  |  |
| Data for evaluation will be collected before, during, and after introduction of the new policy | No |  |  |
| Follow-up takes place after a sufficient period to allow the effects of policy change to become evident | No |  |  |
| Other factors that could have produced the change (other than policy) identified | No |  |  |
| Criteria for evaluation adequate or clear | No |  |  |
| Implementation | Multiple stakeholders involved in the design and implementation of the action/s | No | Stakeholders for above programme have not been specified |  |
| Obligations of the various implementers specified – who has to do what? | No |  |  |

Summary

| **Criteria** | **Quality** |
| --- | --- |
| Policy Background | Strong |
| Goals | Needs improvement |
| Resources | Weak |
| Monitoring and Evaluation | Weak |
| Implementation | Weak |

### **Syrian Arab Republic** – Nationally Determined Contribution

|  | **Criteria** | **Criterion addressed?** | **Explanation** | **Quote** |
| --- | --- | --- | --- | --- |
| Policy Background | Children recognised as disproportionately affected by the impacts of climate change | No | No mention of children in the policy |  |
| Minimum of two context-specific climate-sensitive health risks for children identified | No |  |  |
| Source of background is explicit  Authority (one or more persons, books, scientific articles or sources of information)  Quantitative or qualitative analysis,  Deduction (premises that have been established from authority, observation, intuition or all three) | No |  |  |
| Goals | Goals for child health explicitly stated | No |  |  |
| Goals are concrete enough (quantitative where possible and qualitative where not) to be evaluated later | No |  |  |
| Goal is clear in its intent and in the mechanism with which to achieve the desired goals, yet does not attempt to prescribe in detail what the change must be | No |  |  |
| Action/s outlined to improve child health | No |  |  |
| Mechanisms by which children and/or pregnant women will be specifically targeted by the action are explicitly stated | No |  |  |
| Minimum of two actions | No |  |  |
| Actions comprehensively address climate-sensitive health risks identified in policy background | No |  |  |
| Resources | Financial resources addressed  Estimated financial resources for implementation of the action/s given  Allocated financial resources for implementation of the action/s clear  Rewards/sanctions for spending allocated resources on other programs | No |  |  |
| Human resources addressed | No |  |  |
| Organisational capacity addressed | No |  |  |
| Policy indicated strategies to mobilise required resources | No |  |  |
| Monitoring and Evaluation | Policy indicated monitoring and evaluation mechanisms to track progress on goals for child health | No |  |  |
| Policy nominated a committee or independent body to do evaluation | No |  |  |
| Outcome measures identified for each of the explicit and implicit objectives | No |  |  |
| Data for evaluation will be collected before, during, and after introduction of the new policy | No |  |  |
| Follow-up takes place after a sufficient period to allow the effects of policy change to become evident | No |  |  |
| Other factors that could have produced the change (other than policy) identified | No |  |  |
| Criteria for evaluation adequate or clear | No |  |  |
| Implementation | Multiple stakeholders involved in the design and implementation of the action/s | No |  |  |
| Obligations of the various implementers specified – who has to do what? | No |  |  |

Summary

| **Criteria** | **Quality** |
| --- | --- |
| Policy Background | Weak |
| Goals | Weak |
| Resources | Weak |
| Monitoring and Evaluation | Weak |
| Implementation | Weak |

### **Tunisia** – Updated Nationally Determined Contribution

|  | **Criteria** | **Criterion addressed?** | **Explanation** | **Quote** |
| --- | --- | --- | --- | --- |
| Policy Background | Children recognised as disproportionately affected by the impacts of climate change | No |  |  |
| Minimum of two context-specific climate-sensitive health risks for children identified | No |  |  |
| Source of background is explicit  Authority (one or more persons, books, scientific articles or sources of information)  Quantitative or qualitative analysis,  Deduction (premises that have been established from authority, observation, intuition or all three) | No |  |  |
| Goals | Goals for child health explicitly stated | No |  |  |
| Goals are concrete enough (quantitative where possible and qualitative where not) to be evaluated later | No |  |  |
| Goal is clear in its intent and in the mechanism with which to achieve the desired goals, yet does not attempt to prescribe in detail what the change must be | No |  |  |
| Action/s outlined to improve child health | No | More information is needed on “the allocation of maternal and child health specialists and programs” – what health issues will this address? | “Specify adequate human resources policies in the health sector, capable of reducing regional disparities, particularly in terms of access to health care, and rethink the programming of specialties and the allocation of maternal and child health specialists and programs in the interior regions of the country.” |
| Mechanisms by which children and/or pregnant women will be specifically targeted by the action are explicitly stated | No |  |  |
| Minimum of two actions | No |  |  |
| Actions comprehensively address climate-sensitive health risks identified in policy background | No |  |  |
| Resources | Financial resources addressed  Estimated financial resources for implementation of the action/s given  Allocated financial resources for implementation of the action/s clear  Rewards/sanctions for spending allocated resources on other programs | No |  |  |
| Human resources addressed | No |  |  |
| Organisational capacity addressed | No |  |  |
| Policy indicated strategies to mobilise required resources | No |  |  |
| Monitoring and Evaluation | Policy indicated monitoring and evaluation mechanisms to track progress on goals for child health | No |  |  |
| Policy nominated a committee or independent body to do evaluation | No |  |  |
| Outcome measures identified for each of the explicit and implicit objectives | No |  |  |
| Data for evaluation will be collected before, during, and after introduction of the new policy | No |  |  |
| Follow-up takes place after a sufficient period to allow the effects of policy change to become evident | No |  |  |
| Other factors that could have produced the change (other than policy) identified | No |  |  |
| Criteria for evaluation adequate or clear | No |  |  |
| Implementation | Multiple stakeholders involved in the design and implementation of the action/s | No |  |  |
| Obligations of the various implementers specified – who has to do what? | No |  |  |

Summary

| **Criteria** | **Quality** |
| --- | --- |
| Policy Background | Weak |
| Goals | Weak |
| Resources | Weak |
| Monitoring and Evaluation | Weak |
| Implementation | Weak |

### **United Arab Emirates** – National Climate Change Plan of the United Arab Emirates 2017-2050

|  | **Criteria** | **Criterion addressed?** | **Explanation** | **Quote** |
| --- | --- | --- | --- | --- |
| Policy Background | Children recognised as disproportionately affected by the impacts of climate change | No |  |  |
| Minimum of two context-specific climate-sensitive health risks for children identified | No |  |  |
| Source of background is explicit  Authority (one or more persons, books, scientific articles or sources of information)  Quantitative or qualitative analysis,  Deduction (premises that have been established from authority, observation, intuition or all three) | No |  |  |
| Goals | Goals for child health explicitly stated | No |  |  |
| Goals are concrete enough (quantitative where possible and qualitative where not) to be evaluated later | No |  |  |
| Goal is clear in its intent and in the mechanism with which to achieve the desired goals, yet does not attempt to prescribe in detail what the change must be | No |  |  |
| Action/s outlined to improve child health | No |  |  |
| Mechanisms by which children and/or pregnant women will be specifically targeted by the action are explicitly stated | No |  |  |
| Minimum of two actions | No |  |  |
| Actions comprehensively address climate-sensitive health risks identified in policy background | No |  |  |
| Resources | Financial resources addressed  Estimated financial resources for implementation of the action/s given  Allocated financial resources for implementation of the action/s clear  Rewards/sanctions for spending allocated resources on other programs | No |  |  |
| Human resources addressed | No |  |  |
| Organisational capacity addressed | No |  |  |
| Policy indicated strategies to mobilise required resources | No |  |  |
| Monitoring and Evaluation | Policy indicated monitoring and evaluation mechanisms to track progress on goals for child health | No |  |  |
| Policy nominated a committee or independent body to do evaluation | No |  |  |
| Outcome measures identified for each of the explicit and implicit objectives | No |  |  |
| Data for evaluation will be collected before, during, and after introduction of the new policy | No |  |  |
| Follow-up takes place after a sufficient period to allow the effects of policy change to become evident | No |  |  |
| Other factors that could have produced the change (other than policy) identified | No |  |  |
| Criteria for evaluation adequate or clear | No |  |  |
| Implementation | Multiple stakeholders involved in the design and implementation of the action/s | No |  |  |
| Obligations of the various implementers specified – who has to do what? | No |  |  |

Summary

| **Criteria** | **Quality** |
| --- | --- |
| Policy Background | Weak |
| Goals | Weak |
| Resources | Weak |
| Monitoring and Evaluation | Weak |
| Implementation | Weak |

###

### **Yemen** – National Communication

|  | **Criteria** | **Criterion addressed?** | **Explanation** | **Quote** |
| --- | --- | --- | --- | --- |
| Policy Background | Children recognised as disproportionately affected by the impacts of climate change | Yes |  |  |
| Minimum of two context-specific climate-sensitive health risks for children identified | Yes | Climate risks: malnutrition and food insecurity; heat-related illness | “Currently, 14.1 million people are lacking sufficient access to basic healthcare and 3 million children and pregnant or lactating women require malnutrition treatment or preventive services.”  “An increase in the number of extreme hot days is projected for the months May through September in the future. Because of Al Mukalla’s heat island effect, this poses significant risks to children and the elderly.”  “Hunger and undernutrition are widespread in these areas, with one in three being acutely hungry; one in two children under 5 being stunted; and more than half of all children under 5 years being underweight.”  “The effects of poor nutrition on growth and development can be highly damaging to children due to their immature physiology and metabolism, their unique exposure pathways, their biological sensitivities and limits to their adaptive capacity. In 2016, more than 40% of the population were children below the age of 15, almost 15% were under the age of 5 and 3% were infants. Young girls, in particular, are generally at greater risk of adverse health outcomes from poor nutrition (DHS, Yemen, 2013). Key factors contributing to poor nutrition are high poverty levels and nearly five children per family (more in rural areas).” |
| Source of background is explicit  Authority (one or more persons, books, scientific articles or sources of information)  Quantitative or qualitative analysis,  Deduction (premises that have been established from authority, observation, intuition or all three) | Yes | National vulnerability assessment |  |
| Goals | Goals for child health explicitly stated | No |  |  |
| Goals are concrete enough (quantitative where possible and qualitative where not) to be evaluated later | No |  |  |
| Goal is clear in its intent and in the mechanism with which to achieve the desired goals, yet does not attempt to prescribe in detail what the change must be | No |  |  |
| Action/s outlined to improve child health | No |  |  |
| Mechanisms by which children and/or pregnant women will be specifically targeted by the action are explicitly stated | No |  |  |
| Minimum of two actions | No |  |  |
| Actions comprehensively address climate-sensitive health risks identified in policy background | No |  |  |
| Resources | Financial resources addressed  Estimated financial resources for implementation of the action/s given  Allocated financial resources for implementation of the action/s clear  Rewards/sanctions for spending allocated resources on other programs | No |  |  |
| Human resources addressed | No |  |  |
| Organisational capacity addressed | No |  |  |
| Policy indicated strategies to mobilise required resources | No |  |  |
| Monitoring and Evaluation | Policy indicated monitoring and evaluation mechanisms to track progress on goals for child health | No |  |  |
| Policy nominated a committee or independent body to do evaluation | No |  |  |
| Outcome measures identified for each of the explicit and implicit objectives | No |  |  |
| Data for evaluation will be collected before, during, and after introduction of the new policy | No |  |  |
| Follow-up takes place after a sufficient period to allow the effects of policy change to become evident | No |  |  |
| Other factors that could have produced the change (other than policy) identified | No |  |  |
| Criteria for evaluation adequate or clear | No |  |  |
| Implementation | Multiple stakeholders involved in the design and implementation of the action/s | No |  |  |
| Obligations of the various implementers specified – who has to do what? | No |  |  |

Summary

| **Criteria** | **Quality** |
| --- | --- |
| Policy Background | Strong |
| Goals | Weak |
| Resources | Weak |
| Monitoring and Evaluation | Weak |
| Implementation | Weak |

# EUROPEAN REGION

### **Albania** – National Adaptation Planning to Climate Change in Albania

|  | **Criteria** | **Criterion addressed?** | **Explanation** | **Quote** |
| --- | --- | --- | --- | --- |
| Policy Background | Children recognised as disproportionately affected by the impacts of climate change | No | No mention of children in the policy |  |
| Minimum of two context-specific climate-sensitive health risks for children identified | No |  |  |
| Source of background is explicit  Authority (one or more persons, books, scientific articles or sources of information)  Quantitative or qualitative analysis,  Deduction (premises that have been established from authority, observation, intuition or all three) | No |  |  |
| Goals | Goals for child health explicitly stated | No |  |  |
| Goals are concrete enough (quantitative where possible and qualitative where not) to be evaluated later | No |  |  |
| Goal is clear in its intent and in the mechanism with which to achieve the desired goals, yet does not attempt to prescribe in detail what the change must be | No |  |  |
| Action/s outlined to improve child health | No |  |  |
| Mechanisms by which children and/or pregnant women will be specifically targeted by the action are explicitly stated | No |  |  |
| Minimum of two actions | No |  |  |
| Actions comprehensively address climate-sensitive health risks identified in policy background | No |  |  |
| Resources | Financial resources addressed  Estimated financial resources for implementation of the action/s given  Allocated financial resources for implementation of the action/s clear  Rewards/sanctions for spending allocated resources on other programs | No |  |  |
| Human resources addressed | No |  |  |
| Organisational capacity addressed | No |  |  |
| Policy indicated strategies to mobilise required resources | No |  |  |
| Monitoring and Evaluation | Policy indicated monitoring and evaluation mechanisms to track progress on goals for child health | No |  |  |
| Policy nominated a committee or independent body to do evaluation | No |  |  |
| Outcome measures identified for each of the explicit and implicit objectives | No |  |  |
| Data for evaluation will be collected before, during, and after introduction of the new policy | No |  |  |
| Follow-up takes place after a sufficient period to allow the effects of policy change to become evident | No |  |  |
| Other factors that could have produced the change (other than policy) identified | No |  |  |
| Criteria for evaluation adequate or clear | No |  |  |
| Implementation | Multiple stakeholders involved in the design and implementation of the action/s | No |  |  |
| Obligations of the various implementers specified – who has to do what? | No |  |  |

Summary

| **Criteria** | **Quality** |
| --- | --- |
| Policy Background | Weak |
| Goals | Weak |
| Resources | Weak |
| Monitoring and Evaluation | Weak |
| Implementation | Weak |

### **Andorra** – Procés d’adaptació d’Andorra al canvi climatic (PAACC)

|  | **Criteria** | **Criterion addressed?** | **Explanation** | **Quote** |
| --- | --- | --- | --- | --- |
| Policy Background | Children recognised as disproportionately affected by the impacts of climate change | Yes |  | “Vulnerability of the most sensitive groups (children and the elderly) and people with fragile health status to the health impacts of climate change.” |
| Minimum of two context-specific climate-sensitive health risks for children identified | No | Climate risks: heat-related illnesses | “Increase in the frequency of heat waves, which will cause impacts negative effects on health, especially among children…” |
| Source of background is explicit  Authority (one or more persons, books, scientific articles or sources of information)  Quantitative or qualitative analysis,  Deduction (premises that have been established from authority, observation, intuition or all three) | Yes | Participant input from working session, original working document |  |
| Goals | Goals for child health explicitly stated | Yes | Improving health care for vulnerable groups, previously established to include children | “Improvement of social and health care for vulnerable groups.” |
| Goals are concrete enough (quantitative where possible and qualitative where not) to be evaluated later | No |  |  |
| Goal is clear in its intent and in the mechanism with which to achieve the desired goals, yet does not attempt to prescribe in detail what the change must be | No |  |  |
| Action/s outlined to improve child health | Yes | Extreme weather alerts | “Generation of alerts to the most vulnerable population in the face of extreme weather events, such as promoting hydration, not leaving the house during extreme periods, etc.” |
| Mechanisms by which children and/or pregnant women will be specifically targeted by the action are explicitly stated | No |  |  |
| Minimum of two actions | No |  |  |
| Actions comprehensively address climate-sensitive health risks identified in policy background | Yes |  |  |
| Resources | Financial resources addressed  Estimated financial resources for implementation of the action/s given  Allocated financial resources for implementation of the action/s clear  Rewards/sanctions for spending allocated resources on other programs | No |  |  |
| Human resources addressed | No |  |  |
| Organisational capacity addressed | No |  |  |
| Policy indicated strategies to mobilise required resources | No |  |  |
| Monitoring and Evaluation | Policy indicated monitoring and evaluation mechanisms to track progress on goals for child health | No |  |  |
| Policy nominated a committee or independent body to do evaluation | No |  |  |
| Outcome measures identified for each of the explicit and implicit objectives | No |  |  |
| Data for evaluation will be collected before, during, and after introduction of the new policy | No |  |  |
| Follow-up takes place after a sufficient period to allow the effects of policy change to become evident | No |  |  |
| Other factors that could have produced the change (other than policy) identified | No |  |  |
| Criteria for evaluation adequate or clear | No |  |  |
| Implementation | Multiple stakeholders involved in the design and implementation of the action/s | No |  |  |
| Obligations of the various implementers specified – who has to do what? | No |  |  |

Summary

| **Criteria** | **Quality** |
| --- | --- |
| Policy Background | Needs improvement |
| Goals | Needs improvement |
| Resources | Weak |
| Monitoring and Evaluation | Weak |
| Implementation | Weak |

### **Armenia** – National Action Program of Adaptation to Climate Change and the List of Measures for 2021-2025

|  | **Criteria** | **Criterion addressed?** | **Explanation** | **Quote** |
| --- | --- | --- | --- | --- |
| Policy Background | Children recognised as disproportionately affected by the impacts of climate change | No |  |  |
| Minimum of two context-specific climate-sensitive health risks for children identified | No |  |  |
| Source of background is explicit  Authority (one or more persons, books, scientific articles or sources of information)  Quantitative or qualitative analysis,  Deduction (premises that have been established from authority, observation, intuition or all three) | No |  |  |
| Goals | Specific Goals for child health explicitly stated | No |  |  |
| Goals are concrete enough (quantitative where possible and qualitative where not) to be evaluated later | No |  |  |
| Goal is clear in its intent and in the mechanism with which to achieve the desired goals, yet does not attempt to prescribe in detail what the change must be | No |  |  |
| Action/s outlined to improve child health | No |  |  |
| Mechanisms by which children and/or pregnant women will be specifically targeted by the action are explicitly stated | No |  |  |
| Minimum of two actions | No |  |  |
| Actions comprehensively address climate-sensitive health risks identified in policy background | No |  |  |
| Resources | Financial resources addressed  Estimated financial resources for implementation of the action/s given  Allocated financial resources for implementation of the action/s clear  Rewards/sanctions for spending allocated resources on other programs | No |  |  |
| Human resources addressed | No |  |  |
| Organisational capacity addressed | No |  |  |
| Policy indicated strategies to mobilise required resources | No |  |  |
| Monitoring and Evaluation | Policy indicated monitoring and evaluation mechanisms to track progress on goals for child health | No |  |  |
| Policy nominated a committee or independent body to do evaluation | No |  |  |
| Outcome measures identified for each of the explicit and implicit objectives | No |  |  |
| Data for evaluation will be collected before, during, and after introduction of the new policy | No |  |  |
| Follow-up takes place after a sufficient period to allow the effects of policy change to become evident | No |  |  |
| Other factors that could have produced the change (other than policy) identified | No |  |  |
| Criteria for evaluation adequate or clear | No |  |  |
| Implementation | Multiple stakeholders involved in the design and implementation of the action/s | No |  |  |
| Obligations of the various implementers specified – who has to do what? | No |  |  |

Summary

| **Criteria** | **Quality** |
| --- | --- |
| Policy Background | Weak |
| Goals | Weak |
| Resources | Weak |
| Monitoring and Evaluation | Weak |
| Implementation | Weak |

### **Austria** – The Austrian Strategy for Adaptation to Climate Change

|  | **Criteria** | **Criterion addressed?** | **Explanation** | **Quote** |
| --- | --- | --- | --- | --- |
| Policy Background | Children recognised as disproportionately affected by the impacts of climate change | Yes |  | “It can be assumed that the following Austrian population groups will be particularly affected by climate change and by potential adaptation measures due to their location and/or socio-economic situation: …children…” |
| Minimum of two context-specific climate-sensitive health risks for children identified | No | Climate risk areas: heat-related illnesses | “Experiences from the past show the effects prolonged extreme heat waves can have on segments of the population such as children, the sick, and the elderly.”  “Heat can lead to dehydration, make various illnesses worse, and also cause heat cramps, sunstroke and heat stroke. The risk is high for… babies and children.” |
| Source of background is explicit  Authority (one or more persons, books, scientific articles or sources of information)  Quantitative or qualitative analysis,  Deduction (premises that have been established from authority, observation, intuition or all three) | No | Recognition of children as being disproportionately impacted appears to be based on opinion.  The source for the reference to past heat waves is not explicit |  |
| Goals | Goals for child health explicitly stated | No |  |  |
| Goals are concrete enough (quantitative where possible and qualitative where not) to be evaluated later | No |  |  |
| Goal is clear in its intent and in the mechanism with which to achieve the desired goals, yet does not attempt to prescribe in detail what the change must be | No |  |  |
| Action/s outlined to improve child health | Yes | Existing actions include:  Heat protection plan of Styria, which includes information dissemination during heat waves to schools and kindergartens; initiatives and websites for children and young people providing information on natural hazards  Recommended actions include:  Developing communication strategies to provide disaster risk management information for children; developing shading solutions and drinking water fountains in children’s playgrounds and schools | “Providing timely information to important institutions (…schools and kindergartens…”  “For children and young people, initiatives, such as “Biber Berti” (hazard zone planning for children) or [www.generationblue.at](http://www.generationblue.at), provide information on the topic of natural hazards.”  “Development of communication strategies for specific target groups with particular needs (…children…)”  “Developing of shading solutions for… children’s playgrounds etc.”  “Strengthened provision of drinking water fountains in public buildings (schools etc.)” |
| Mechanisms by which children and/or pregnant women will be specifically targeted by the action are explicitly stated | Yes | Actions are targeted at schools and kindergartens |  |
| Minimum of two actions | Yes |  |  |
| Actions comprehensively address climate-sensitive health risks identified in policy background | Yes |  |  |
| Resources | Financial resources addressed  Estimated financial resources for implementation of the action/s given  Allocated financial resources for implementation of the action/s clear  Rewards/sanctions for spending allocated resources on other programs | No |  |  |
| Human resources addressed | No |  |  |
| Organisational capacity addressed | No |  |  |
| Policy indicated strategies to mobilise required resources | No |  |  |
| Monitoring and Evaluation | Policy indicated monitoring and evaluation mechanisms to track progress on goals for child health | No |  |  |
| Policy nominated a committee or independent body to do evaluation | No |  |  |
| Outcome measures identified for each of the explicit and implicit objectives | No |  |  |
| Data for evaluation will be collected before, during, and after introduction of the new policy | No |  |  |
| Follow-up takes place after a sufficient period to allow the effects of policy change to become evident | No |  |  |
| Other factors that could have produced the change (other than policy) identified | No |  |  |
| Criteria for evaluation adequate or clear | No |  |  |
| Implementation | Multiple stakeholders involved in the design and implementation of the action/s | No | Stakeholders for actions above are not stated |  |
| Obligations of the various implementers specified – who has to do what? | No |  |  |

Summary

| **Criteria** | **Quality** |
| --- | --- |
| Policy Background | Needs improvement |
| Goals | Needs improvement |
| Resources | Weak |
| Monitoring and Evaluation | Weak |
| Implementation | Weak |

### **Azerbaijan** – Updated document on Nationally Determined Contributions

|  | **Criteria** | **Criterion addressed?** | **Explanation** | **Quote** |
| --- | --- | --- | --- | --- |
| Policy Background | Children recognised as disproportionately affected by the impacts of climate change | Yes | Children are described as a vulnerable group |  |
| Minimum of two context-specific climate-sensitive health risks for children identified | No | Climate risk areas: extreme weather events | “In recent decades, precisely because of climate change, the impact of severe weather conditions on the population of Azerbaijan reveals the following vulnerable groups requiring urgent adaptation measures: children and adolescents…” |
| Source of background is explicit  Authority (one or more persons, books, scientific articles or sources of information)  Quantitative or qualitative analysis,  Deduction (premises that have been established from authority, observation, intuition or all three) | No |  |  |
| Goals | Goals for child health explicitly stated | No |  |  |
| Goals are concrete enough (quantitative where possible and qualitative where not) to be evaluated later | No |  |  |
| Goal is clear in its intent and in the mechanism with which to achieve the desired goals, yet does not attempt to prescribe in detail what the change must be | No |  |  |
| Action/s outlined to improve child health | No |  |  |
| Mechanisms by which children and/or pregnant women will be specifically targeted by the action are explicitly stated | No |  |  |
| Minimum of two actions | No |  |  |
| Actions comprehensively address climate-sensitive health risks identified in policy background | No |  |  |
| Resources | Financial resources addressed  Estimated financial resources for implementation of the action/s given  Allocated financial resources for implementation of the action/s clear  Rewards/sanctions for spending allocated resources on other programs | No |  |  |
| Human resources addressed | No |  |  |
| Organisational capacity addressed | No |  |  |
| Policy indicated strategies to mobilise required resources | No |  |  |
| Monitoring and Evaluation | Policy indicated monitoring and evaluation mechanisms to track progress on goals for child health | No |  |  |
| Policy nominated a committee or independent body to do evaluation | No |  |  |
| Outcome measures identified for each of the explicit and implicit objectives | No |  |  |
| Data for evaluation will be collected before, during, and after introduction of the new policy | No |  |  |
| Follow-up takes place after a sufficient period to allow the effects of policy change to become evident | No |  |  |
| Other factors that could have produced the change (other than policy) identified | No |  |  |
| Criteria for evaluation adequate or clear | No |  |  |
| Implementation | Multiple stakeholders involved in the design and implementation of the action/s | No |  |  |
| Obligations of the various implementers specified – who has to do what? | No |  |  |

Summary

| **Criteria** | **Quality** |
| --- | --- |
| Policy Background | Needs improvement |
| Goals | Weak |
| Resources | Weak |
| Monitoring and Evaluation | Weak |
| Implementation | Weak |

### **Belarus** – Nationally Determined Contribution of the Republic of Belarus to the reduction of greenhouse gas emissions until 2030

|  | **Criteria** | **Criterion addressed?** | **Explanation** | **Quote** |
| --- | --- | --- | --- | --- |
| Policy Background | Children recognised as disproportionately affected by the impacts of climate change | No | No mention of children |  |
| Minimum of two context-specific climate-sensitive health risks for children identified | No |  |  |
| Source of background is explicit  Authority (one or more persons, books, scientific articles or sources of information)  Quantitative or qualitative analysis,  Deduction (premises that have been established from authority, observation, intuition or all three) | No |  |  |
| Goals | Goals for child health explicitly stated | No |  |  |
| Goals are concrete enough (quantitative where possible and qualitative where not) to be evaluated later | No |  |  |
| Goal is clear in its intent and in the mechanism with which to achieve the desired goals, yet does not attempt to prescribe in detail what the change must be | No |  |  |
| Action/s outlined to improve child health | No |  |  |
| Mechanisms by which children and/or pregnant women will be specifically targeted by the action are explicitly stated | No |  |  |
| Minimum of two actions | No |  |  |
| Actions comprehensively address climate-sensitive health risks identified in policy background | No |  |  |
| Resources | Financial resources addressed  Estimated financial resources for implementation of the action/s given  Allocated financial resources for implementation of the action/s clear  Rewards/sanctions for spending allocated resources on other programs | No |  |  |
| Human resources addressed | No |  |  |
| Organisational capacity addressed | No |  |  |
| Policy indicated strategies to mobilise required resources | No |  |  |
| Monitoring and Evaluation | Policy indicated monitoring and evaluation mechanisms to track progress on goals for child health | No |  |  |
| Policy nominated a committee or independent body to do evaluation | No |  |  |
| Outcome measures identified for each of the explicit and implicit objectives | No |  |  |
| Data for evaluation will be collected before, during, and after introduction of the new policy | No |  |  |
| Follow-up takes place after a sufficient period to allow the effects of policy change to become evident | No |  |  |
| Other factors that could have produced the change (other than policy) identified | No |  |  |
| Criteria for evaluation adequate or clear | No |  |  |
| Implementation | Multiple stakeholders involved in the design and implementation of the action/s | No |  |  |
| Obligations of the various implementers specified – who has to do what? | No |  |  |

Summary

| **Criteria** | **Quality** |
| --- | --- |
| Policy Background | Weak |
| Goals | Weak |
| Resources | Weak |
| Monitoring and Evaluation | Weak |
| Implementation | Weak |

###

### **Belgium** – Vers une société résiliente au changement climatique á l’horizon 2050

|  | **Criteria** | **Criterion addressed?** | **Explanation** | **Quote** |
| --- | --- | --- | --- | --- |
| Policy Background | Children recognised as disproportionately affected by the impacts of climate change | No |  |  |
| Minimum of two context-specific climate-sensitive health risks for children identified | No |  |  |
| Source of background is explicit  Authority (one or more persons, books, scientific articles or sources of information)  Quantitative or qualitative analysis,  Deduction (premises that have been established from authority, observation, intuition or all three) | No |  |  |
| Goals | Goals for child health explicitly stated | No |  |  |
| Goals are concrete enough (quantitative where possible and qualitative where not) to be evaluated later | No |  |  |
| Goal is clear in its intent and in the mechanism with which to achieve the desired goals, yet does not attempt to prescribe in detail what the change must be | No |  |  |
| Action/s outlined to improve child health | No |  |  |
| Mechanisms by which children and/or pregnant women will be specifically targeted by the action are explicitly stated | No |  |  |
| Minimum of two actions | No |  |  |
| Actions comprehensively address climate-sensitive health risks identified in policy background | No |  |  |
| Resources | Financial resources addressed  Estimated financial resources for implementation of the action/s given  Allocated financial resources for implementation of the action/s clear  Rewards/sanctions for spending allocated resources on other programs | No |  |  |
| Human resources addressed | No |  |  |
| Organisational capacity addressed | No |  |  |
| Policy indicated strategies to mobilise required resources | No |  |  |
| Monitoring and Evaluation | Policy indicated monitoring and evaluation mechanisms to track progress on goals for child health | No |  |  |
| Policy nominated a committee or independent body to do evaluation | No |  |  |
| Outcome measures identified for each of the explicit and implicit objectives | No |  |  |
| Data for evaluation will be collected before, during, and after introduction of the new policy | No |  |  |
| Follow-up takes place after a sufficient period to allow the effects of policy change to become evident | No |  |  |
| Other factors that could have produced the change (other than policy) identified | No |  |  |
| Criteria for evaluation adequate or clear | No |  |  |
| Implementation | Multiple stakeholders involved in the design and implementation of the action/s | No |  |  |
| Obligations of the various implementers specified – who has to do what? | No |  |  |

Summary

| **Criteria** | **Quality** |
| --- | --- |
| Policy Background | Weak |
| Goals | Weak |
| Resources | Weak |
| Monitoring and Evaluation | Weak |
| Implementation | Weak |

### **Bosnia** **and** **Herzegovina** – Bosnia and Herzegovina National Adaptation Plan

|  | **Criteria** | **Criterion addressed?** | **Explanation** | **Quote** |
| --- | --- | --- | --- | --- |
| Policy Background | Children recognised as disproportionately affected by the impacts of climate change | Yes | Children are referred to as a vulnerable group | “Extreme climatic conditions may lead to more frequent changes and worsening of the health situation, especially in… vulnerable groups (children, pregnant women…)” |
[truncated: 307,966 more chars]
